# Supplementary material
Source: PubMed Central journal article supplement (PMC7944481)
Supplement: ac9b04933_si_001.pdf [file ac9b04933_si_001.pdf]

## Supporting Information

Implementing In-Cell Fast Photochemical Oxidation of Proteins in a Platform Incubator with Movable XY Stage

Danté T. Johnson,<sup>†</sup> Benjamin Punshon-Smith,<sup>‡</sup> Jessica A. Espino,<sup>†</sup> Anne Gershenson,<sup>§</sup> Lisa M. Jones\*,<sup>†</sup>

<sup>†</sup>Department of Pharmaceutical Sciences, University of Maryland, Baltimore, Maryland 21201, United States

<sup>‡</sup>Technology Research Center, University of Maryland Baltimore County, Catonsville, Maryland 21250, United States

<sup>§</sup>Department of Biology and Molecular Biology, University of Massachusetts, Amherst, Massachusetts 01003, United States

\*Correspondence to:

Lisa M. Jones

Department of Pharmaceutical Sciences

University of Maryland, Baltimore, MD 21201

Phone number: (410) 706-3380

Email: [ljones@rx.umaryland.edu](mailto:ljones@rx.umaryland.edu)

### Table of Contents

|                                                                                                    |      |
|----------------------------------------------------------------------------------------------------|------|
| Supplementary Methods .....                                                                        | S2   |
| Supplemental Figures .....                                                                         | S6   |
| Figure S1. ....                                                                                    | S6   |
| Figure S2. ....                                                                                    | S7   |
| Figure S3. ....                                                                                    | S8   |
| Supplementary Tables.....                                                                          | S9   |
| Table S1. Average number of modifications per system.....                                          | S9   |
| Table S2. Solvent accessible surface area (SASA) of modified residues in actin.....                | S10  |
| Table S3. IC-FPOP oxidatively modified proteins in 100 mM H <sub>2</sub> O <sub>2</sub> Flow.....  | S11  |
| Table S4. IC-FPOP oxidatively modified proteins in 100 mM H <sub>2</sub> O <sub>2</sub> PIXY ..... | S27  |
| Table S5. IC-FPOP oxidatively modified proteins in 200 mM H <sub>2</sub> O <sub>2</sub> PIXY.....  | S51  |
| Table S6. IV-FPOP oxidatively modified proteins in 200 mM H <sub>2</sub> O <sub>2</sub> PIXY.....  | S85  |
| Table S7. Average number of modifications per system (Full list of raw data).....                  | S112 |

## Supplemental Methods

**Materials.** Hydrogen peroxide, formic acid, dimethyl sulfoxide (DMSO), dimethylthiourea (DMTU), N-tert-butyl-phenylnitron (PBN), iodoacetamide (IAA), Lipofectamine 3000 transfection kit, Opti-MEM I (1X), Dulbecco's modified Eagle's medium (DMEM), Dulbecco's phosphate-buffered saline (DPBS), LC-MS grade solvents, acetone, fetal bovine serum (FBS), nuclease, trypsin, and GeneJet Plasmid Maxiprep kit were purchased from Thermo Fisher Scientific (Waltham, MA). Penicillin-streptomycin and 10X trypsin-EDTA were purchased from Corning (Corning, NY). Dithiothreitol (DTT) was purchased from American Bio (Canton, MA). Flow cell fittings were obtained from IDEX Health and Science (Oak Harbor, WA). Polyimide-coated fused silica was obtained from Polymicro Technologies (Phoenix, AZ). HEK293T cells were a gift from the Paul Shapiro Lab (University of Maryland Baltimore).

**Equipment and software.** Sterile incubator, carbon dioxide unit (CO2-UNIT-BL), temperature unit (H301-T Unit-BL-PLUS), air pump, humidifier, PTFE filter, and pressure gauge were purchased from OKOlabs (Ambridge, PA). Nano-LPMW stage, MadMotor Positioning system and controllers were purchased from Mad City Labs (Madison, WI). Ismatec Reglo ICC Peristaltic Pumps, tubing (Tygon 3.18 and 1.59 ID), and connectors (Y PP 1/16" and 1/16x1/8") were purchased from Cole-Palmer (Barrington, IL). Mirrors (50 mm) and mounts were purchased from Edmond Optics (Barrington, NJ) and Thor Labs (Newton, NJ) respectively. Six 33 mm PLA filament rings were designed with TiNKERcad and 3D printed using Afinia H480 3D Printer (Innovation Space University of Maryland Baltimore Campus Library). Preliminary automation was developed using LABVIEW Professional 2018 purchased from National Instruments (Austin, TX).

**In-Cell FPOP Flow System.** IC-FPOP was completed as previously described.<sup>21</sup> Briefly, HEK cells were grown to 80% confluence in a T-175 flask in DMEM supplemented with FBS and streptomycin-penicillin. The cells were trypsinized, centrifuged, and

resuspended in 6 mL of sterile DPBS. Each sample was prepared with 450  $\mu$ L of cells and 50  $\mu$ L of PBS. For IC-FPOP with the flow system, the cells were mixed in the syringe using a VP710 tumble stirrer (V&P Scientific, San Diego, CA) with six VP724F stir discs to prevent cell settling. Hydrogen peroxide, 100 mM, was mixed with the cells at the mixing tee. Samples were passed through a flow cell system at a total flow rate of 492.4  $\mu$ L/ min. The excimer laser was set to a pulse frequency of 44 Hz, with a laser energy of ~160 mJ and a pulse width of 2.58 ns. Cells were collected in a tube containing 11 mL of a quench solution composed of 125 mM DMTU and 125 mM PBN. DMSO (1%) was added to the quench solution to inhibit methionine sulfoxide reductase. Cells were labeled in biological duplicate, each in technical triplicate with an equal number of controls (no laser irradiation).

**Cell Lysis and Proteolysis.** Post FPOP, cells were centrifuged and resuspended in 100  $\mu$ L of radioimmunoprecipitation assay (RIPA) buffer, frozen in liquid nitrogen, and stored at  $-80$  °C overnight. Cells were thawed, incubated at 95 °C for 5 min, and cooled on ice for 5 min. The samples were treated with nuclease at room temperature for 15 min, centrifuged, and the supernatant was transferred to a new tube. The cell lysate was reduced with 500 mM DTT, alkylated with 500 mM IAA, and precipitated overnight with acetone. The precipitate was resuspended in 10 mM Tris and digested with trypsin overnight at 37 °C. Formic acid (FA) was added to a final concentration of 5% to quench digestion.

**Liquid Chromatography–Tandem Mass Spectrometry (LC–MS/MS).** Digested samples (50  $\mu$ g) were loaded onto an M-Class C18 trap column (Waters) and washed for 10 min with 0.1% formic acid at 15  $\mu$ L/min with an M-Class Acquity liquid chromatograph. Peptides were eluted and separated on a silica capillary column that was packed in-house with C18 reverse phase material (Aqua, 0.075  $\times$  20 mm, 5  $\mu$ m, 125 A, Phenomenex). The gradient was pumped at 300 nL/min for 120 min as follows: 0–1 min, 3% solvent B (acetonitrile, 0.1% formic acid); 2–90 min, 10–45% B; 100–105 min, 100% B; 106–120 min, 3% B. Eluted peptides were analyzed

under positive ion mode nanoflow electrospray using an Orbitrap Lumos Fusion mass spectrometer (Thermo Scientific). The mass spectrometer was operated in data-dependent acquisition mode. MS1 spectra were acquired over an m/z range of 375–1500 with 60000 resolution, with a dynamic exclusion of 60 s. The AGC target was set at 5.5e5 with a maximum injection time of 50 ms and 5.0e4 intensity threshold. Ions with charge states of 2-6 were ejected. MS2 ions were subjected to high-energy collisional dissociation (HCD) (32% normalized collision energy) and detected in the orbitrap with 15000 resolution and a 5.0e4 AGC target.

**Data Analysis.** All data files were searched as using Proteome Discoverer version 2.2 (Thermo Fisher Scientific, Waltham, MA) with Sequest HT against the Swiss-Prot reviewed human FASTA database that contains 20,193 proteins. Extracted ion chromatogram (EIC) areas for each peptide spectrum match (PSM) were calculated using a custom multilevel workflow. Briefly, five search algorithm levels were constructed in Proteome Discoverer and the commonly observed FPOP modifications were dispersed across the individual search levels. The fragment ion tolerance was set at 0.02 Da and the parent ion tolerance at 10 ppm, with the enzyme specificity set to trypsin with one missed cleavage. Peptides were ungrouped and filtered with the false discovery rate (FDR) set to a 5%. The data were exported to Excel and summarized using the PowerPivot add-in. Proteins were accepted if at least two distinct peptides were identified with the 5% FDR filter. The fractional oxidation per peptide or residue was determined according to the following equation:  $(\sum \text{EIC area modified}) / (\sum \text{EIC area})$  (1)

where, for peptide-level analysis, EIC area modified is the EIC area of a PSM containing an FPOP modification, and EIC area is the EIC area of any PSM with a sequence identical to that containing the modification. For residue-level analysis, EIC area modified is the EIC area of a PSM for a specific modified residue and EIC area is the EIC area of a PSM with sequences identical to those containing the modification.

**GCaMP2 Fluorescence Transfection and Imaging.** HEK cells were grown without antibiotic and harvested as described above in a six-well plate. Escherichia coli (strain DH10B) were transformed with pET28-GFP plasmid, grown in 250 ml LB broth overnight, and the plasmid was purified with a GeneJET Plasmid Maxiprep kit (Thermo Scientific., Vilnius, Lithuania). Cells were transfected using the Lipofectamine 3000 protocol. Briefly, 3.75  $\mu$ l of Lipofectamine reagent was diluted in 125  $\mu$ l of Opti-MEM medium. DNA master mix included 5  $\mu$ g of DNA, 60  $\mu$ l of P3000, and 1.5 ml of Opti-MEM. Diluted DNA and diluted Lipofectamine reagent were mixed at a 1:1 ratio and incubated at room temperature for 20 minutes. 250  $\mu$ l of the mix was then added to each well of HEK cells in the 6-well plate. Cell media was changed after 8 hours and imaging was done after 48 hours of incubation. Imaging was completed on a Leica SP8 confocal laser scanning microscope (Leica Microsystems Inc., Buffalo Groves, IL) with a Nikon Fluor 40x/0.80 W DLL objective (Nikon Instruments Inc., Melville, NY) with an exposure time of 500 ms.

**Luciferase assay.** Transfection efficiency was validated with a different vector plasmid, pRL-TK with the same transfection protocol above using Firefly luciferase.

**Cell Viability Assay.** HEK cells in DMEM media supplemented with 10% FBS were cultured in a T-175 flask to 70% confluence in the presence of streptomycin and penicillin. Cells were trypsinized, centrifuged, and resuspended in sterile PBS. Cells, 20  $\mu$ L, were aliquoted. A 200 mM stock of hydrogen peroxide was used to prepare 20, 40, 80, 100, 200 mM concentrations. Cells were incubated with 20  $\mu$ L hydrogen peroxide for 10 min, then mixed with 20  $\mu$ L of Trypan Blue stain 0.4%. The mixture was placed on a glass slide and cell viability was tested on Countess II (Thermo Fisher Scientific, Waltham, MA). Triplicate samples were measured for each H<sub>2</sub>O<sub>2</sub> concentration.

## Supplemental Figures

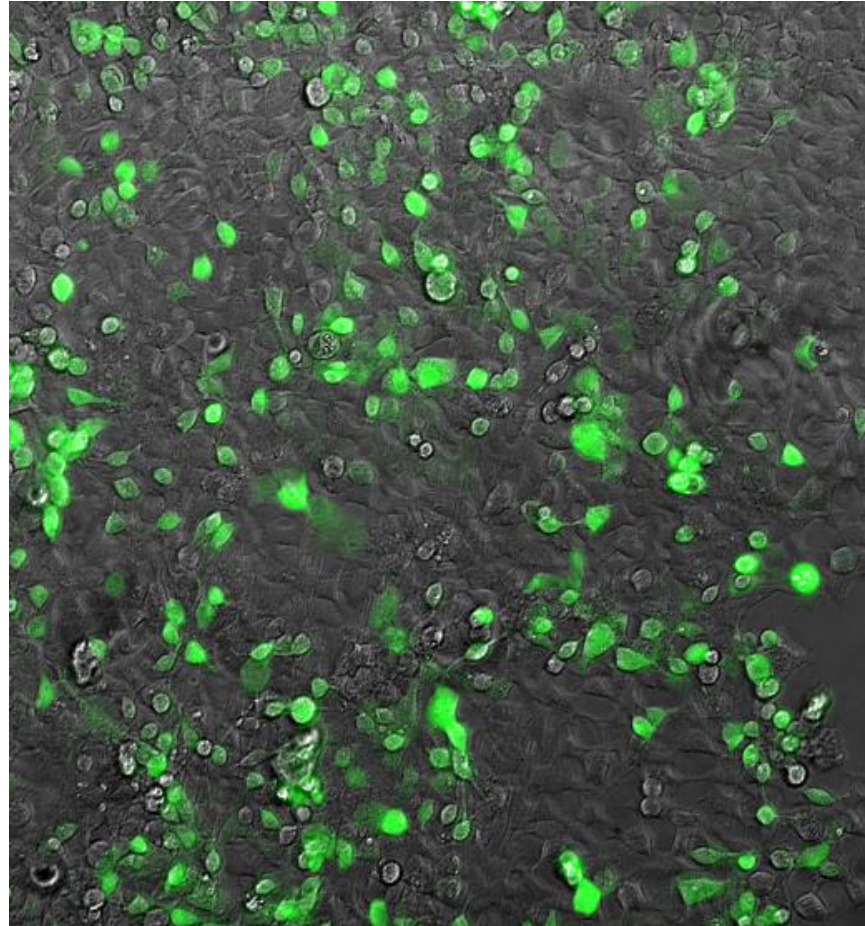

**Supplemental Figure S1.** HEK cell transfection efficiency. Fluorescent image of HEK cells transfected with GCaMP2 and grown in the stage top incubator, PIXY.

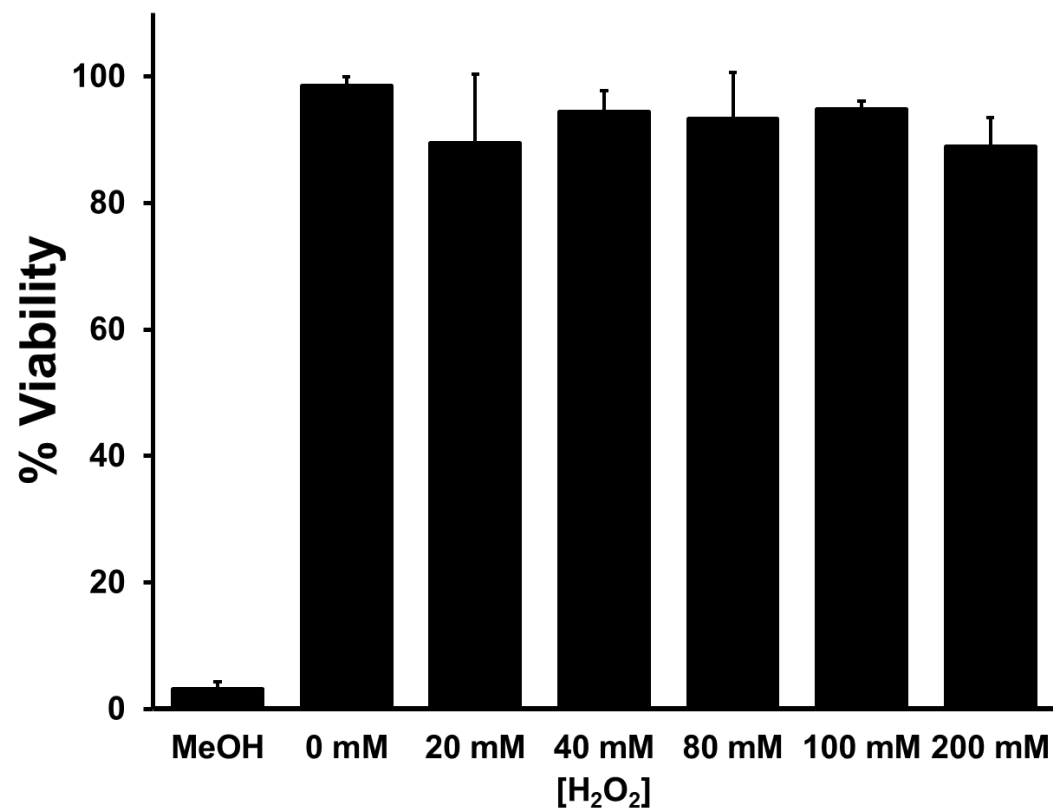

**Supplemental Figure S2.** HEK cell viability assay with increased concentrations of hydrogen peroxide. Methanol was used as a negative control, cell viability ~3%. Error bars equal the standard deviation of three replicates.

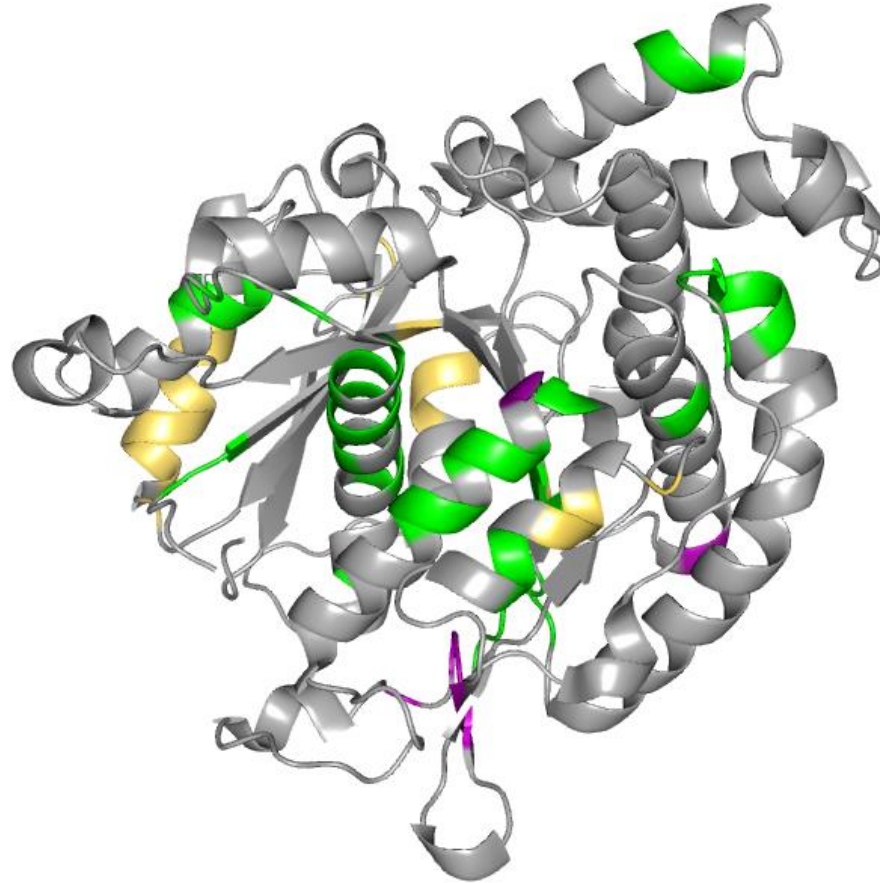

**Supplemental Figure S3.** Number of residues modified in the single cell flow system vs. PIXY. Modified residues of Tubulin beta chain (PDB:5N5N), 67 modified residues in PIXY (green), modified residues in flow (purple), overlapping modified residue (yellow).



## Supplemental Tables

| Condition and System                                         | Average | SD     |
|--------------------------------------------------------------|---------|--------|
| 100 mM H <sub>2</sub> O <sub>2</sub> FLOW                    | 10.98   | ±13.56 |
| 100 mM H <sub>2</sub> O <sub>2</sub> PIXY                    | 11.08   | ±13.27 |
| 200 mM H <sub>2</sub> O <sub>2</sub> PIXY                    | 41.29   | ±59.30 |
| 200 mM H <sub>2</sub> O <sub>2</sub> FLOW ( <i>in vivo</i> ) | 13.11   | ±16.13 |
| 200 mM H <sub>2</sub> O <sub>2</sub> PIXY ( <i>in vivo</i> ) | 14.49   | ±23.21 |

**Table S1.** Average number of residues modified per condition in each system.

| <b>G-actin</b>            | <b>6ZXJ</b>      | <b>6ZXJ</b>      | <b>6ZXJ</b>      | <b>6ZXJ</b>      | <b>6ZXJ</b>      |
|---------------------------|------------------|------------------|------------------|------------------|------------------|
| <b>Modified Residues</b>  | <b>Chain A %</b> | <b>Chain B %</b> | <b>Chain C %</b> | <b>Chain D %</b> | <b>Chain E %</b> |
| <b>M44<sup>a</sup></b>    | 3.7              | 6.0              | 4.6              | 78.9             | 74.9             |
| <b>V45<sup>a</sup></b>    | 3.6              | 5.8              | 4.3              | 100              | 100              |
| <b>D51<sup>a</sup></b>    | 71               | 73.6             | 74.3             | 75               | 76.1             |
| <b>F127<sup>b</sup></b>   | 3.9              | 3.7              | 5.7              | 6.9              | 7.5              |
| <b>Y133<sup>b</sup></b>   | 9.2              | 9.1              | 1.6              | 7.5              | 6                |
| <b>V152<sup>b</sup></b>   | 3.2              | 4                | 0.7              | 0.7              | 0.7              |
| <b>M153<sup>b</sup></b>   | 2.1              | 1.7              | 1.8              | 1.7              | 1.4              |
| <b>D154<sup>b</sup></b>   | 2.2              | 1.8              | 1.6              | 0.4              | 0.1              |
| <b>H161<sup>b</sup></b>   | 1                | 0.2              | 2.7              | 0.9              | 2.3              |
| <b>M190<sup>b</sup></b>   | 26.3             | 26.5             | 26.7             | 26.3             | 24.9             |
| <b>L299<sup>b</sup></b>   | 3.2              | 0.4              | 1.3              | 0.8              | 0.8              |
| <b>M305<sup>b</sup></b>   | 35               | 35.8             | 35.9             | 34.6             | 43.8             |
| <b>K326<sup>b</sup></b>   | 100              | 100              | 100              | 100              | 93.6             |
| <b>P322<sup>a,b</sup></b> | 49.1             | 42.1             | 25.6             | 26.5             | 26               |

<sup>a</sup>=Residue modified with the flow system

<sup>b</sup>=Residue modified with PIXY

**Table S2.** Solvent Accessible surface area (SASA) of modified residues in actin. The solvent accessibility of each modified residue using the GETAREA 1.0 beta online software. Residues are solvent exposed if the ratio value exceeds 50% and to be buried if the ratio is less than 20%.

**Table S3.** IC-FPOP oxidatively modified proteins in 100 mM H<sub>2</sub>O<sub>2</sub> Flow

| Uniprot ID | Protein Name                                | Biological Replicate        | Number of Modified Peptides |
|------------|---------------------------------------------|-----------------------------|-----------------------------|
| P61604     | 10 kDa heat shock protein, mitochondrial    | Biological Replicate 2 Only | 2                           |
| Q9NRX4     | 14 kDa phosphohistidine phosphatase         | Biological Replicate 1 Only | 1                           |
| P31946     | 14-3-3 protein beta/alpha                   | Biological Replicate 2 Only | 1                           |
| Q04917     | 14-3-3 protein eta                          | Biological Replicate 2 Only | 1                           |
| P61981     | 14-3-3 protein gamma                        | Biological Replicate 2 Only | 1                           |
| P27348     | 14-3-3 protein theta                        | Biological Replicate 2 Only | 1                           |
| P27348     | 14-3-3 protein theta                        | Biological 1 and 2          | 2                           |
| P63104     | 14-3-3 protein zeta/delta                   | Biological 1 and 2          | 2                           |
| Q6L8Q7     | 2',5'-phosphodiesterase 12                  | Biological Replicate 2 Only | 1                           |
| Q9Y3D3     | 28S ribosomal protein S16, mitochondrial    | Biological Replicate 1 Only | 1                           |
| P52815     | 39S ribosomal protein L12, mitochondrial    | Biological Replicate 2 Only | 1                           |
| P46782     | 40S ribosomal protein S5                    | Biological Replicate 2 Only | 1                           |
| P10809     | 60 kDa heat shock protein, mitochondrial    | Biological Replicate 2 Only | 5                           |
| P05387     | 60S acidic ribosomal protein P2             | Biological Replicate 2 Only | 1                           |
| P62917     | 60S ribosomal protein L8                    | Biological Replicate 1 Only | 1                           |
| P24752     | Acetyl-CoA acetyltransferase, mitochondrial | Biological Replicate 2 Only | 1                           |
| Q13085     | Acetyl-CoA carboxylase 1                    | Biological Replicate 2 Only | 1                           |
| P68032     | Actin, alpha cardiac muscle 1               | Biological 1 and 2          | 8                           |
| P68133     | Actin, alpha skeletal muscle                | Biological 1 and 2          | 7                           |
| P68133     | Actin, alpha skeletal muscle                | Biological Replicate 1 Only | 1                           |
| P62736     | Actin, aortic smooth muscle                 | Biological 1 and 2          | 7                           |
| P60709     | Actin, cytoplasmic 1                        | Biological 1 and 2          | 6                           |
| P60709     | Actin, cytoplasmic 1                        | Biological Replicate 1 Only | 3                           |
| P63261     | Actin, cytoplasmic 2                        | Biological 1 and 2          | 9                           |
| P63267     | Actin, gamma-enteric smooth muscle          | Biological Replicate 1 Only | 1                           |
| P63267     | Actin, gamma-enteric smooth muscle          | Biological 1 and 2          | 6                           |
| O95622     | Adenylate cyclase type 5                    | Biological Replicate 1 Only | 1                           |
| Q96PE1     | Adhesion G protein-coupled receptor A2      | Biological Replicate 2 Only | 1                           |
| P12235     | ADP/ATP translocase 1                       | Biological Replicate 2 Only | 1                           |
| P05141     | ADP/ATP translocase 2                       | Biological Replicate 2 Only | 1                           |

| Uniprot ID | Protein Name                                  | Biological Replicate        | Number of Modified Peptides |
|------------|-----------------------------------------------|-----------------------------|-----------------------------|
| P12236     | ADP/ATP translocase 3                         | Biological Replicate 2 Only | 1                           |
| Q9H0C2     | ADP/ATP translocase 4                         | Biological Replicate 2 Only | 1                           |
| O00468     | Agrin                                         | Biological Replicate 2 Only | 1                           |
| Q13023     | A-kinase anchor protein 6                     | Biological Replicate 1 Only | 1                           |
| Q5JTZ9     | Alanine--tRNA ligase, mitochondrial           | Biological Replicate 1 Only | 1                           |
| Q9UM73     | ALK tyrosine kinase receptor                  | Biological Replicate 2 Only | 1                           |
| Q13424     | Alpha-1-syntrophin                            | Biological Replicate 2 Only | 1                           |
| O43768     | Alpha-endosulfine                             | Biological Replicate 2 Only | 1                           |
| P06733     | Alpha-enolase                                 | Biological 1 and 2          | 2                           |
| Q9UJX5     | Anaphase-promoting complex subunit 4          | Biological Replicate 2 Only | 1                           |
| Q9UJX4     | Anaphase-promoting complex subunit 5          | Biological Replicate 1 Only | 1                           |
| Q5TYW2     | Ankyrin repeat domain-containing protein 20A1 | Biological Replicate 2 Only | 1                           |
| Q5SQ80     | Ankyrin repeat domain-containing protein 20A2 | Biological Replicate 2 Only | 1                           |
| Q5VUR7     | Ankyrin repeat domain-containing protein 20A3 | Biological Replicate 2 Only | 1                           |
| Q4UJ75     | Ankyrin repeat domain-containing protein 20A4 | Biological Replicate 2 Only | 1                           |
| Q5CZ79     | Ankyrin repeat domain-containing protein 20B  | Biological Replicate 2 Only | 1                           |
| Q8TF21     | Ankyrin repeat domain-containing protein 24   | Biological Replicate 1 Only | 1                           |
| A6QL64     | Ankyrin repeat domain-containing protein 36A  | Biological Replicate 1 Only | 1                           |
| Q8N2N9     | Ankyrin repeat domain-containing protein 36B  | Biological Replicate 1 Only | 1                           |
| Q5JPF3     | Ankyrin repeat domain-containing protein 36C  | Biological Replicate 1 Only | 1                           |
| Q8TD06     | Anterior gradient protein 3                   | Biological Replicate 2 Only | 1                           |
| Q9UPP5     | AP2-interacting clathrin-endocytosis protein  | Biological Replicate 2 Only | 1                           |
| Q07812     | Apoptosis regulator BAX                       | Biological Replicate 2 Only | 1                           |
| P25705     | ATP synthase subunit alpha, mitochondrial     | Biological Replicate 1 Only | 1                           |
| P18859     | ATP synthase-coupling factor 6, mitochondrial | Biological Replicate 2 Only | 1                           |
| Q9NR09     | Baculoviral IAP repeat-containing protein 6   | Biological Replicate 2 Only | 1                           |
| Q6ZT62     | Bargin                                        | Biological Replicate 2 Only | 2                           |
| P35613     | Basigin                                       | Biological Replicate 1 Only | 1                           |
| Q96PG8     | Bcl-2-binding component 3, isoforms 3/4       | Biological Replicate 2 Only | 1                           |
| Q562R1     | Beta-actin-like protein 2                     | Biological Replicate 1 Only | 2                           |
| Q562R1     | Beta-actin-like protein 2                     | Biological Replicate 2 Only | 1                           |

| Uniprot ID | Protein Name                                      | Biological Replicate        | Number of Modified Peptides |
|------------|---------------------------------------------------|-----------------------------|-----------------------------|
| Q9Y5Z0     | Beta-secretase 2                                  | Biological Replicate 2 Only | 1                           |
| P80723     | Brain acid soluble protein 1                      | Biological Replicate 2 Only | 1                           |
| Q6PJG6     | BRCA1-associated ATM activator 1                  | Biological Replicate 1 Only | 1                           |
| Q9ULD4     | Bromodomain and PHD finger-containing protein 3   | Biological Replicate 1 Only | 1                           |
| Q9NSI6     | Bromodomain and WD repeat-containing protein 1    | Biological Replicate 2 Only | 1                           |
| Q8NCU7     | C2 calcium-dependent domain-containing protein 4A | Biological Replicate 1 Only | 1                           |
| A6NLJ0     | C2 calcium-dependent domain-containing protein 4B | Biological Replicate 1 Only | 1                           |
| Q9Y6N8     | Cadherin-10                                       | Biological Replicate 1 Only | 1                           |
| P55285     | Cadherin-6                                        | Biological Replicate 1 Only | 1                           |
| Q96JQ2     | Calmin                                            | Biological Replicate 1 Only | 1                           |
| P20810     | Calpastatin                                       | Biological Replicate 2 Only | 1                           |
| P27797     | Calreticulin                                      | Biological 1 and 2          | 2                           |
| Q6ZU35     | Cancer-related regulator of actin dynamics        | Biological Replicate 1 Only | 1                           |
| Q8WXD9     | Caskin-1                                          | Biological Replicate 2 Only | 1                           |
| Q9BX69     | Caspase recruitment domain-containing protein 6   | Biological Replicate 2 Only | 1                           |
| P35222     | Catenin beta-1                                    | Biological Replicate 2 Only | 1                           |
| O60716     | Catenin delta-1                                   | Biological Replicate 2 Only | 1                           |
| O43264     | Centromere/kinetochore protein zw10 homolog       | Biological Replicate 2 Only | 1                           |
| Q5SW79     | Centrosomal protein of 170 kDa                    | Biological Replicate 2 Only | 1                           |
| Q96L14     | Cep170-like protein                               | Biological Replicate 2 Only | 1                           |
| Q8TD26     | Chromodomain-helicase-DNA-binding protein 6       | Biological Replicate 2 Only | 1                           |
| Q9P2D1     | Chromodomain-helicase-DNA-binding protein 7       | Biological Replicate 2 Only | 1                           |
| Q3L8U1     | Chromodomain-helicase-DNA-binding protein 9       | Biological Replicate 2 Only | 1                           |
| P28331     | CI-75kD                                           | Biological Replicate 1 Only | 1                           |
| Q8TBY9     | Cilia- and flagella-associated protein 251        | Biological Replicate 1 Only | 1                           |
| Q96MR6     | Cilia- and flagella-associated protein 57         | Biological Replicate 2 Only | 1                           |
| Q7Z4T9     | Cilia- and flagella-associated protein 91         | Biological Replicate 2 Only | 1                           |
| P09496     | Clathrin light chain A                            | Biological Replicate 2 Only | 2                           |
| P53618     | Coatomer subunit beta                             | Biological Replicate 1 Only | 1                           |
| Q8TD31     | Coiled-coil alpha-helical rod protein 1           | Biological Replicate 1 Only | 1                           |
| Q96A33     | Coiled-coil domain-containing protein 47          | Biological Replicate 2 Only | 1                           |

| Uniprot ID | Protein Name                                   | Biological Replicate        | Number of Modified Peptides |
|------------|------------------------------------------------|-----------------------------|-----------------------------|
| Q17RW2     | Collagen alpha-1                               | Biological Replicate 1 Only | 1                           |
| Q9BXR6     | Complement factor H-related protein 5          | Biological Replicate 1 Only | 1                           |
| O75489     | Complex I-42kD                                 | Biological Replicate 2 Only | 1                           |
| Q96FN4     | Copine-2                                       | Biological Replicate 2 Only | 1                           |
| O75131     | Copine-3                                       | Biological Replicate 2 Only | 1                           |
| Q96A23     | Copine-4                                       | Biological Replicate 2 Only | 1                           |
| Q9HCH3     | Copine-5                                       | Biological Replicate 2 Only | 1                           |
| O95741     | Copine-6                                       | Biological Replicate 2 Only | 1                           |
| Q9UBL6     | Copine-7                                       | Biological Replicate 2 Only | 1                           |
| Q86YQ8     | Copine-8                                       | Biological Replicate 2 Only | 1                           |
| Q8IYJ1     | Copine-9                                       | Biological Replicate 2 Only | 1                           |
| O75367     | Core histone macro-H2A.1                       | Biological Replicate 1 Only | 1                           |
| Q9P0M6     | Core histone macro-H2A.2                       | Biological Replicate 1 Only | 1                           |
| P12277     | Creatine kinase B-type                         | Biological Replicate 1 Only | 1                           |
| Q15078     | Cyclin-dependent kinase 5 activator 1          | Biological Replicate 2 Only | 1                           |
| P20674     | Cytochrome c oxidase subunit 5A, mitochondrial | Biological Replicate 2 Only | 1                           |
| P14854     | Cytochrome c oxidase subunit 6B1               | Biological Replicate 2 Only | 1                           |
| Q9H7D0     | Dedicator of cytokinesis protein 5             | Biological Replicate 1 Only | 1                           |
| Q8NF50     | Dedicator of cytokinesis protein 8             | Biological Replicate 2 Only | 1                           |
| Q08554     | Desmocollin-1                                  | Biological Replicate 2 Only | 1                           |
| Q14126     | Desmoglein-2                                   | Biological Replicate 2 Only | 1                           |
| Q13574     | Diacylglycerol kinase zeta                     | Biological Replicate 1 Only | 1                           |
| Q02127     | Dihydroorotate dehydrogenase                   | Biological Replicate 1 Only | 1                           |
| P49917     | DNA ligase 4                                   | Biological Replicate 1 Only | 1                           |
| P11387     | DNA topoisomerase 1                            | Biological Replicate 1 Only | 1                           |
| P48382     | DNA-binding protein RFX5                       | Biological Replicate 1 Only | 1                           |
| Q8TE73     | Dynein heavy chain 5, axonemal                 | Biological Replicate 1 Only | 1                           |
| Q8WXX0     | Dynein heavy chain 7, axonemal                 | Biological Replicate 1 Only | 1                           |
| Q96JB1     | Dynein heavy chain 8, axonemal                 | Biological Replicate 1 Only | 1                           |
| O95714     | E3 ubiquitin-protein ligase HERC2              | Biological Replicate 2 Only | 1                           |
| O75592     | E3 ubiquitin-protein ligase MYCBP2             | Biological Replicate 2 Only | 1                           |

| Uniprot ID | Protein Name                                            | Biological Replicate        | Number of Modified Peptides |
|------------|---------------------------------------------------------|-----------------------------|-----------------------------|
| Q5T4S7     | E3 ubiquitin-protein ligase UBR4                        | Biological Replicate 2 Only | 1                           |
| A4FU69     | EF-hand calcium-binding domain-containing protein 5     | Biological Replicate 1 Only | 1                           |
| P68104     | Elongation factor 1-alpha 1                             | Biological Replicate 1 Only | 1                           |
| P49411     | Elongation factor Tu, mitochondrial                     | Biological Replicate 1 Only | 1                           |
| P50402     | Emerin                                                  | Biological Replicate 2 Only | 1                           |
| Q9NRM1     | Enamelin                                                | Biological Replicate 1 Only | 1                           |
| Q9YNA8     | Endogenous retrovirus group K member 19 Gag polyprotein | Biological Replicate 1 Only | 1                           |
| P11021     | Endoplasmic reticulum chaperone BiP                     | Biological 1 and 2          | 3                           |
| P14625     | Endoplasmic reticulum chaperone BiP                     | Biological Replicate 1 Only | 2                           |
| Q92556     | Engulfment and cell motility protein 1                  | Biological Replicate 1 Only | 1                           |
| P54764     | Ephrin type-A receptor 4                                | Biological Replicate 1 Only | 1                           |
| P54756     | Ephrin type-A receptor 5                                | Biological Replicate 1 Only | 1                           |
| P60842     | Eukaryotic initiation factor 4A-I                       | Biological Replicate 1 Only | 1                           |
| P56537     | Eukaryotic translation initiation factor 6              | Biological Replicate 2 Only | 1                           |
| Q9NVH0     | Exonuclease 3'-5' domain-containing protein 2           | Biological Replicate 2 Only | 1                           |
| Q9Y2L1     | Exosome complex exonuclease RRP44                       | Biological Replicate 1 Only | 1                           |
| Q96AE4     | Far upstream element-binding protein 1                  | Biological Replicate 2 Only | 1                           |
| Q8NFZ0     | F-box DNA helicase 1                                    | Biological Replicate 1 Only | 1                           |
| Q2WVGJ9    | Fer-1-like protein 6                                    | Biological Replicate 2 Only | 1                           |
| P21333     | Filamin-A                                               | Biological Replicate 1 Only | 1                           |
| O60548     | Forkhead box protein D2                                 | Biological Replicate 1 Only | 1                           |
| Q96M96     | FYVE, RhoGEF and PH domain-containing protein 4         | Biological Replicate 2 Only | 1                           |
| P09104     | Gamma-enolase                                           | Biological Replicate 1 Only | 1                           |
| Q9NQR9     | Glucose-6-phosphatase 2                                 | Biological Replicate 1 Only | 1                           |
| P14314     | Glucosidase 2 subunit beta                              | Biological Replicate 2 Only | 2                           |
| P04406     | Glyceraldehyde-3-phosphate dehydrogenase                | Biological Replicate 1 Only | 2                           |
| Q07021     | Glycoprotein gC1qBP                                     | Biological Replicate 1 Only | 2                           |
| Q09328     | GNT-V                                                   | Biological Replicate 2 Only | 1                           |
| Q3T8J9     | GON-4-like protein                                      | Biological Replicate 1 Only | 1                           |
| Q9HCN4     | GPN-loop GTPase 1                                       | Biological Replicate 2 Only | 1                           |
| O60883     | G-protein coupled receptor 37-like 1                    | Biological Replicate 2 Only | 1                           |

| Uniprot ID | Protein Name                                   | Biological Replicate        | Number of Modified Peptides |
|------------|------------------------------------------------|-----------------------------|-----------------------------|
| Q8TBN0     | Guanine nucleotide exchange factor for Rab-3A  | Biological Replicate 1 Only | 1                           |
| Q9UBI6     | Guanine nucleotide-binding protein G           | Biological Replicate 2 Only | 1                           |
| P0DMV9     | Heat shock 70 kDa protein 1B                   | Biological 1 and 2          | 3                           |
| P0DMV9     | Heat shock 70 kDa protein 1B                   | Biological 1 and 2          | 6                           |
| P34931     | Heat shock 70 kDa protein 1-like               | Biological 1 and 2          | 2                           |
| P34932     | Heat shock 70 kDa protein 4                    | Biological 1 and 2          | 2                           |
| P17066     | Heat shock 70 kDa protein 6                    | Biological 1 and 2          | 2                           |
| P11142     | Heat shock cognate 71 kDa protein              | Biological Replicate 2 Only | 1                           |
| P11142     | Heat shock cognate 71 kDa protein              | Biological 1 and 2          | 3                           |
| P07900     | Heat shock protein HSP 90-alpha                | Biological 1 and 2          | 4                           |
| P08238     | Heat shock protein HSP 90-beta                 | Biological 1 and 2          | 2                           |
| P08238     | Heat shock protein HSP 90-beta                 | Biological 1 and 2          | 2                           |
| P54652     | Heat shock-related 70 kDa protein 2            | Biological Replicate 2 Only | 1                           |
| P54652     | Heat shock-related 70 kDa protein 2            | Biological Replicate 1 Only | 1                           |
| O60243     | Heparan-sulfate 6-O-sulfotransferase 1         | Biological Replicate 2 Only | 1                           |
| Q9UM44     | HERV-H LTR-associating protein 2               | Biological Replicate 1 Only | 1                           |
| P61978     | Heterogeneous nuclear ribonucleoprotein K      | Biological Replicate 2 Only | 1                           |
| P52272     | Heterogeneous nuclear ribonucleoprotein M      | Biological 1 and 2          | 2                           |
| O60506     | Heterogeneous nuclear ribonucleoprotein Q      | Biological Replicate 2 Only | 1                           |
| Q00839     | Heterogeneous nuclear ribonucleoprotein U      | Biological Replicate 2 Only | 1                           |
| P22626     | Heterogeneous nuclear ribonucleoproteins A2/B1 | Biological Replicate 1 Only | 1                           |
| P07910     | Heterogeneous nuclear ribonucleoproteins C1/C2 | Biological Replicate 2 Only | 1                           |
| P42357     | Histidine ammonia-lyase                        | Biological Replicate 2 Only | 1                           |
| Q02539     | Histone H1.1                                   | Biological Replicate 2 Only | 1                           |
| P16403     | Histone H1.2                                   | Biological Replicate 2 Only | 1                           |
| P16402     | Histone H1.3                                   | Biological Replicate 2 Only | 1                           |
| P10412     | Histone H1.4                                   | Biological Replicate 2 Only | 1                           |
| P22492     | Histone H1t                                    | Biological Replicate 2 Only | 1                           |
| P0C0S8     | Histone H2A type 1                             | Biological Replicate 1 Only | 1                           |
| P04908     | Histone H2A type 1-B/E                         | Biological Replicate 1 Only | 1                           |
| Q93077     | Histone H2A type 1-C                           | Biological Replicate 1 Only | 1                           |



| Uniprot ID | Protein Name                            | Biological Replicate        | Number of Modified Peptides |
|------------|-----------------------------------------|-----------------------------|-----------------------------|
| P20671     | Histone H2A type 1-D                    | Biological Replicate 1 Only | 1                           |
| Q96KK5     | Histone H2A type 1-H                    | Biological Replicate 1 Only | 1                           |
| Q99878     | Histone H2A type 1-J                    | Biological Replicate 1 Only | 1                           |
| Q6FI13     | Histone H2A type 2-A                    | Biological Replicate 1 Only | 2                           |
| Q16777     | Histone H2A type 2-C                    | Biological Replicate 1 Only | 2                           |
| Q7L7L0     | Histone H2A type 3                      | Biological Replicate 1 Only | 1                           |
| Q9BTM1     | Histone H2A.J                           | Biological Replicate 1 Only | 1                           |
| Q71UI9     | Histone H2A.V                           | Biological Replicate 1 Only | 1                           |
| P0C0S5     | Histone H2A.Z                           | Biological Replicate 1 Only | 1                           |
| P33778     | Histone H2B type 1-B                    | Biological 1 and 2          | 2                           |
| P62807     | Histone H2B type 1-C/E/F/G/I            | Biological 1 and 2          | 2                           |
| P58876     | Histone H2B type 1-D                    | Biological 1 and 2          | 2                           |
| Q93079     | Histone H2B type 1-H                    | Biological 1 and 2          | 2                           |
| P06899     | Histone H2B type 1-J                    | Biological 1 and 2          | 2                           |
| O60814     | Histone H2B type 1-K                    | Biological 1 and 2          | 2                           |
| Q99880     | Histone H2B type 1-L                    | Biological 1 and 2          | 2                           |
| Q99879     | Histone H2B type 1-M                    | Biological 1 and 2          | 2                           |
| Q99877     | Histone H2B type 1-N                    | Biological 1 and 2          | 2                           |
| P23527     | Histone H2B type 1-O                    | Biological 1 and 2          | 2                           |
| Q16778     | Histone H2B type 2-E                    | Biological 1 and 2          | 2                           |
| Q5QNW6     | Histone H2B type 2-F                    | Biological 1 and 2          | 2                           |
| Q8N257     | Histone H2B type 3-B                    | Biological 1 and 2          | 2                           |
| P57053     | Histone H2B type F-S                    | Biological 1 and 2          | 2                           |
| P68431     | Histone H3.1                            | Biological Replicate 1 Only | 1                           |
| Q16695     | Histone H3.1t                           | Biological Replicate 1 Only | 1                           |
| Q71DI3     | Histone H3.2                            | Biological Replicate 1 Only | 2                           |
| P62805     | Histone H4                              | Biological 1 and 2          | 4                           |
| Q99525     | Histone H4-like protein type G          | Biological Replicate 2 Only | 1                           |
| O96028     | Histone-lysine N-methyltransferase NSD2 | Biological Replicate 1 Only | 1                           |
| P0CG04     | Immunoglobulin lambda constant 1        | Biological Replicate 2 Only | 1                           |
| P0DOX8     | Immunoglobulin lambda-1 light chain     | Biological Replicate 2 Only | 1                           |

| Uniprot ID | Protein Name                                            | Biological Replicate        | Number of Modified Peptides |
|------------|---------------------------------------------------------|-----------------------------|-----------------------------|
| B9A064     | Immunoglobulin lambda-like polypeptide 5                | Biological Replicate 2 Only | 1                           |
| Q8TEX9     | Importin-4                                              | Biological Replicate 1 Only | 1                           |
| O14920     | Inhibitor of nuclear factor kappa-B kinase subunit beta | Biological Replicate 2 Only | 1                           |
| Q14571     | Inositol 1,4,5-trisphosphate receptor type 2            | Biological Replicate 2 Only | 1                           |
| O15327     | Inositol polyphosphate 4-phosphatase type II            | Biological Replicate 1 Only | 1                           |
| P14735     | Insulin-degrading enzyme                                | Biological Replicate 2 Only | 1                           |
| Q9Y6M1     | Insulin-like growth factor 2 mRNA-binding protein 2     | Biological Replicate 2 Only | 1                           |
| O00425     | Insulin-like growth factor 2 mRNA-binding protein 3     | Biological Replicate 2 Only | 1                           |
| Q9UL03     | Integrator complex subunit 6                            | Biological Replicate 1 Only | 1                           |
| P48551     | Interferon alpha/beta receptor 2                        | Biological Replicate 1 Only | 1                           |
| P53990     | IST1 homolog                                            | Biological Replicate 2 Only | 1                           |
| Q5VZ66     | Janus kinase and microtubule-interacting protein 3      | Biological Replicate 1 Only | 1                           |
| Q2WVGJ6    | Kelch-like protein 38                                   | Biological Replicate 1 Only | 1                           |
| P13645     | Keratin, type I cytoskeletal 10                         | Biological Replicate 1 Only | 3                           |
| P02533     | Keratin, type I cytoskeletal 14                         | Biological Replicate 2 Only | 1                           |
| P08779     | Keratin, type I cytoskeletal 16                         | Biological Replicate 1 Only | 1                           |
| Q04695     | Keratin, type I cytoskeletal 17                         | Biological Replicate 2 Only | 1                           |
| P35527     | Keratin, type I cytoskeletal 9                          | Biological 1 and 2          | 7                           |
| P78385     | Keratin, type II cuticular Hb3                          | Biological Replicate 2 Only | 1                           |
| P78386     | Keratin, type II cuticular Hb5                          | Biological Replicate 2 Only | 1                           |
| P04264     | Keratin, type II cytoskeletal 1                         | Biological Replicate 1 Only | 3                           |
| P35908     | Keratin, type II cytoskeletal 2 epidermal               | Biological Replicate 1 Only | 4                           |
| P12035     | Keratin, type II cytoskeletal 3                         | Biological Replicate 1 Only | 1                           |
| P13647     | Keratin, type II cytoskeletal 5                         | Biological 1 and 2          | 2                           |
| P02538     | Keratin, type II cytoskeletal 6A                        | Biological 1 and 2          | 3                           |
| P04259     | Keratin, type II cytoskeletal 6B                        | Biological 1 and 2          | 3                           |
| P48668     | Keratin, type II cytoskeletal 6C                        | Biological 1 and 2          | 3                           |
| P08729     | Keratin, type II cytoskeletal 7                         | Biological Replicate 2 Only | 1                           |
| O95678     | Keratin, type II cytoskeletal 75                        | Biological Replicate 2 Only | 1                           |
| Q5XKE5     | Keratin, type II cytoskeletal 79                        | Biological Replicate 2 Only | 1                           |
| P05787     | Keratin, type II cytoskeletal 8                         | Biological Replicate 2 Only | 1                           |

| Uniprot ID | Protein Name                                                | Biological Replicate        | Number of Modified Peptides |
|------------|-------------------------------------------------------------|-----------------------------|-----------------------------|
| Q6UWL6     | Kin of IRRE-like protein 2                                  | Biological Replicate 2 Only | 1                           |
| Q04760     | Lactoylglutathione lyase                                    | Biological Replicate 1 Only | 1                           |
| P42166     | Lamina-associated polypeptide 2, isoform alpha              | Biological Replicate 1 Only | 1                           |
| P42167     | Lamina-associated polypeptide 2, isoforms beta/gamma        | Biological Replicate 1 Only | 1                           |
| Q9UK59     | Lariat debranching enzyme                                   | Biological Replicate 2 Only | 1                           |
| A6NIV6     | Leucine-rich repeat and IQ domain-containing protein 4      | Biological Replicate 1 Only | 1                           |
| P00338     | L-lactate dehydrogenase A chain                             | Biological Replicate 2 Only | 1                           |
| P36776     | Lon protease homolog, mitochondrial                         | Biological Replicate 1 Only | 1                           |
| Q9NZQ8     | Long transient receptor potential channel 5                 | Biological Replicate 2 Only | 1                           |
| O95232     | Luc7-like protein 3                                         | Biological Replicate 1 Only | 1                           |
| Q6B016     | Lysine-specific demethylase 4D                              | Biological Replicate 1 Only | 1                           |
| O75151     | Lysine-specific demethylase PHF2                            | Biological Replicate 2 Only | 1                           |
| Q8NDA8     | Maestro heat-like repeat-containing protein family member 1 | Biological Replicate 1 Only | 1                           |
| P40926     | Malate dehydrogenase, mitochondrial                         | Biological Replicate 2 Only | 1                           |
| P49006     | MARCKS-related protein                                      | Biological Replicate 2 Only | 2                           |
| P30153     | Medium tumor antigen-associated 61 kDa protein              | Biological Replicate 2 Only | 1                           |
| P55145     | Mesencephalic astrocyte-derived neurotrophic factor         | Biological Replicate 1 Only | 1                           |
| Q8N108     | Mesoderm induction early response protein 1                 | Biological Replicate 2 Only | 1                           |
| Q86V40     | Metalloprotease TIK1                                        | Biological Replicate 1 Only | 1                           |
| A6NFA1     | Metalloprotease TIK2                                        | Biological Replicate 1 Only | 1                           |
| Q16891     | MICOS complex subunit MIC60                                 | Biological Replicate 1 Only | 1                           |
| Q9NS69     | Mitochondrial import receptor subunit TOM22 homolog         | Biological 1 and 2          | 2                           |
| P14649     | Myosin light chain 6B                                       | Biological Replicate 2 Only | 1                           |
| P60660     | Myosin light polypeptide 6                                  | Biological Replicate 2 Only | 1                           |
| P35580     | Myosin-10                                                   | Biological Replicate 1 Only | 1                           |
| P35749     | Myosin-11                                                   | Biological Replicate 1 Only | 1                           |
| Q7Z406     | Myosin-14                                                   | Biological Replicate 1 Only | 1                           |
| P35579     | Myosin-9                                                    | Biological Replicate 1 Only | 1                           |
| P35579     | Myosin-9                                                    | Biological 1 and 2          | 2                           |
| P29966     | Myristoylated alanine-rich C-kinase substrate               | Biological Replicate 2 Only | 2                           |
| Q6BCY4     | NADH-cytochrome b5 reductase 2                              | Biological Replicate 2 Only | 1                           |

| Uniprot ID | Protein Name                                      | Biological Replicate        | Number of Modified Peptides |
|------------|---------------------------------------------------|-----------------------------|-----------------------------|
| O95299     | NADH-ubiquinone oxidoreductase 42 kDa subunit     | Biological Replicate 1 Only | 1                           |
| Q9NPH5     | NADPH oxidase 4                                   | Biological Replicate 2 Only | 1                           |
| P20929     | Nebulin                                           | Biological Replicate 2 Only | 1                           |
| O75113     | NEDD4-binding protein 1                           | Biological Replicate 2 Only | 1                           |
| Q9UMX5     | Neudesin                                          | Biological Replicate 2 Only | 1                           |
| Q8NFP9     | Neurobeachin                                      | Biological Replicate 1 Only | 1                           |
| P07197     | Neurofilament medium polypeptide                  | Biological 1 and 2          | 3                           |
| Q01973     | Neurotrophic tyrosine kinase, receptor-related 1  | Biological Replicate 2 Only | 1                           |
| Q15233     | Non-POU domain-containing octamer-binding protein | Biological Replicate 1 Only | 1                           |
| P49321     | Nuclear autoantigenic sperm protein               | Biological Replicate 2 Only | 2                           |
| Q9Y266     | Nuclear migration protein nudC                    | Biological Replicate 2 Only | 1                           |
| P67809     | Nuclease-sensitive element-binding protein 1      | Biological 1 and 2          | 2                           |
| P19338     | Nucleolin                                         | Biological Replicate 1 Only | 1                           |
| P15531     | Nucleoside diphosphate kinase A                   | Biological 1 and 2          | 2                           |
| P22392     | Nucleoside diphosphate kinase B                   | Biological Replicate 2 Only | 1                           |
| Q99733     | Nucleosome assembly protein 1-like 4              | Biological Replicate 2 Only | 1                           |
| Q13415     | Origin recognition complex subunit 1              | Biological Replicate 1 Only | 1                           |
| Q9Y5N6     | Origin recognition complex subunit 6              | Biological Replicate 1 Only | 1                           |
| Q3ZCN5     | Otogelin-like protein                             | Biological Replicate 1 Only | 1                           |
| P17066     | P17066                                            | Biological Replicate 2 Only | 1                           |
| P31946     | P31946                                            | Biological Replicate 2 Only | 1                           |
| Q8IUH4     | Palmitoyltransferase ZDHHC13                      | Biological Replicate 1 Only | 1                           |
| A0A0J9YXQ4 | Paraneoplastic antigen Ma6E                       | Biological Replicate 1 Only | 1                           |
| O75475     | PC4 and SFRS1-interacting protein                 | Biological Replicate 2 Only | 1                           |
| Q96AY3     | Peptidyl-prolyl cis-trans isomerase FKBP10        | Biological 1 and 2          | 2                           |
| O60664     | Perilipin-3                                       | Biological Replicate 2 Only | 1                           |
| Q00G26     | Perilipin-5                                       | Biological Replicate 2 Only | 1                           |
| P41219     | Peripherin                                        | Biological Replicate 1 Only | 1                           |
| Q06830     | Peroxiredoxin-1                                   | Biological 1 and 2          | 2                           |
| Q8NDX1     | PH and SEC7 domain-containing protein 4           | Biological Replicate 2 Only | 1                           |
| Q13371     | Phosducin-like protein                            | Biological Replicate 2 Only | 1                           |

| Uniprot ID | Protein Name                                            | Biological Replicate        | Number of Modified Peptides |
|------------|---------------------------------------------------------|-----------------------------|-----------------------------|
| Q00325     | Phosphate carrier protein, mitochondrial                | Biological Replicate 2 Only | 1                           |
| Q16822     | Phosphoenolpyruvate carboxykinase [GTP]                 | Biological Replicate 2 Only | 1                           |
| P18669     | Phosphoglycerate mutase 1                               | Biological Replicate 2 Only | 1                           |
| P15259     | Phosphoglycerate mutase 2                               | Biological Replicate 2 Only | 1                           |
| Q9NRQ2     | Phospholipid scramblase 4                               | Biological Replicate 1 Only | 1                           |
| Q8NB49     | Phospholipid-transporting ATPase IG                     | Biological Replicate 1 Only | 1                           |
| Q8NC51     | Plasminogen activator inhibitor 1 RNA-binding protein   | Biological Replicate 1 Only | 2                           |
| Q14651     | Plastin-1                                               | Biological Replicate 2 Only | 1                           |
| P13797     | Plastin-3                                               | Biological Replicate 2 Only | 1                           |
| Q9HAU0     | Pleckstrin homology domain-containing family A member 5 | Biological Replicate 2 Only | 1                           |
| Q15365     | Poly(rC)-binding protein 1                              | Biological 1 and 2          | 2                           |
| Q15365     | Poly(rC)-binding protein 1                              | Biological Replicate 1 Only | 1                           |
| Q15366     | Poly(rC)-binding protein 2                              | Biological 1 and 2          | 2                           |
| P57721     | Poly(rC)-binding protein 3                              | Biological 1 and 2          | 2                           |
| Q9UKA9     | Polypyrimidine tract-binding protein 2                  | Biological Replicate 2 Only | 1                           |
| P0CG47     | Polyubiquitin-B                                         | Biological Replicate 2 Only | 1                           |
| P0CG48     | Polyubiquitin-C                                         | Biological Replicate 2 Only | 1                           |
| Q96PR1     | Potassium voltage-gated channel subfamily C member 2    | Biological Replicate 2 Only | 1                           |
| P54707     | Potassium-transporting ATPase alpha chain 2             | Biological Replicate 1 Only | 1                           |
| Q6S8J3     | POTE ankyrin domain family member E                     | Biological Replicate 1 Only | 1                           |
| A5A3E0     | POTE ankyrin domain family member F                     | Biological Replicate 1 Only | 1                           |
| Q13029     | PR domain zinc finger protein 2                         | Biological Replicate 1 Only | 1                           |
| Q7L3T8     | Probable proline--tRNA ligase, mitochondrial            | Biological Replicate 1 Only | 1                           |
| Q9HCU5     | Prolactin regulatory element-binding protein            | Biological Replicate 2 Only | 1                           |
| Q14914     | Prostaglandin reductase 1                               | Biological Replicate 1 Only | 1                           |
| P28066     | Proteasome subunit alpha type-5                         | Biological 1 and 2          | 2                           |
| Q8IVF2     | Protein AHNAK2                                          | Biological Replicate 2 Only | 2                           |
| Q9ULJ1     | Protein BCAP                                            | Biological Replicate 2 Only | 1                           |
| Q9Y2V0     | Protein C15orf41                                        | Biological Replicate 2 Only | 1                           |
| P07237     | Protein disulfide-isomerase                             | Biological 1 and 2          | 3                           |
| P30101     | Protein disulfide-isomerase A3                          | Biological Replicate 2 Only | 1                           |

| Uniprot ID | Protein Name                                         | Biological Replicate        | Number of Modified Peptides |
|------------|------------------------------------------------------|-----------------------------|-----------------------------|
| P13667     | Protein disulfide-isomerase A4                       | Biological Replicate 2 Only | 1                           |
| Q9C005     | Protein dpy-30 homolog                               | Biological Replicate 2 Only | 1                           |
| P49257     | Protein ERGIC-53                                     | Biological Replicate 1 Only | 1                           |
| Q96C01     | Protein FAM136A                                      | Biological Replicate 2 Only | 1                           |
| A8MVW0     | Protein FAM171A2                                     | Biological Replicate 1 Only | 1                           |
| A2RU67     | Protein FAM234B                                      | Biological Replicate 1 Only | 1                           |
| Q92520     | Protein FAM3C                                        | Biological Replicate 2 Only | 1                           |
| Q8N8X9     | Protein mab-21-like 3                                | Biological Replicate 2 Only | 1                           |
| P61244     | Protein max                                          | Biological Replicate 1 Only | 1                           |
| Q460N3     | Protein mono-ADP-ribosyltransferase PARP15           | Biological Replicate 1 Only | 1                           |
| Q14160     | Protein scribble homolog                             | Biological Replicate 1 Only | 1                           |
| Q9Y5U2     | Protein TSSC4                                        | Biological Replicate 2 Only | 1                           |
| P49221     | Protein-glutamine gamma-glutamyltransferase 4        | Biological Replicate 1 Only | 1                           |
| Q9BYX7     | Putative beta-actin-like protein 3                   | Biological Replicate 1 Only | 1                           |
| Q5VTE0     | Putative elongation factor 1-alpha-like 3            | Biological Replicate 1 Only | 1                           |
| P48741     | Putative heat shock 70 kDa protein 7                 | Biological 1 and 2          | 2                           |
| Q58FG1     | Putative heat shock protein HSP 90-alpha A4          | Biological Replicate 2 Only | 1                           |
| Q58FG1     | Putative heat shock protein HSP 90-alpha A4          | Biological Replicate 1 Only | 1                           |
| Q58FF8     | Putative heat shock protein HSP 90-beta 2            | Biological Replicate 2 Only | 1                           |
| Q58FF6     | Putative heat shock protein HSP 90-beta 4            | Biological Replicate 2 Only | 1                           |
| Q58FF7     | Putative heat shock protein HSP 90-beta-3            | Biological 1 and 2          | 2                           |
| Q6P575     | Putative inactive beta-glucuronidase protein GUSBP11 | Biological Replicate 2 Only | 1                           |
| A6NCN2     | Putative keratin-87 protein                          | Biological Replicate 2 Only | 1                           |
| O60361     | Putative nucleoside diphosphate kinase               | Biological Replicate 2 Only | 1                           |
| Q92928     | Putative Ras-related protein Rab-1C                  | Biological Replicate 1 Only | 1                           |
| Q495Z4     | Putative uncharacterized protein ASB16-AS1           | Biological Replicate 1 Only | 1                           |
| Q5TG92     | Putative uncharacterized protein C1orf195            | Biological Replicate 2 Only | 1                           |
| Q6ZRU5     | Putative uncharacterized protein FLJ46089            | Biological Replicate 1 Only | 1                           |
| Q9P2R3     | Rabankyrin-5                                         | Biological Replicate 2 Only | 1                           |
| P43487     | Ran-specific GTPase-activating protein               | Biological Replicate 2 Only | 1                           |
| P46940     | Ras GTPase-activating-like protein IQGAP1            | Biological Replicate 2 Only | 1                           |

| Uniprot ID | Protein Name                                             | Biological Replicate        | Number of Modified Peptides |
|------------|----------------------------------------------------------|-----------------------------|-----------------------------|
| Q13576     | Ras GTPase-activating-like protein IQGAP2                | Biological Replicate 1 Only | 1                           |
| Q86VI3     | Ras GTPase-activating-like protein IQGAP3                | Biological Replicate 1 Only | 1                           |
| P62820     | Ras-related protein Rab-1A                               | Biological Replicate 2 Only | 1                           |
| Q9H0U4     | Ras-related protein Rab-1B                               | Biological Replicate 1 Only | 1                           |
| Q86X27     | Ras-specific guanine nucleotide-releasing factor RalGPS2 | Biological Replicate 1 Only | 1                           |
| P10586     | Receptor-type tyrosine-protein phosphatase F             | Biological Replicate 2 Only | 1                           |
| O43307     | Rho guanine nucleotide exchange factor 9                 | Biological Replicate 2 Only | 1                           |
| A6NIN4     | RING finger protein 227                                  | Biological Replicate 2 Only | 1                           |
| Q9H0A0     | RNA cytidine acetyltransferase                           | Biological Replicate 2 Only | 1                           |
| Q9Y5S9     | RNA-binding protein 8A                                   | Biological Replicate 1 Only | 1                           |
| Q01844     | RNA-binding protein EWS                                  | Biological Replicate 2 Only | 1                           |
| P35637     | RNA-binding protein FUS                                  | Biological Replicate 1 Only | 1                           |
| Q92736     | Ryanodine receptor 2                                     | Biological Replicate 1 Only | 1                           |
| Q15413     | Ryanodine receptor 3                                     | Biological Replicate 1 Only | 1                           |
| Q15413     | Ryanodine receptor 3                                     | Biological 1 and 2          | 2                           |
| O43865     | S-adenosylhomocysteine hydrolase-like protein 1          | Biological Replicate 1 Only | 1                           |
| Q9NSI8     | SAM domain-containing protein SAMSN-1                    | Biological Replicate 2 Only | 1                           |
| Q6UWB4     | Serine protease 55                                       | Biological Replicate 1 Only | 1                           |
| Q8TDC3     | Serine/threonine-protein kinase BRSK1                    | Biological Replicate 1 Only | 1                           |
| Q8IWK3     | Serine/threonine-protein kinase BRSK2                    | Biological Replicate 1 Only | 1                           |
| Q9Y5S2     | Serine/threonine-protein kinase MRCK beta                | Biological 1 and 2          | 2                           |
| Q9H4A3     | Serine/threonine-protein kinase WNK1                     | Biological Replicate 1 Only | 1                           |
| Q9BYP7     | Serine/threonine-protein kinase WNK3                     | Biological Replicate 2 Only | 1                           |
| P50454     | Serpin H1                                                | Biological Replicate 2 Only | 1                           |
| P11831     | Serum response factor                                    | Biological Replicate 1 Only | 1                           |
| Q9Y3L3     | SH3 domain-binding protein 1                             | Biological Replicate 2 Only | 2                           |
| A0MZ66     | Shootin-1                                                | Biological Replicate 2 Only | 1                           |
| P62306     | Small nuclear ribonucleoprotein F                        | Biological Replicate 1 Only | 1                           |
| P62316     | Small nuclear ribonucleoprotein Sm D2                    | Biological Replicate 2 Only | 1                           |
| A6NHR9     | SMC hinge domain-containing protein 1                    | Biological Replicate 1 Only | 1                           |
| Q07890     | Son of sevenless homolog 2                               | Biological Replicate 2 Only | 1                           |

| Uniprot ID | Protein Name                                    | Biological Replicate        | Number of Modified Peptides |
|------------|-------------------------------------------------|-----------------------------|-----------------------------|
| Q9H3E2     | Sorting nexin-25                                | Biological Replicate 2 Only | 1                           |
| Q9Y5X3     | Sorting nexin-5                                 | Biological Replicate 1 Only | 1                           |
| Q9Y4P9     | Sperm flagellar protein 1                       | Biological Replicate 1 Only | 1                           |
| Q15459     | Splicing factor 3A subunit 1                    | Biological 1 and 2          | 2                           |
| P23246     | Splicing factor, proline- and glutamine-rich    | Biological Replicate 1 Only | 1                           |
| Q9P2P6     | StAR-related lipid transfer protein 9           | Biological Replicate 2 Only | 1                           |
| P38646     | Stress-70 protein, mitochondrial                | Biological Replicate 2 Only | 4                           |
| P31948     | Stress-induced-phosphoprotein 1                 | Biological Replicate 2 Only | 1                           |
| O95347     | Structural maintenance of chromosomes protein 2 | Biological Replicate 1 Only | 1                           |
| P78524     | Suppression of tumorigenicity 5 protein         | Biological Replicate 2 Only | 1                           |
| O15056     | Synaptojanin-2                                  | Biological Replicate 2 Only | 1                           |
| O95721     | Synaptosomal-associated protein 29              | Biological Replicate 2 Only | 1                           |
| O15061     | Synemin                                         | Biological Replicate 2 Only | 2                           |
| Q96DN5     | TBC1 domain family member 31                    | Biological Replicate 1 Only | 1                           |
| O95759     | TBC1 domain family member 8                     | Biological Replicate 1 Only | 1                           |
| P50991     | T-complex protein 1 subunit delta               | Biological Replicate 2 Only | 1                           |
| P40227     | T-complex protein 1 subunit zeta                | Biological Replicate 1 Only | 1                           |
| Q92526     | T-complex protein 1 subunit zeta-2              | Biological Replicate 1 Only | 1                           |
| Q8WWU5     | T-complex protein 11 homolog                    | Biological Replicate 2 Only | 1                           |
| Q2MV58     | Tectonic-1                                      | Biological Replicate 1 Only | 1                           |
| Q9BXT5     | Testis-expressed protein 15                     | Biological Replicate 2 Only | 1                           |
| Q96AE7     | Tetratricopeptide repeat protein 17             | Biological Replicate 2 Only | 1                           |
| Q6NT89     | TMF-regulated nuclear protein 1                 | Biological Replicate 1 Only | 1                           |
| Q9ULX9     | Transcription factor MafF                       | Biological Replicate 2 Only | 1                           |
| Q3SY56     | Transcription factor Sp6                        | Biological Replicate 2 Only | 1                           |
| Q13263     | Transcription intermediary factor 1-beta        | Biological Replicate 2 Only | 1                           |
| P46100     | Transcriptional regulator ATRX                  | Biological Replicate 1 Only | 1                           |
| P62995     | Transformer-2 protein homolog beta              | Biological Replicate 1 Only | 1                           |
| P37802     | Transgelin-2                                    | Biological Replicate 1 Only | 1                           |
| P37802     | Transgelin-2                                    | Biological Replicate 2 Only | 3                           |
| Q9UI15     | Transgelin-3                                    | Biological Replicate 1 Only | 1                           |



| Uniprot ID | Protein Name                                                     | Biological Replicate        | Number of Modified Peptides |
|------------|------------------------------------------------------------------|-----------------------------|-----------------------------|
| Q9Y5S1     | Transient receptor potential cation channel subfamily V member 2 | Biological Replicate 2 Only | 1                           |
| P57088     | Transmembrane protein 33                                         | Biological Replicate 1 Only | 1                           |
| Q9GZU3     | Transmembrane protein 39B                                        | Biological Replicate 2 Only | 1                           |
| Q9NUR3     | Transmembrane protein 74B                                        | Biological Replicate 1 Only | 1                           |
| Q9P0T7     | Transmembrane protein 9                                          | Biological Replicate 2 Only | 1                           |
| P07478     | Trypsin-2                                                        | Biological Replicate 1 Only | 1                           |
| P68366     | Tubulin alpha-4A chain                                           | Biological Replicate 1 Only | 1                           |
| A6NNZ2     | Tubulin beta 8B                                                  | Biological 1 and 2          | 3                           |
| P07437     | Tubulin beta chain                                               | Biological 1 and 2          | 7                           |
| Q9H4B7     | Tubulin beta-1 chain                                             | Biological 1 and 2          | 2                           |
| Q13885     | Tubulin beta-2A chain                                            | Biological 1 and 2          | 6                           |
| Q9BVA1     | Tubulin beta-2B chain                                            | Biological 1 and 2          | 6                           |
| Q13509     | Tubulin beta-3 chain                                             | Biological 1 and 2          | 4                           |
| Q13509     | Tubulin beta-3 chain                                             | Biological 1 and 2          | 2                           |
| P04350     | Tubulin beta-4A chain                                            | Biological 1 and 2          | 5                           |
| P04350     | Tubulin beta-4A chain                                            | Biological 1 and 2          | 3                           |
| P68371     | Tubulin beta-4B chain                                            | Biological 1 and 2          | 8                           |
| Q9BUF5     | Tubulin beta-6 chain                                             | Biological 1 and 2          | 3                           |
| Q3ZCM7     | Tubulin beta-8 chain                                             | Biological 1 and 2          | 5                           |
| P55327     | Tumor protein D52                                                | Biological Replicate 2 Only | 1                           |
| P07101     | Tyrosine 3-monooxygenase                                         | Biological Replicate 2 Only | 1                           |
| Q9UMX0     | Ubiquilin-1                                                      | Biological Replicate 2 Only | 1                           |
| Q9UHD9     | Ubiquilin-2                                                      | Biological Replicate 2 Only | 1                           |
| Q9NRR5     | Ubiquilin-4                                                      | Biological Replicate 2 Only | 1                           |
| O75317     | Ubiquitin carboxyl-terminal hydrolase 12                         | Biological Replicate 2 Only | 1                           |
| Q9Y5T5     | Ubiquitin carboxyl-terminal hydrolase 16                         | Biological Replicate 2 Only | 1                           |
| C9JJH3     | Ubiquitin carboxyl-terminal hydrolase 17-like protein 10         | Biological Replicate 1 Only | 1                           |
| Q96K76     | Ubiquitin carboxyl-terminal hydrolase 47                         | Biological Replicate 2 Only | 1                           |
| P62979     | Ubiquitin-40S ribosomal protein S27a                             | Biological Replicate 2 Only | 1                           |
| P62987     | Ubiquitin-60S ribosomal protein L40                              | Biological Replicate 2 Only | 1                           |
| Q15819     | Ubiquitin-conjugating enzyme E2 variant 2                        | Biological Replicate 2 Only | 1                           |

| Uniprot ID | Protein Name                                           | Biological Replicate        | Number of Modified Peptides |
|------------|--------------------------------------------------------|-----------------------------|-----------------------------|
| P22314     | Ubiquitin-like modifier-activating enzyme 1            | Biological Replicate 1 Only | 2                           |
| Q68DL7     | Uncharacterized protein C18orf63                       | Biological Replicate 1 Only | 1                           |
| Q5T230     | Undifferentiated embryonic cell transcription factor 1 | Biological Replicate 1 Only | 1                           |
| O95399     | Urotensin-2                                            | Biological Replicate 2 Only | 1                           |
| O75379     | Vesicle-associated membrane protein 4                  | Biological Replicate 2 Only | 1                           |
| P08670     | Vimentin                                               | Biological Replicate 1 Only | 3                           |
| P18206     | Vinculin                                               | Biological Replicate 2 Only | 1                           |
| P04275     | von Willebrand factor                                  | Biological Replicate 1 Only | 2                           |
| O00534     | von Willebrand factor A domain-containing protein 5A   | Biological Replicate 1 Only | 1                           |
| P10073     | Zinc finger and SCAN domain-containing protein 22      | Biological Replicate 2 Only | 1                           |
| Q8WYQ9     | Zinc finger CCHC domain-containing protein 14          | Biological Replicate 1 Only | 1                           |
| P52740     | Zinc finger protein 132                                | Biological Replicate 1 Only | 1                           |
| Q86Y25     | Zinc finger protein 354C                               | Biological Replicate 1 Only | 1                           |
| Q9BX82     | Zinc finger protein 471                                | Biological Replicate 1 Only | 1                           |
| Q96MX3     | Zinc finger protein 48                                 | Biological Replicate 2 Only | 1                           |
| Q96CX3     | Zinc finger protein 501                                | Biological Replicate 2 Only | 1                           |
| Q9C0D4     | Zinc finger protein 518B                               | Biological Replicate 1 Only | 1                           |
| Q86UE3     | Zinc finger protein 546                                | Biological Replicate 2 Only | 1                           |
| Q5JPB2     | Zinc finger protein 831                                | Biological Replicate 2 Only | 1                           |
| Q96IR2     | Zinc finger protein 845                                | Biological Replicate 1 Only | 1                           |
| P0CJ79     | Zinc finger protein 888                                | Biological Replicate 1 Only | 1                           |
| Q13129     | Zinc finger protein Rlf                                | Biological Replicate 2 Only | 1                           |

**Table S4.** IC-FPOP oxidatively modified proteins in 100 mM H<sub>2</sub>O<sub>2</sub> PIXY

| Uniprot ID | Protein Name                                                      | Biological Replicate        | Number of Modified Peptides |
|------------|-------------------------------------------------------------------|-----------------------------|-----------------------------|
| P61604     | 10 kDa heat shock protein, mitochondrial                          | Biological Replicate 1 Only | 2                           |
| P31946     | 14-3-3 protein beta/alpha                                         | Biological Replicate 1 Only | 1                           |
| P31946     | 14-3-3 protein beta/alpha                                         | Biological Replicate 1 Only | 2                           |
| P62258     | 14-3-3 protein epsilon                                            | Biological 1 and 2          | 5                           |
| P61978     | 14-3-3 protein epsilon                                            | Biological 1 and 2          | 4                           |
| P27348     | 14-3-3 protein theta                                              | Biological Replicate 1 Only | 1                           |
| P27348     | 14-3-3 protein theta                                              | Biological Replicate 1 Only | 2                           |
| P63104     | 14-3-3 protein zeta/delta                                         | Biological 1 and 2          | 5                           |
| Q99460     | 26S proteasome non-ATPase regulatory subunit 1                    | Biological Replicate 2 Only | 1                           |
| O43242     | 26S proteasome non-ATPase regulatory subunit 3                    | Biological Replicate 2 Only | 1                           |
| P17980     | 26S proteasome regulatory subunit 6A                              | Biological Replicate 1 Only | 3                           |
| P62195     | 26S proteasome regulatory subunit 8                               | Biological Replicate 1 Only | 1                           |
| P82921     | 28S ribosomal protein S21, mitochondrial                          | Biological Replicate 1 Only | 1                           |
| P52815     | 39S ribosomal protein L12, mitochondrial                          | Biological Replicate 2 Only | 1                           |
| P31937     | 3-hydroxyisobutyrate dehydrogenase, mitochondrial                 | Biological Replicate 1 Only | 1                           |
| P62263     | 40S ribosomal protein S14                                         | Biological Replicate 1 Only | 2                           |
| P62841     | 40S ribosomal protein S15                                         | Biological Replicate 1 Only | 1                           |
| P08708     | 40S ribosomal protein S17                                         | Biological Replicate 1 Only | 1                           |
| P38159     | 40S ribosomal protein S19                                         | Biological Replicate 1 Only | 2                           |
| P63220     | 40S ribosomal protein S21                                         | Biological 1 and 2          | 3                           |
| P62854     | 40S ribosomal protein S26                                         | Biological 1 and 2          | 2                           |
| P62857     | 40S ribosomal protein S28                                         | Biological Replicate 1 Only | 1                           |
| P61247     | 40S ribosomal protein S3a                                         | Biological Replicate 2 Only | 1                           |
| P62753     | 40S ribosomal protein S6                                          | Biological Replicate 2 Only | 1                           |
| P22557     | 5-aminolevulinic acid synthase, erythroid-specific, mitochondrial | Biological Replicate 2 Only | 1                           |
| P10809     | 60 kDa heat shock protein, mitochondrial                          | Biological Replicate 1 Only | 4                           |
| P05386     | 60S acidic ribosomal protein P1                                   | Biological 1 and 2          | 2                           |
| P05387     | 60S acidic ribosomal protein P2                                   | Biological Replicate 2 Only | 1                           |
| P05387     | 60S acidic ribosomal protein P2                                   | Biological 1 and 2          | 2                           |
| P26373     | 60S ribosomal protein L13                                         | Biological Replicate 2 Only | 1                           |

| Uniprot ID | Protein Name                                                          | Biological Replicate        | Number of Modified Peptides |
|------------|-----------------------------------------------------------------------|-----------------------------|-----------------------------|
| P83731     | 60S ribosomal protein L24                                             | Biological 1 and 2          | 2                           |
| P47914     | 60S ribosomal protein L29                                             | Biological Replicate 1 Only | 1                           |
| P39687     | Acidic leucine-rich nuclear phosphoprotein 32 family member A         | Biological Replicate 1 Only | 1                           |
| P39019     | Acidic leucine-rich nuclear phosphoprotein 32 family member A         | Biological Replicate 1 Only | 1                           |
| Q92688     | Acidic leucine-rich nuclear phosphoprotein 32 family member B         | Biological Replicate 1 Only | 1                           |
| Q9BTT0     | Acidic leucine-rich nuclear phosphoprotein 32 family member E         | Biological Replicate 2 Only | 1                           |
| Q8N556     | Actin filament-associated protein 1                                   | Biological 1 and 2          | 2                           |
| P68032     | Actin, alpha cardiac muscle 1                                         | Biological 1 and 2          | 9                           |
| P68133     | Actin, alpha skeletal muscle                                          | Biological 1 and 2          | 9                           |
| P62736     | Actin, aortic smooth muscle                                           | Biological 1 and 2          | 8                           |
| P60709     | Actin, cytoplasmic 1                                                  | Biological 1 and 2          | 9                           |
| P63261     | Actin, cytoplasmic 2                                                  | Biological 1 and 2          | 14                          |
| P63267     | Actin, gamma-enteric smooth muscle                                    | Biological Replicate 1 Only | 2                           |
| P63267     | Actin, gamma-enteric smooth muscle                                    | Biological 1 and 2          | 6                           |
| O96019     | Actin-like protein 6A                                                 | Biological Replicate 1 Only | 1                           |
| Q9H568     | Actin-like protein 8                                                  | Biological Replicate 2 Only | 1                           |
| P53999     | Activated RNA polymerase II transcriptional coactivator p15           | Biological 1 and 2          | 2                           |
| O14561     | Acyl carrier protein, mitochondrial                                   | Biological 1 and 2          | 2                           |
| P07108     | Acyl-CoA-binding protein                                              | Biological Replicate 2 Only | 1                           |
| Q5H913     | ADP-ribosylation factor-like protein 13A                              | Biological Replicate 2 Only | 1                           |
| Q99996     | A-kinase anchor protein 9                                             | Biological Replicate 1 Only | 1                           |
| P02765     | Alpha-2-HS-glycoprotein                                               | Biological Replicate 1 Only | 1                           |
| P35609     | Alpha-actinin-2                                                       | Biological Replicate 1 Only | 1                           |
| O43707     | Alpha-actinin-4                                                       | Biological Replicate 1 Only | 3                           |
| O43768     | Alpha-endosulfine                                                     | Biological Replicate 2 Only | 1                           |
| P02771     | Alpha-fetoprotein                                                     | Biological 1 and 2          | 3                           |
| P40222     | Alpha-taxilin                                                         | Biological Replicate 1 Only | 1                           |
| Q12904     | Aminoacyl tRNA synthase complex-interacting multifunctional protein 1 | Biological Replicate 1 Only | 1                           |
| P09525     | Annexin A4                                                            | Biological Replicate 2 Only | 1                           |
| Q03519     | Antigen peptide transporter 2                                         | Biological Replicate 2 Only | 1                           |
| P01008     | Antithrombin-III                                                      | Biological Replicate 2 Only | 1                           |

| Uniprot ID | Protein Name                                                  | Biological Replicate        | Number of Modified Peptides |
|------------|---------------------------------------------------------------|-----------------------------|-----------------------------|
| O94973     | AP-2 complex subunit alpha-2                                  | Biological Replicate 2 Only | 1                           |
| P04114     | Apolipoprotein B-100                                          | Biological Replicate 1 Only | 1                           |
| Q07812     | Apoptosis regulator BAX                                       | Biological 1 and 2          | 3                           |
| P11511     | Aromatase                                                     | Biological Replicate 2 Only | 1                           |
| A6NEK1     | Arrestin domain-containing protein 5                          | Biological Replicate 2 Only | 1                           |
| P06576     | ATP synthase subunit beta, mitochondrial                      | Biological 1 and 2          | 5                           |
| O75947     | ATP synthase subunit d, mitochondrial                         | Biological Replicate 1 Only | 1                           |
| P18859     | ATP synthase-coupling factor 6, mitochondrial                 | Biological Replicate 1 Only | 1                           |
| Q96J66     | ATP-binding cassette sub-family C member 11                   | Biological Replicate 1 Only | 1                           |
| Q16740     | ATP-dependent Clp protease proteolytic subunit, mitochondrial | Biological 1 and 2          | 2                           |
| O00571     | ATP-dependent RNA helicase DDX3X                              | Biological Replicate 2 Only | 1                           |
| O15523     | ATP-dependent RNA helicase DDX3Y                              | Biological Replicate 2 Only | 1                           |
| Q81VW6     | AT-rich interactive domain-containing protein 3B              | Biological Replicate 2 Only | 1                           |
| Q96BY7     | Autophagy-related protein 2 homolog B                         | Biological Replicate 2 Only | 1                           |
| Q8N183     | B17.2L                                                        | Biological Replicate 1 Only | 1                           |
| Q9P281     | BAH and coiled-coil domain-containing protein 1               | Biological Replicate 1 Only | 1                           |
| O75531     | Barrier-to-autointegration factor                             | Biological Replicate 1 Only | 1                           |
| P35613     | Basigin                                                       | Biological 1 and 2          | 2                           |
| Q4VC05     | B-cell CLL/lymphoma 7 protein family member A                 | Biological Replicate 1 Only | 1                           |
| P51572     | B-cell receptor-associated protein 31                         | Biological 1 and 2          | 2                           |
| Q9NYF8     | Bcl-2-associated transcription factor 1                       | Biological Replicate 1 Only | 1                           |
| Q562R1     | Beta-actin-like protein 2                                     | Biological 1 and 2          | 2                           |
| Q8NCI6     | Beta-galactosidase-1-like protein 3                           | Biological Replicate 1 Only | 1                           |
| P55957     | BH3-interacting domain death agonist                          | Biological Replicate 1 Only | 1                           |
| P07814     | Bifunctional glutamate/proline--tRNA ligase                   | Biological Replicate 1 Only | 1                           |
| P80723     | Brain acid soluble protein 1                                  | Biological 1 and 2          | 4                           |
| Q96CX2     | BTB/POZ domain-containing protein KCTD12                      | Biological Replicate 1 Only | 1                           |
| P27708     | CAD protein                                                   | Biological Replicate 2 Only | 1                           |
| Q9HB71     | Calcyclin-binding protein                                     | Biological Replicate 2 Only | 2                           |
| P0DP25     | Calmodulin-3                                                  | Biological Replicate 2 Only | 3                           |
| P27824     | Calnexin                                                      | Biological 1 and 2          | 4                           |

| Uniprot ID | Protein Name                                              | Biological Replicate        | Number of Modified Peptides |
|------------|-----------------------------------------------------------|-----------------------------|-----------------------------|
| P20810     | Calpastatin                                               | Biological Replicate 2 Only | 1                           |
| Q15417     | Calponin-3                                                | Biological 1 and 2          | 2                           |
| P27797     | Calreticulin                                              | Biological 1 and 2          | 4                           |
| O43852     | Calumenin                                                 | Biological 1 and 2          | 6                           |
| P56211     | cAMP-regulated phosphoprotein 19                          | Biological Replicate 2 Only | 1                           |
| P78358     | Cancer/testis antigen 1                                   | Biological Replicate 2 Only | 1                           |
| O75638     | Cancer/testis antigen 2                                   | Biological Replicate 2 Only | 1                           |
| Q14444     | Caprin-1                                                  | Biological Replicate 1 Only | 1                           |
| P16152     | Carbonyl reductase                                        | Biological Replicate 2 Only | 1                           |
| O75976     | Carboxypeptidase D                                        | Biological Replicate 1 Only | 1                           |
| P07339     | Cathepsin D                                               | Biological Replicate 2 Only | 1                           |
| Q96F85     | CB1 cannabinoid receptor-interacting protein 1            | Biological Replicate 2 Only | 1                           |
| Q92600     | CCR4-NOT transcription complex subunit 9                  | Biological Replicate 2 Only | 1                           |
| Q00587     | Cdc42 effector protein 1                                  | Biological Replicate 1 Only | 1                           |
| O15182     | Centrin-3                                                 | Biological Replicate 1 Only | 1                           |
| Q8N137     | Centrobin                                                 | Biological Replicate 2 Only | 1                           |
| P49454     | Centromere protein F                                      | Biological Replicate 1 Only | 1                           |
| Q9C0D2     | Centrosomal protein of 295 kDa                            | Biological Replicate 2 Only | 1                           |
| O43633     | Charged multivesicular body protein 2a                    | Biological Replicate 1 Only | 1                           |
| Q9H444     | Charged multivesicular body protein 4b                    | Biological Replicate 1 Only | 1                           |
| Q8TDX6     | Chondroitin sulfate N-acetylgalactosaminyltransferase 1   | Biological Replicate 1 Only | 1                           |
| Q13111     | Chromatin assembly factor 1 subunit A                     | Biological Replicate 1 Only | 1                           |
| Q8IXM2     | Chromatin complexes subunit BAP18                         | Biological Replicate 1 Only | 1                           |
| Q9Y3Y2     | Chromatin target of PRMT1 protein                         | Biological 1 and 2          | 2                           |
| Q8TBY9     | Cilia- and flagella-associated protein 251                | Biological Replicate 2 Only | 1                           |
| Q14677     | Clathrin interactor 1                                     | Biological Replicate 2 Only | 1                           |
| Q16630     | Cleavage and polyadenylation specificity factor subunit 6 | Biological 1 and 2          | 2                           |
| P33240     | Cleavage stimulation factor subunit 2                     | Biological Replicate 1 Only | 1                           |
| Q9H0L4     | Cleavage stimulation factor subunit 2 tau variant         | Biological Replicate 1 Only | 2                           |
| P00451     | Coagulation factor VIII                                   | Biological Replicate 2 Only | 1                           |
| P23528     | Cofilin-1                                                 | Biological Replicate 2 Only | 3                           |

| Uniprot ID | Protein Name                                            | Biological Replicate        | Number of Modified Peptides |
|------------|---------------------------------------------------------|-----------------------------|-----------------------------|
| Q9Y281     | Cofilin-2                                               | Biological Replicate 2 Only | 1                           |
| Q16204     | Coiled-coil domain-containing protein 6                 | Biological Replicate 1 Only | 1                           |
| P02452     | Collagen alpha-1                                        | Biological 1 and 2          | 2                           |
| P02458     | Collagen alpha-1                                        | Biological Replicate 2 Only | 1                           |
| P12107     | Collagen alpha-1                                        | Biological Replicate 1 Only | 1                           |
| Q9BXS0     | Collagen alpha-1                                        | Biological Replicate 1 Only | 1                           |
| Q07021     | Complement component 1 Q subcomponent-binding protein   | Biological Replicate 2 Only | 4                           |
| Q9BXR6     | Complement factor H-related protein 5                   | Biological Replicate 1 Only | 1                           |
| Q9NX14     | Complex I-ESSS                                          | Biological Replicate 1 Only | 1                           |
| P42695     | Condensin-2 complex subunit D3                          | Biological Replicate 1 Only | 1                           |
| Q86X12     | Condensin-2 complex subunit G2                          | Biological Replicate 2 Only | 1                           |
| Q9H9Q2     | COP9 signalosome complex subunit 7b                     | Biological Replicate 1 Only | 1                           |
| P78310     | Coxsackievirus and adenovirus receptor                  | Biological Replicate 1 Only | 1                           |
| P12277     | Creatine kinase B-type                                  | Biological 1 and 2          | 3                           |
| P12532     | Creatine kinase U-type, mitochondrial                   | Biological Replicate 2 Only | 1                           |
| Q00536     | Cyclin-dependent kinase 16                              | Biological Replicate 2 Only | 1                           |
| Q00537     | Cyclin-dependent kinase 17                              | Biological Replicate 2 Only | 1                           |
| O60563     | Cyclin-T1                                               | Biological Replicate 2 Only | 1                           |
| Q16527     | Cysteine and glycine-rich protein 2                     | Biological Replicate 1 Only | 1                           |
| P49589     | Cysteine--tRNA ligase, cytoplasmic                      | Biological Replicate 1 Only | 1                           |
| O43169     | Cytochrome b5 type B                                    | Biological Replicate 2 Only | 1                           |
| P31930     | Cytochrome b-c1 complex subunit 1, mitochondrial        | Biological Replicate 2 Only | 1                           |
| P00403     | Cytochrome c oxidase subunit 2                          | Biological Replicate 1 Only | 1                           |
| P13073     | Cytochrome c oxidase subunit 4 isoform 1, mitochondrial | Biological 1 and 2          | 3                           |
| P20674     | Cytochrome c oxidase subunit 5A, mitochondrial          | Biological 1 and 2          | 2                           |
| P08574     | Cytochrome c1, heme protein, mitochondrial              | Biological Replicate 2 Only | 1                           |
| Q14204     | Cytoplasmic dynein 1 heavy chain 1                      | Biological Replicate 2 Only | 1                           |
| O43639     | Cytoplasmic protein NCK2                                | Biological Replicate 1 Only | 1                           |
| Q07065     | Cytoskeleton-associated protein 4                       | Biological Replicate 1 Only | 3                           |
| Q8NFI3     | Cytosolic endo-beta-N-acetylglucosaminidase             | Biological Replicate 2 Only | 1                           |
| Q5BKZ1     | DBIRD complex subunit ZNF326                            | Biological 1 and 2          | 2                           |

| Uniprot ID | Protein Name                                                  | Biological Replicate        | Number of Modified Peptides |
|------------|---------------------------------------------------------------|-----------------------------|-----------------------------|
| Q13011     | Delta                                                         | Biological Replicate 1 Only | 1                           |
| P17661     | Desmin                                                        | Biological Replicate 1 Only | 1                           |
| P17661     | Desmin                                                        | Biological Replicate 1 Only | 1                           |
| Q02413     | Desmoglein-1                                                  | Biological Replicate 2 Only | 2                           |
| Q13443     | Disintegrin and metalloproteinase domain-containing protein 9 | Biological Replicate 1 Only | 1                           |
| Q9Y485     | DmX-like protein 1                                            | Biological Replicate 1 Only | 1                           |
| Q16531     | DNA damage-binding protein 1                                  | Biological Replicate 2 Only | 1                           |
| P18858     | DNA ligase 1                                                  | Biological Replicate 1 Only | 1                           |
| Q07864     | DNA polymerase epsilon catalytic subunit A                    | Biological Replicate 2 Only | 1                           |
| Q9NRF9     | DNA polymerase epsilon subunit 3                              | Biological Replicate 1 Only | 1                           |
| P11387     | DNA topoisomerase 1                                           | Biological Replicate 2 Only | 1                           |
| O15446     | DNA-directed RNA polymerase I subunit RPA34                   | Biological Replicate 1 Only | 1                           |
| Q9UBS4     | DnaJ homolog subfamily B member 11                            | Biological Replicate 1 Only | 1                           |
| Q99615     | DnaJ homolog subfamily C member 7                             | Biological Replicate 1 Only | 2                           |
| O60216     | Double-strand-break repair protein rad21 homolog              | Biological Replicate 1 Only | 1                           |
| P78563     | Double-stranded RNA-specific editase 1                        | Biological Replicate 2 Only | 1                           |
| Q9H1R2     | Dual specificity protein phosphatase 15                       | Biological Replicate 2 Only | 1                           |
| Q13561     | Dynactin subunit 2                                            | Biological Replicate 2 Only | 1                           |
| Q9HCE7     | E3 ubiquitin-protein ligase SMURF1                            | Biological Replicate 2 Only | 1                           |
| Q9HAU4     | E3 ubiquitin-protein ligase SMURF2                            | Biological Replicate 2 Only | 1                           |
| Q14669     | E3 ubiquitin-protein ligase TRIP12                            | Biological Replicate 2 Only | 1                           |
| Q8IUD2     | ELKS/Rab6-interacting/CAST family member 1                    | Biological Replicate 2 Only | 1                           |
| P68104     | Elongation factor 1-alpha 1                                   | Biological Replicate 2 Only | 1                           |
| P24534     | Elongation factor 1-beta                                      | Biological Replicate 1 Only | 1                           |
| P29692     | Elongation factor 1-delta                                     | Biological Replicate 2 Only | 2                           |
| P13639     | Elongation factor 2                                           | Biological Replicate 2 Only | 2                           |
| P13639     | Elongation factor 2                                           | Biological Replicate 2 Only | 2                           |
| Q8N8Q3     | Endonuclease V                                                | Biological Replicate 1 Only | 1                           |
| Q99962     | Endophilin-A1                                                 | Biological Replicate 1 Only | 1                           |
| P11021     | Endoplasmic reticulum chaperone BiP                           | Biological 1 and 2          | 6                           |
| P11021     | Endoplasmic reticulum chaperone BiP                           | Biological 1 and 2          | 2                           |



| Uniprot ID | Protein Name                                                         | Biological Replicate        | Number of Modified Peptides |
|------------|----------------------------------------------------------------------|-----------------------------|-----------------------------|
| Q9BS26     | Endoplasmic reticulum resident protein 44                            | Biological 1 and 2          | 2                           |
| P14625     | Endoplasmin                                                          | Biological 1 and 2          | 7                           |
| P42892     | Endothelin-converting enzyme 1                                       | Biological Replicate 2 Only | 1                           |
| Q92556     | Engulfment and cell motility protein 1                               | Biological Replicate 1 Only | 1                           |
| P84090     | Enhancer of rudimentary homolog                                      | Biological Replicate 1 Only | 1                           |
| Q9Y6I3     | Epsin-1                                                              | Biological Replicate 1 Only | 1                           |
| P27105     | Erythrocyte band 7 integral membrane protein                         | Biological Replicate 1 Only | 1                           |
| P03372     | Estrogen receptor                                                    | Biological Replicate 2 Only | 1                           |
| P60842     | Eukaryotic initiation factor 4A-I                                    | Biological Replicate 2 Only | 1                           |
| P05198     | Eukaryotic translation initiation factor 2 subunit 1                 | Biological Replicate 2 Only | 1                           |
| Q14152     | Eukaryotic translation initiation factor 3 subunit A                 | Biological Replicate 2 Only | 1                           |
| O00303     | Eukaryotic translation initiation factor 3 subunit F                 | Biological Replicate 1 Only | 2                           |
| Q13347     | Eukaryotic translation initiation factor 3 subunit I                 | Biological Replicate 2 Only | 1                           |
| Q13541     | Eukaryotic translation initiation factor 4E-binding protein 1        | Biological Replicate 1 Only | 1                           |
| O60841     | Eukaryotic translation initiation factor 5B                          | Biological Replicate 2 Only | 1                           |
| Q9Y2L1     | Exosome complex exonuclease RRP44                                    | Biological Replicate 2 Only | 1                           |
| P55060     | Exportin-2                                                           | Biological Replicate 2 Only | 1                           |
| Q9Y5B9     | FACT complex subunit SPT16                                           | Biological Replicate 2 Only | 1                           |
| Q92945     | Far upstream element-binding protein 2                               | Biological 1 and 2          | 4                           |
| P14324     | Farnesyl pyrophosphate synthase                                      | Biological Replicate 2 Only | 1                           |
| Q9UKA2     | F-box/LRR-repeat protein 4                                           | Biological Replicate 2 Only | 1                           |
| Q5D862     | Filaggrin-2                                                          | Biological Replicate 2 Only | 1                           |
| Q14315     | Filamin-C                                                            | Biological Replicate 2 Only | 1                           |
| B1AJZ9     | Forkhead-associated domain-containing protein 1                      | Biological Replicate 1 Only | 1                           |
| P51114     | Fragile X mental retardation syndrome-related protein 1              | Biological Replicate 2 Only | 1                           |
| Q9H461     | Frizzled-8                                                           | Biological Replicate 2 Only | 1                           |
| P04075     | Fructose-bisphosphate aldolase A                                     | Biological Replicate 2 Only | 1                           |
| O75496     | Geminin                                                              | Biological Replicate 2 Only | 1                           |
| P18074     | General transcription and DNA repair factor IIH helicase subunit XPD | Biological Replicate 1 Only | 1                           |
| O60763     | General vesicular transport factor p115                              | Biological Replicate 1 Only | 1                           |
| P14314     | Glucosidase 2 subunit beta                                           | Biological 1 and 2          | 5                           |

| Uniprot ID | Protein Name                                                   | Biological Replicate        | Number of Modified Peptides |
|------------|----------------------------------------------------------------|-----------------------------|-----------------------------|
| P07203     | Glutathione peroxidase 1                                       | Biological Replicate 1 Only | 2                           |
| P21266     | Glutathione S-transferase Mu 3                                 | Biological Replicate 1 Only | 1                           |
| P09211     | Glutathione S-transferase P                                    | Biological Replicate 1 Only | 1                           |
| P04406     | Glyceraldehyde-3-phosphate dehydrogenase                       | Biological 1 and 2          | 2                           |
| P46976     | Glycogenin-1                                                   | Biological Replicate 2 Only | 1                           |
| Q13956     | GMP-PDE gamma                                                  | Biological Replicate 1 Only | 1                           |
| O00461     | Golgi integral membrane protein 4                              | Biological Replicate 1 Only | 1                           |
| Q08378     | Golgin subfamily A member 3                                    | Biological Replicate 1 Only | 1                           |
| Q13439     | Golgin subfamily A member 4                                    | Biological Replicate 1 Only | 1                           |
| Q14789     | Golgin subfamily B member 1                                    | Biological Replicate 1 Only | 1                           |
| Q6Y7W6     | GRB10-interacting GYF protein 2                                | Biological Replicate 1 Only | 1                           |
| Q9HAV7     | GrpE protein homolog 1, mitochondrial                          | Biological Replicate 1 Only | 1                           |
| Q14C86     | GTPase-activating protein and VPS9 domain-containing protein 1 | Biological Replicate 2 Only | 1                           |
| Q8TBN0     | Guanine nucleotide exchange factor for Rab-3A                  | Biological Replicate 2 Only | 1                           |
| P0DMV9     | Heat shock 70 kDa protein 1B                                   | Biological Replicate 2 Only | 3                           |
| P0DMV9     | Heat shock 70 kDa protein 1B                                   | Biological 1 and 2          | 5                           |
| P34931     | Heat shock 70 kDa protein 1-like                               | Biological 1 and 2          | 7                           |
| P34932     | Heat shock 70 kDa protein 4                                    | Biological 1 and 2          | 3                           |
| P17066     | Heat shock 70 kDa protein 6                                    | Biological Replicate 2 Only | 3                           |
| P11142     | Heat shock cognate 71 kDa protein                              | Biological 1 and 2          | 4                           |
| P11142     | Heat shock cognate 71 kDa protein                              | Biological 1 and 2          | 3                           |
| O75506     | Heat shock factor-binding protein 1                            | Biological Replicate 1 Only | 1                           |
| P07900     | Heat shock protein HSP 90-alpha                                | Biological Replicate 2 Only | 4                           |
| P07900     | Heat shock protein HSP 90-alpha                                | Biological Replicate 2 Only | 4                           |
| P08238     | Heat shock protein HSP 90-beta                                 | Biological 1 and 2          | 3                           |
| P08238     | Heat shock protein HSP 90-beta                                 | Biological Replicate 2 Only | 1                           |
| P54652     | Heat shock-related 70 kDa protein 2                            | Biological Replicate 2 Only | 1                           |
| P54652     | Heat shock-related 70 kDa protein 2                            | Biological 1 and 2          | 2                           |
| P09601     | Heme oxygenase 1                                               | Biological Replicate 1 Only | 1                           |
| P51858     | Hepatoma-derived growth factor                                 | Biological 1 and 2          | 4                           |
| Q99729     | Heterogeneous nuclear ribonucleoprotein A/B                    | Biological Replicate 1 Only | 1                           |

| Uniprot ID | Protein Name                                                       | Biological Replicate        | Number of Modified Peptides |
|------------|--------------------------------------------------------------------|-----------------------------|-----------------------------|
| P09651     | Heterogeneous nuclear ribonucleoprotein A1                         | Biological Replicate 1 Only | 1                           |
| P51991     | Heterogeneous nuclear ribonucleoprotein A3                         | Biological Replicate 1 Only | 1                           |
| Q14103     | Heterogeneous nuclear ribonucleoprotein D0                         | Biological Replicate 2 Only | 1                           |
| P31943     | Heterogeneous nuclear ribonucleoprotein H                          | Biological Replicate 2 Only | 1                           |
| P55795     | Heterogeneous nuclear ribonucleoprotein H2                         | Biological Replicate 2 Only | 1                           |
| P31942     | Heterogeneous nuclear ribonucleoprotein H3                         | Biological Replicate 1 Only | 1                           |
| P60709     | Heterogeneous nuclear ribonucleoprotein K                          | Biological 1 and 2          | 5                           |
| P52272     | Heterogeneous nuclear ribonucleoprotein M                          | Biological 1 and 2          | 5                           |
| Q00839     | Heterogeneous nuclear ribonucleoprotein U                          | Biological Replicate 1 Only | 1                           |
| P22626     | Heterogeneous nuclear ribonucleoproteins A2/B1                     | Biological Replicate 1 Only | 1                           |
| P07910     | Heterogeneous nuclear ribonucleoproteins C1/C2                     | Biological Replicate 1 Only | 2                           |
| P52789     | Hexokinase-2                                                       | Biological Replicate 1 Only | 1                           |
| P82970     | High mobility group nucleosome-binding domain-containing protein 5 | Biological Replicate 1 Only | 1                           |
| P09429     | High mobility group protein B1                                     | Biological Replicate 1 Only | 1                           |
| P09429     | High mobility group protein B1                                     | Biological Replicate 1 Only | 1                           |
| P26583     | High mobility group protein B2                                     | Biological 1 and 2          | 3                           |
| P17096     | High mobility group protein HMG-I/HMG-Y                            | Biological Replicate 1 Only | 1                           |
| Q92993     | Histone acetyltransferase KAT5                                     | Biological Replicate 1 Only | 1                           |
| O00422     | Histone deacetylase complex subunit SAP18                          | Biological 1 and 2          | 3                           |
| Q02539     | Histone H1.1                                                       | Biological Replicate 1 Only | 1                           |
| P16403     | Histone H1.2                                                       | Biological Replicate 1 Only | 3                           |
| P16402     | Histone H1.3                                                       | Biological Replicate 1 Only | 3                           |
| P10412     | Histone H1.4                                                       | Biological Replicate 1 Only | 3                           |
| P22492     | Histone H1t                                                        | Biological Replicate 1 Only | 1                           |
| Q92522     | Histone H1x                                                        | Biological Replicate 1 Only | 1                           |
| P0C0S8     | Histone H2A type 1                                                 | Biological 1 and 2          | 2                           |
| Q96QV6     | Histone H2A type 1-A                                               | Biological 1 and 2          | 2                           |
| P04908     | Histone H2A type 1-B/E                                             | Biological 1 and 2          | 2                           |
| Q93077     | Histone H2A type 1-C                                               | Biological 1 and 2          | 2                           |
| P20671     | Histone H2A type 1-D                                               | Biological 1 and 2          | 2                           |
| Q96KK5     | Histone H2A type 1-H                                               | Biological 1 and 2          | 2                           |

| Uniprot ID | Protein Name                                        | Biological Replicate        | Number of Modified Peptides |
|------------|-----------------------------------------------------|-----------------------------|-----------------------------|
| Q99878     | Histone H2A type 1-J                                | Biological 1 and 2          | 2                           |
| Q6FI13     | Histone H2A type 2-A                                | Biological 1 and 2          | 3                           |
| Q16777     | Histone H2A type 2-C                                | Biological 1 and 2          | 3                           |
| Q7L7L0     | Histone H2A type 3                                  | Biological 1 and 2          | 2                           |
| Q9BTM1     | Histone H2A.J                                       | Biological 1 and 2          | 2                           |
| Q71UI9     | Histone H2A.V                                       | Biological 1 and 2          | 2                           |
| P0C0S5     | Histone H2A.Z                                       | Biological 1 and 2          | 2                           |
| P16104     | Histone H2AX                                        | Biological 1 and 2          | 2                           |
| P68431     | Histone H3.1                                        | Biological Replicate 2 Only | 1                           |
| Q16695     | Histone H3.1t                                       | Biological Replicate 2 Only | 1                           |
| Q71DI3     | Histone H3.2                                        | Biological Replicate 2 Only | 1                           |
| P84243     | Histone H3.3                                        | Biological Replicate 2 Only | 1                           |
| Q6NXT2     | Histone H3.3C                                       | Biological Replicate 2 Only | 1                           |
| P62805     | Histone H4                                          | Biological Replicate 1 Only | 1                           |
| Q16576     | Histone-binding protein RBBP7                       | Biological Replicate 1 Only | 1                           |
| O43719     | HIV Tat-specific factor 1                           | Biological Replicate 1 Only | 1                           |
| P50502     | Hsc70-interacting protein                           | Biological Replicate 2 Only | 1                           |
| Q9NX55     | Huntingtin-interacting protein K                    | Biological Replicate 2 Only | 1                           |
| P00492     | Hypoxanthine-guanine phosphoribosyltransferase      | Biological Replicate 2 Only | 1                           |
| P52292     | Importin subunit alpha-1                            | Biological Replicate 1 Only | 1                           |
| Q14974     | Importin subunit beta-1                             | Biological Replicate 2 Only | 3                           |
| O00410     | Importin-5                                          | Biological Replicate 1 Only | 1                           |
| Q8NBJ7     | Inactive C-alpha-formylglycine-generating enzyme 2  | Biological Replicate 2 Only | 1                           |
| Q8N3Z0     | Inactive serine protease 35                         | Biological Replicate 2 Only | 1                           |
| Q9NZI8     | Insulin-like growth factor 2 mRNA-binding protein 1 | Biological Replicate 1 Only | 1                           |
| Q9Y6M1     | Insulin-like growth factor 2 mRNA-binding protein 2 | Biological Replicate 1 Only | 1                           |
| O00425     | Insulin-like growth factor 2 mRNA-binding protein 3 | Biological Replicate 1 Only | 1                           |
| P05556     | Integrin beta-1                                     | Biological Replicate 1 Only | 1                           |
| Q12906     | Interleukin enhancer-binding factor 3               | Biological Replicate 2 Only | 1                           |
| P01583     | Interleukin-1 alpha                                 | Biological Replicate 1 Only | 1                           |
| Q9NZM3     | Intersectin-2                                       | Biological 1 and 2          | 2                           |

| Uniprot ID | Protein Name                                                | Biological Replicate        | Number of Modified Peptides |
|------------|-------------------------------------------------------------|-----------------------------|-----------------------------|
| P50213     | Isocitrate dehydrogenase [NAD] subunit alpha, mitochondrial | Biological Replicate 1 Only | 1                           |
| P14923     | Junction plakoglobin                                        | Biological Replicate 2 Only | 2                           |
| Q9H910     | Jupiter microtubule associated homolog 2                    | Biological 1 and 2          | 2                           |
| Q9BWU0     | Kanadaplin                                                  | Biological Replicate 1 Only | 1                           |
| P13645     | Keratin, type I cytoskeletal 10                             | Biological 1 and 2          | 14                          |
| P13645     | Keratin, type I cytoskeletal 10                             | Biological 1 and 2          | 3                           |
| Q99456     | Keratin, type I cytoskeletal 12                             | Biological Replicate 2 Only | 1                           |
| P13646     | Keratin, type I cytoskeletal 13                             | Biological Replicate 2 Only | 1                           |
| P02533     | Keratin, type I cytoskeletal 14                             | Biological 1 and 2          | 8                           |
| P19012     | Keratin, type I cytoskeletal 15                             | Biological Replicate 2 Only | 1                           |
| P08779     | Keratin, type I cytoskeletal 16                             | Biological 1 and 2          | 3                           |
| P08779     | Keratin, type I cytoskeletal 16                             | Biological Replicate 2 Only | 1                           |
| Q04695     | Keratin, type I cytoskeletal 17                             | Biological Replicate 2 Only | 2                           |
| P08727     | Keratin, type I cytoskeletal 19                             | Biological 1 and 2          | 3                           |
| Q2M2I5     | Keratin, type I cytoskeletal 24                             | Biological Replicate 2 Only | 1                           |
| Q7Z3Z0     | Keratin, type I cytoskeletal 25                             | Biological 1 and 2          | 2                           |
| Q7Z3Y9     | Keratin, type I cytoskeletal 26                             | Biological 1 and 2          | 2                           |
| Q7Z3Y8     | Keratin, type I cytoskeletal 27                             | Biological 1 and 2          | 2                           |
| Q7Z3Y7     | Keratin, type I cytoskeletal 28                             | Biological 1 and 2          | 2                           |
| P35527     | Keratin, type I cytoskeletal 9                              | Biological Replicate 2 Only | 12                          |
| P35527     | Keratin, type I cytoskeletal 9                              | Biological 1 and 2          | 14                          |
| Q9NSB2     | Keratin, type II cuticular Hb4                              | Biological Replicate 1 Only | 1                           |
| P04264     | Keratin, type II cytoskeletal 1                             | Biological 1 and 2          | 10                          |
| P04264     | Keratin, type II cytoskeletal 1                             | Biological 1 and 2          | 2                           |
| Q7Z794     | Keratin, type II cytoskeletal 1b                            | Biological 1 and 2          | 2                           |
| P35908     | Keratin, type II cytoskeletal 2 epidermal                   | Biological 1 and 2          | 3                           |
| P35908     | Keratin, type II cytoskeletal 2 epidermal                   | Biological Replicate 2 Only | 13                          |
| Q01546     | Keratin, type II cytoskeletal 2 oral                        | Biological Replicate 2 Only | 2                           |
| P12035     | Keratin, type II cytoskeletal 3                             | Biological Replicate 2 Only | 1                           |
| P19013     | Keratin, type II cytoskeletal 4                             | Biological Replicate 2 Only | 1                           |
| P19013     | Keratin, type II cytoskeletal 4                             | Biological Replicate 2 Only | 1                           |

| Uniprot ID | Protein Name                                                             | Biological Replicate        | Number of Modified Peptides |
|------------|--------------------------------------------------------------------------|-----------------------------|-----------------------------|
| P13647     | Keratin, type II cytoskeletal 5                                          | Biological Replicate 2 Only | 6                           |
| P13647     | Keratin, type II cytoskeletal 5                                          | Biological 1 and 2          | 8                           |
| P02538     | Keratin, type II cytoskeletal 6A                                         | Biological 1 and 2          | 3                           |
| P04259     | Keratin, type II cytoskeletal 6B                                         | Biological Replicate 2 Only | 1                           |
| P04259     | Keratin, type II cytoskeletal 6B                                         | Biological 1 and 2          | 2                           |
| P48668     | Keratin, type II cytoskeletal 6C                                         | Biological 1 and 2          | 3                           |
| P08729     | Keratin, type II cytoskeletal 7                                          | Biological Replicate 1 Only | 1                           |
| Q14CN4     | Keratin, type II cytoskeletal 72                                         | Biological Replicate 2 Only | 1                           |
| O95678     | Keratin, type II cytoskeletal 75                                         | Biological Replicate 2 Only | 1                           |
| Q5XKE5     | Keratin, type II cytoskeletal 79                                         | Biological Replicate 2 Only | 1                           |
| P05787     | Keratin, type II cytoskeletal 8                                          | Biological Replicate 1 Only | 1                           |
| P05787     | Keratin, type II cytoskeletal 8                                          | Biological Replicate 1 Only | 2                           |
| Q86UP2     | Kinectin                                                                 | Biological Replicate 1 Only | 2                           |
| Q07866     | Kinesin light chain 1                                                    | Biological Replicate 1 Only | 1                           |
| Q14807     | Kinesin-like protein KIF22                                               | Biological Replicate 1 Only | 1                           |
| Q9H410     | Kinetochores-associated protein DSN1 homolog                             | Biological Replicate 1 Only | 1                           |
| Q04760     | Lactoylglutathione lyase                                                 | Biological 1 and 2          | 2                           |
| P20700     | Lamin-B1                                                                 | Biological Replicate 1 Only | 3                           |
| Q03252     | Lamin-B2                                                                 | Biological 1 and 2          | 4                           |
| Q16363     | Laminin subunit alpha-4                                                  | Biological Replicate 1 Only | 1                           |
| P11047     | Laminin subunit gamma-1                                                  | Biological Replicate 1 Only | 1                           |
| Q96KR4     | Leishmanolysin-like peptidase                                            | Biological Replicate 1 Only | 1                           |
| Q9BTN0     | Leucine-rich repeat and fibronectin type-III domain-containing protein 3 | Biological Replicate 2 Only | 1                           |
| Q96B70     | Leukocyte receptor cluster member 9                                      | Biological Replicate 2 Only | 1                           |
| Q14114     | Low-density lipoprotein receptor-related protein 8                       | Biological Replicate 2 Only | 1                           |
| O95232     | Luc7-like protein 3                                                      | Biological Replicate 2 Only | 1                           |
| P05455     | Lupus La protein                                                         | Biological Replicate 1 Only | 2                           |
| P40926     | Malate dehydrogenase, mitochondrial                                      | Biological Replicate 1 Only | 1                           |
| Q8IWC1     | MAP7 domain-containing protein 3                                         | Biological Replicate 1 Only | 1                           |
| P30153     | Medium tumor antigen-associated 61 kDa protein                           | Biological Replicate 1 Only | 1                           |
| O00264     | Membrane-associated progesterone receptor component 1                    | Biological Replicate 1 Only | 1                           |

| Uniprot ID | Protein Name                                                  | Biological Replicate        | Number of Modified Peptides |
|------------|---------------------------------------------------------------|-----------------------------|-----------------------------|
| P54105     | Methylosome subunit pICln                                     | Biological Replicate 2 Only | 2                           |
| P46821     | Microtubule-associated protein 1B                             | Biological Replicate 1 Only | 1                           |
| P27816     | Microtubule-associated protein 4                              | Biological 1 and 2          | 6                           |
| Q9NU22     | Midasin                                                       | Biological Replicate 2 Only | 1                           |
| Q8TCT9     | Minor histocompatibility antigen H13                          | Biological Replicate 1 Only | 1                           |
| P62072     | Mitochondrial import inner membrane translocase subunit Tim10 | Biological Replicate 1 Only | 1                           |
| Q9Y5L4     | Mitochondrial import inner membrane translocase subunit Tim13 | Biological Replicate 1 Only | 1                           |
| Q9NS69     | Mitochondrial import receptor subunit TOM22 homolog           | Biological Replicate 1 Only | 1                           |
| O95202     | Mitochondrial proton/calcium exchanger protein                | Biological 1 and 2          | 3                           |
| Q9Y3A3     | MOB-like protein phocein                                      | Biological Replicate 2 Only | 1                           |
| Q9Y605     | MORF4 family-associated protein 1                             | Biological Replicate 2 Only | 1                           |
| P22234     | Multifunctional protein ADE2                                  | Biological Replicate 2 Only | 1                           |
| Q6DN12     | Multiple C2 and transmembrane domain-containing protein 2     | Biological Replicate 2 Only | 1                           |
| P05976     | Myosin light chain 1/3, skeletal muscle isoform               | Biological 1 and 2          | 2                           |
| P08590     | Myosin light chain 3                                          | Biological 1 and 2          | 2                           |
| P14649     | Myosin light chain 6B                                         | Biological Replicate 2 Only | 1                           |
| P60660     | Myosin light polypeptide 6                                    | Biological 1 and 2          | 5                           |
| P19105     | Myosin regulatory light chain 12A                             | Biological Replicate 2 Only | 2                           |
| O14950     | Myosin regulatory light chain 12B                             | Biological Replicate 2 Only | 2                           |
| P24844     | Myosin regulatory light polypeptide 9                         | Biological Replicate 2 Only | 3                           |
| P35579     | Myosin-9                                                      | Biological 1 and 2          | 5                           |
| P29966     | Myristoylated alanine-rich C-kinase substrate                 | Biological 1 and 2          | 3                           |
| Q86W28     | NACHT, LRR and PYD domains-containing protein 8               | Biological Replicate 2 Only | 1                           |
| P17568     | NADH dehydrogenase                                            | Biological Replicate 2 Only | 1                           |
| Q16718     | NADH dehydrogenase [ubiquinone] 1 alpha subcomplex subunit 5  | Biological Replicate 1 Only | 1                           |
| Q8NF91     | Nesprin-1                                                     | Biological 1 and 2          | 2                           |
| P48681     | Nestin                                                        | Biological Replicate 1 Only | 1                           |
| Q9UMX5     | Neudesin                                                      | Biological Replicate 1 Only | 1                           |
| Q09666     | Neuroblast differentiation-associated protein AHNAK           | Biological Replicate 2 Only | 1                           |
| P07196     | Neurofilament light polypeptide                               | Biological Replicate 1 Only | 2                           |
| P07197     | Neurofilament medium polypeptide                              | Biological 1 and 2          | 2                           |

| Uniprot ID | Protein Name                                      | Biological Replicate        | Number of Modified Peptides |
|------------|---------------------------------------------------|-----------------------------|-----------------------------|
| Q9Y639     | Neuroplastin                                      | Biological 1 and 2          | 3                           |
| Q9Y6K9     | NF-kappa-B essential modulator                    | Biological Replicate 1 Only | 1                           |
| Q9Y2I6     | Ninein-like protein                               | Biological Replicate 2 Only | 1                           |
| Q9NZG7     | Ninjurin-2                                        | Biological Replicate 2 Only | 1                           |
| Q15233     | Non-POU domain-containing octamer-binding protein | Biological 1 and 2          | 7                           |
| P22307     | Non-specific lipid-transfer protein               | Biological Replicate 1 Only | 2                           |
| P23497     | Nuclear autoantigen Sp-100                        | Biological Replicate 1 Only | 1                           |
| P49321     | Nuclear autoantigenic sperm protein               | Biological 1 and 2          | 5                           |
| Q09161     | Nuclear cap-binding protein subunit 1             | Biological Replicate 2 Only | 1                           |
| Q53F19     | Nuclear cap-binding protein subunit 3             | Biological Replicate 1 Only | 2                           |
| Q14980     | Nuclear mitotic apparatus protein 1               | Biological Replicate 1 Only | 2                           |
| P49790     | Nuclear pore complex protein Nup153               | Biological Replicate 1 Only | 2                           |
| P67809     | Nuclease-sensitive element-binding protein 1      | Biological Replicate 1 Only | 1                           |
| P67809     | Nuclease-sensitive element-binding protein 1      | Biological 1 and 2          | 4                           |
| Q02818     | Nucleobindin-1                                    | Biological Replicate 1 Only | 1                           |
| P80303     | Nucleobindin-2                                    | Biological 1 and 2          | 2                           |
| Q13823     | Nucleolar GTP-binding protein 2                   | Biological Replicate 2 Only | 1                           |
| Q9Y3C1     | Nucleolar protein 16                              | Biological Replicate 1 Only | 2                           |
| Q9Y2X3     | Nucleolar protein 58                              | Biological Replicate 1 Only | 1                           |
| Q9NR30     | Nucleolar RNA helicase 2                          | Biological Replicate 1 Only | 1                           |
| P19338     | Nucleolin                                         | Biological Replicate 1 Only | 3                           |
| P06748     | Nucleophosmin                                     | Biological 1 and 2          | 7                           |
| P12270     | Nucleoprotein TPR                                 | Biological Replicate 1 Only | 4                           |
| P15531     | Nucleoside diphosphate kinase A                   | Biological Replicate 1 Only | 2                           |
| P22392     | Nucleoside diphosphate kinase B                   | Biological Replicate 1 Only | 1                           |
| Q9NX40     | OCIA domain-containing protein 1                  | Biological Replicate 1 Only | 1                           |
| P47893     | Olfactory receptor 3A2                            | Biological Replicate 2 Only | 1                           |
| Q96CV9     | Optineurin                                        | Biological Replicate 1 Only | 1                           |
| Q8TE49     | OTU domain-containing protein 7A                  | Biological Replicate 2 Only | 1                           |
| Q8WXF1     | Paraspeckle component 1                           | Biological Replicate 1 Only | 2                           |
| Q9BRP8     | Partner of Y14 and mago                           | Biological Replicate 1 Only | 1                           |



| Uniprot ID | Protein Name                                              | Biological Replicate        | Number of Modified Peptides |
|------------|-----------------------------------------------------------|-----------------------------|-----------------------------|
| Q6ZV29     | Patatin-like phospholipase domain-containing protein 7    | Biological Replicate 1 Only | 1                           |
| O75475     | PC4 and SFRS1-interacting protein                         | Biological Replicate 1 Only | 1                           |
| O00151     | PDZ and LIM domain protein 1                              | Biological Replicate 1 Only | 1                           |
| Q76G19     | PDZ domain-containing protein 4                           | Biological Replicate 2 Only | 1                           |
| P62937     | Peptidyl-prolyl cis-trans isomerase A                     | Biological Replicate 1 Only | 1                           |
| P62937     | Peptidyl-prolyl cis-trans isomerase A                     | Biological 1 and 2          | 2                           |
| Q9Y536     | Peptidyl-prolyl cis-trans isomerase A-like 4A             | Biological Replicate 1 Only | 1                           |
| A0A0B4J2A2 | Peptidyl-prolyl cis-trans isomerase A-like 4C             | Biological Replicate 1 Only | 1                           |
| F5H284     | Peptidyl-prolyl cis-trans isomerase A-like 4D             | Biological Replicate 1 Only | 1                           |
| P0DN26     | Peptidyl-prolyl cis-trans isomerase A-like 4F             | Biological Replicate 1 Only | 1                           |
| P0DN37     | Peptidyl-prolyl cis-trans isomerase A-like 4G             | Biological Replicate 1 Only | 1                           |
| A0A075B767 | Peptidyl-prolyl cis-trans isomerase A-like 4H             | Biological Replicate 1 Only | 1                           |
| Q96AY3     | Peptidyl-prolyl cis-trans isomerase FKBP10                | Biological Replicate 2 Only | 1                           |
| Q02790     | Peptidyl-prolyl cis-trans isomerase FKBP4                 | Biological Replicate 1 Only | 1                           |
| Q13451     | Peptidyl-prolyl cis-trans isomerase FKBP5                 | Biological Replicate 1 Only | 1                           |
| Q13526     | Peptidyl-prolyl cis-trans isomerase NIMA-interacting 1    | Biological Replicate 2 Only | 1                           |
| Q9Y237     | Peptidyl-prolyl cis-trans isomerase NIMA-interacting 4    | Biological Replicate 1 Only | 1                           |
| Q9Y3C6     | Peptidyl-prolyl cis-trans isomerase-like 1                | Biological Replicate 1 Only | 1                           |
| P41219     | Peripherin                                                | Biological Replicate 1 Only | 3                           |
| Q06830     | Peroxiredoxin-1                                           | Biological Replicate 1 Only | 1                           |
| P40855     | Peroxisomal biogenesis factor 19                          | Biological 1 and 2          | 3                           |
| P51659     | Peroxisomal multifunctional enzyme type 2                 | Biological Replicate 1 Only | 1                           |
| Q9Y285     | Phenylalanine--tRNA ligase alpha subunit                  | Biological Replicate 2 Only | 1                           |
| Q9UG56     | Phosphatidylserine decarboxylase proenzyme, mitochondrial | Biological Replicate 2 Only | 1                           |
| P18669     | Phosphoglycerate mutase 1                                 | Biological Replicate 1 Only | 1                           |
| Q9H307     | Pinin                                                     | Biological Replicate 1 Only | 1                           |
| Q8NC51     | Plasminogen activator inhibitor 1 RNA-binding protein     | Biological Replicate 1 Only | 1                           |
| P13796     | Plastin-2                                                 | Biological Replicate 1 Only | 2                           |
| P13797     | Plastin-3                                                 | Biological Replicate 1 Only | 1                           |
| P13797     | Plastin-3                                                 | Biological 1 and 2          | 5                           |
| Q9Y5J5     | Pleckstrin homology-like domain family A member 3         | Biological Replicate 2 Only | 1                           |

| Uniprot ID | Protein Name                                   | Biological Replicate        | Number of Modified Peptides |
|------------|------------------------------------------------|-----------------------------|-----------------------------|
| Q8IUUK5    | Plexin domain-containing protein 1             | Biological Replicate 2 Only | 1                           |
| P09874     | Poly [ADP-ribose] polymerase 1                 | Biological Replicate 1 Only | 1                           |
| Q15365     | Poly(rC)-binding protein 1                     | Biological Replicate 1 Only | 1                           |
| Q15366     | Poly(rC)-binding protein 2                     | Biological Replicate 2 Only | 1                           |
| P11940     | Polyadenylate-binding protein 1                | Biological Replicate 1 Only | 2                           |
| P11940     | Polyadenylate-binding protein 1                | Biological 1 and 2          | 2                           |
| Q9H361     | Polyadenylate-binding protein 3                | Biological Replicate 1 Only | 1                           |
| Q13310     | Polyadenylate-binding protein 4                | Biological Replicate 1 Only | 1                           |
| O60828     | Polyglutamine-binding protein 1                | Biological 1 and 2          | 2                           |
| P0CG47     | Polyubiquitin-B                                | Biological Replicate 2 Only | 1                           |
| P0CG47     | Polyubiquitin-B                                | Biological 1 and 2          | 2                           |
| P0CG48     | Polyubiquitin-C                                | Biological 1 and 2          | 3                           |
| Q6S8J7     | POTE ankyrin domain family member A            | Biological Replicate 1 Only | 1                           |
| Q6S8J3     | POTE ankyrin domain family member E            | Biological 1 and 2          | 5                           |
| A5A3E0     | POTE ankyrin domain family member F            | Biological 1 and 2          | 5                           |
| P0CG38     | POTE ankyrin domain family member I            | Biological 1 and 2          | 4                           |
| P0CG39     | POTE ankyrin domain family member J            | Biological 1 and 2          | 4                           |
| Q9UHV9     | Prefoldin subunit 2                            | Biological 1 and 2          | 2                           |
| P61758     | Prefoldin subunit 3                            | Biological Replicate 1 Only | 1                           |
| Q92841     | Probable ATP-dependent RNA helicase DDX17      | Biological Replicate 1 Only | 1                           |
| Q92841     | Probable ATP-dependent RNA helicase DDX17      | Biological Replicate 2 Only | 1                           |
| P17844     | Probable ATP-dependent RNA helicase DDX5       | Biological Replicate 2 Only | 1                           |
| P26196     | Probable ATP-dependent RNA helicase DDX6       | Biological Replicate 1 Only | 1                           |
| Q9H5Z1     | Probable ATP-dependent RNA helicase DHX35      | Biological Replicate 2 Only | 1                           |
| P28370     | Probable global transcription activator SNF2L1 | Biological Replicate 2 Only | 1                           |
| Q13395     | Probable methyltransferase TARBP1              | Biological Replicate 1 Only | 1                           |
| Q8N0Y7     | Probable phosphoglycerate mutase 4             | Biological Replicate 1 Only | 1                           |
| Q99848     | Probable rRNA-processing protein EBP2          | Biological Replicate 2 Only | 1                           |
| Q8WUM4     | Programmed cell death 6-interacting protein    | Biological Replicate 1 Only | 1                           |
| O75340     | Programmed cell death protein 6                | Biological Replicate 1 Only | 1                           |
| Q9UQ80     | Proliferation-associated protein 2G4           | Biological Replicate 2 Only | 1                           |

| Uniprot ID | Protein Name                                    | Biological Replicate        | Number of Modified Peptides |
|------------|-------------------------------------------------|-----------------------------|-----------------------------|
| Q92733     | Proline-rich protein PRCC                       | Biological Replicate 2 Only | 1                           |
| P07602     | Prosaposin                                      | Biological Replicate 1 Only | 1                           |
| Q15185     | Prostaglandin E synthase 3                      | Biological Replicate 2 Only | 1                           |
| P28066     | Proteasome subunit alpha type-5                 | Biological 1 and 2          | 2                           |
| Q9NY61     | Protein AATF                                    | Biological Replicate 1 Only | 1                           |
| P02760     | Protein AMBP                                    | Biological Replicate 2 Only | 1                           |
| Q9Y2V0     | Protein C15orf41                                | Biological Replicate 1 Only | 1                           |
| Q96C57     | Protein CUSTOS                                  | Biological Replicate 1 Only | 1                           |
| O60888     | Protein CutA                                    | Biological Replicate 2 Only | 1                           |
| P35659     | Protein DEK                                     | Biological 1 and 2          | 2                           |
| P07237     | Protein disulfide-isomerase                     | Biological 1 and 2          | 2                           |
| P30101     | Protein disulfide-isomerase A3                  | Biological Replicate 1 Only | 3                           |
| P13667     | Protein disulfide-isomerase A4                  | Biological Replicate 1 Only | 2                           |
| Q15084     | Protein disulfide-isomerase A6                  | Biological Replicate 1 Only | 1                           |
| P49257     | Protein ERGIC-53                                | Biological Replicate 2 Only | 1                           |
| Q7Z309     | Protein FAM122B                                 | Biological Replicate 1 Only | 1                           |
| Q96C01     | Protein FAM136A                                 | Biological Replicate 1 Only | 1                           |
| Q8NCA5     | Protein FAM98A                                  | Biological Replicate 2 Only | 1                           |
| Q52LJ0     | Protein FAM98B                                  | Biological Replicate 2 Only | 1                           |
| O94992     | Protein HEXIM1                                  | Biological Replicate 1 Only | 1                           |
| A5PL33     | Protein KRBA1                                   | Biological Replicate 2 Only | 1                           |
| Q96GY3     | Protein lin-37 homolog                          | Biological Replicate 1 Only | 1                           |
| Q8WZA0     | Protein LZIC                                    | Biological Replicate 1 Only | 1                           |
| Q92597     | Protein NDRG1                                   | Biological Replicate 1 Only | 1                           |
| O15355     | Protein phosphatase 1G                          | Biological 1 and 2          | 2                           |
| P41236     | Protein phosphatase inhibitor 2                 | Biological Replicate 1 Only | 1                           |
| Q6NXS1     | Protein phosphatase inhibitor 2 family member B | Biological Replicate 1 Only | 1                           |
| Q5THK1     | Protein PRR14L                                  | Biological Replicate 2 Only | 1                           |
| P48634     | Protein PRRC2A                                  | Biological Replicate 1 Only | 2                           |
| Q9Y520     | Protein PRRC2C                                  | Biological Replicate 1 Only | 2                           |
| Q3SYG4     | Protein PTHB1                                   | Biological Replicate 2 Only | 1                           |

| Uniprot ID | Protein Name                                     | Biological Replicate        | Number of Modified Peptides |
|------------|--------------------------------------------------|-----------------------------|-----------------------------|
| P06702     | Protein S100-A9                                  | Biological Replicate 2 Only | 2                           |
| Q01105     | Protein SET                                      | Biological Replicate 2 Only | 1                           |
| Q9Y2Z0     | Protein SGT1 homolog                             | Biological Replicate 1 Only | 1                           |
| O94964     | Protein SOGA1                                    | Biological Replicate 2 Only | 1                           |
| P18583     | Protein SON                                      | Biological Replicate 1 Only | 1                           |
| Q8WWL2     | Protein spire homolog 2                          | Biological Replicate 1 Only | 1                           |
| Q92734     | Protein TFG                                      | Biological Replicate 2 Only | 1                           |
| P60468     | Protein transport protein Sec61 subunit beta     | Biological Replicate 1 Only | 1                           |
| Q99497     | Protein/nucleic acid deglycase DJ-1              | Biological Replicate 2 Only | 1                           |
| P06454     | Prothymosin alpha                                | Biological 1 and 2          | 2                           |
| Q5JNZ5     | Putative 40S ribosomal protein S26-like 1        | Biological 1 and 2          | 2                           |
| Q9BYX7     | Putative beta-actin-like protein 3               | Biological 1 and 2          | 4                           |
| Q5VTE0     | Putative elongation factor 1-alpha-like 3        | Biological Replicate 2 Only | 1                           |
| P48741     | Putative heat shock 70 kDa protein 7             | Biological Replicate 2 Only | 3                           |
| Q58FG0     | Putative heat shock protein HSP 90-alpha A5      | Biological Replicate 2 Only | 1                           |
| Q58FF8     | Putative heat shock protein HSP 90-beta 2        | Biological Replicate 2 Only | 1                           |
| Q58FF6     | Putative heat shock protein HSP 90-beta 4        | Biological Replicate 2 Only | 1                           |
| Q58FF7     | Putative heat shock protein HSP 90-beta-3        | Biological Replicate 2 Only | 2                           |
| B2RPK0     | Putative high mobility group protein B1-like 1   | Biological Replicate 1 Only | 1                           |
| O60361     | Putative nucleoside diphosphate kinase           | Biological Replicate 1 Only | 1                           |
| Q96C36     | Pyrroline-5-carboxylate reductase 2              | Biological Replicate 1 Only | 1                           |
| P11177     | Pyruvate dehydrogenase E1 component subunit beta | Biological Replicate 1 Only | 1                           |
| Q14699     | Raftlin                                          | Biological Replicate 1 Only | 1                           |
| Q6IAA8     | Ragulator complex protein LAMTOR1                | Biological Replicate 1 Only | 1                           |
| P46060     | Ran GTPase-activating protein 1                  | Biological Replicate 1 Only | 1                           |
| Q9H6Z4     | Ran-binding protein 3                            | Biological Replicate 2 Only | 1                           |
| Q13283     | Ras GTPase-activating protein-binding protein 1  | Biological Replicate 1 Only | 1                           |
| Q9UN86     | Ras GTPase-activating protein-binding protein 2  | Biological Replicate 1 Only | 1                           |
| P46940     | Ras GTPase-activating-like protein IQGAP1        | Biological Replicate 2 Only | 1                           |
| Q9H0U4     | Ras-related protein Rab-1B                       | Biological 1 and 2          | 2                           |
| P23468     | Receptor-type tyrosine-protein phosphatase delta | Biological Replicate 2 Only | 1                           |

| Uniprot ID | Protein Name                                                | Biological Replicate        | Number of Modified Peptides |
|------------|-------------------------------------------------------------|-----------------------------|-----------------------------|
| P23471     | Receptor-type tyrosine-protein phosphatase zeta             | Biological Replicate 2 Only | 1                           |
| P18754     | Regulator of chromosome condensation                        | Biological Replicate 2 Only | 1                           |
| Q9UKL0     | REST corepressor 1                                          | Biological Replicate 1 Only | 1                           |
| Q15293     | Reticulocalbin-1                                            | Biological Replicate 2 Only | 1                           |
| Q9NQC3     | Reticulon-4                                                 | Biological Replicate 2 Only | 1                           |
| P52565     | Rho GDP-dissociation inhibitor 1                            | Biological 1 and 2          | 2                           |
| Q92974     | Rho guanine nucleotide exchange factor 2                    | Biological Replicate 1 Only | 1                           |
| Q6NTF9     | Rhomboid domain-containing protein 2                        | Biological Replicate 2 Only | 1                           |
| Q96E11     | Ribosome-recycling factor, mitochondrial                    | Biological Replicate 1 Only | 1                           |
| Q96E39     | RNA binding motif protein, X-linked-like-1                  | Biological Replicate 1 Only | 1                           |
| Q9Y224     | RNA transcription, translation and transport factor protein | Biological Replicate 1 Only | 1                           |
| P37802     | RNA-binding motif protein, X chromosome                     | Biological Replicate 1 Only | 1                           |
| O75526     | RNA-binding motif protein, X-linked-like-2                  | Biological Replicate 1 Only | 1                           |
| P98179     | RNA-binding protein 3                                       | Biological Replicate 1 Only | 2                           |
| Q01844     | RNA-binding protein EWS                                     | Biological Replicate 1 Only | 3                           |
| P35637     | RNA-binding protein FUS                                     | Biological 1 and 2          | 4                           |
| Q8WZ75     | Roundabout homolog 4                                        | Biological Replicate 2 Only | 1                           |
| Q9Y265     | RuvB-like 1                                                 | Biological Replicate 2 Only | 1                           |
| Q14BN4     | Sarcolemmal membrane-associated protein                     | Biological Replicate 2 Only | 1                           |
| P16615     | Sarcoplasmic/endoplasmic reticulum calcium ATPase 2         | Biological Replicate 2 Only | 1                           |
| Q15424     | Scaffold attachment factor B1                               | Biological Replicate 2 Only | 1                           |
| Q9UQ35     | Serine/arginine repetitive matrix protein 2                 | Biological 1 and 2          | 2                           |
| Q9BYT3     | Serine/threonine-protein kinase 33                          | Biological Replicate 1 Only | 1                           |
| Q8N568     | Serine/threonine-protein kinase DCLK2                       | Biological Replicate 1 Only | 1                           |
| Q9NY27     | Serine/threonine-protein phosphatase 4 regulatory subunit 2 | Biological Replicate 1 Only | 2                           |
| P02787     | Serotransferrin                                             | Biological Replicate 1 Only | 1                           |
| P02768     | Serum albumin                                               | Biological Replicate 1 Only | 4                           |
| P11831     | Serum response factor                                       | Biological Replicate 2 Only | 1                           |
| Q9ULZ2     | Signal-transducing adaptor protein 1                        | Biological Replicate 1 Only | 1                           |
| Q04837     | Single-stranded DNA-binding protein, mitochondrial          | Biological Replicate 1 Only | 2                           |
| P12755     | Ski oncogene                                                | Biological Replicate 1 Only | 1                           |

| Uniprot ID | Protein Name                                         | Biological Replicate        | Number of Modified Peptides |
|------------|------------------------------------------------------|-----------------------------|-----------------------------|
| O00193     | Small acidic protein                                 | Biological Replicate 1 Only | 1                           |
| P61956     | Small ubiquitin-related modifier 2                   | Biological Replicate 1 Only | 1                           |
| P55854     | Small ubiquitin-related modifier 3                   | Biological Replicate 1 Only | 1                           |
| Q6EEV6     | Small ubiquitin-related modifier 4                   | Biological Replicate 1 Only | 1                           |
| A6NHR9     | SMC hinge domain-containing protein 1                | Biological Replicate 1 Only | 1                           |
| Q13573     | SNW domain-containing protein 1                      | Biological Replicate 1 Only | 2                           |
| P05023     | Sodium/potassium-transporting ATPase subunit alpha-1 | Biological Replicate 2 Only | 1                           |
| P50993     | Sodium/potassium-transporting ATPase subunit alpha-2 | Biological Replicate 2 Only | 1                           |
| P13637     | Sodium/potassium-transporting ATPase subunit alpha-3 | Biological Replicate 2 Only | 1                           |
| Q13733     | Sodium/potassium-transporting ATPase subunit alpha-4 | Biological Replicate 1 Only | 1                           |
| Q13733     | Sodium/potassium-transporting ATPase subunit alpha-4 | Biological Replicate 2 Only | 1                           |
| P54709     | Sodium/potassium-transporting ATPase subunit beta-3  | Biological Replicate 1 Only | 1                           |
| P30626     | Sorcin                                               | Biological Replicate 1 Only | 1                           |
| O60749     | Sorting nexin-2                                      | Biological 1 and 2          | 2                           |
| Q9H3U7     | SPARC-related modular calcium-binding protein 2      | Biological Replicate 2 Only | 1                           |
| Q9H6E5     | Speckle targeted PIP5K1A-regulated poly              | Biological Replicate 1 Only | 1                           |
| Q13813     | Spectrin alpha chain, non-erythrocytic 1             | Biological Replicate 1 Only | 3                           |
| Q01082     | Spectrin beta chain, non-erythrocytic 1              | Biological Replicate 2 Only | 1                           |
| Q15637     | Splicing factor 1                                    | Biological Replicate 2 Only | 1                           |
| Q15459     | Splicing factor 3A subunit 1                         | Biological Replicate 1 Only | 1                           |
| Q13435     | Splicing factor 3B subunit 2                         | Biological 1 and 2          | 8                           |
| P26368     | Splicing factor U2AF 65 kDa subunit                  | Biological Replicate 2 Only | 1                           |
| Q9BW85     | Splicing factor YJU2                                 | Biological Replicate 1 Only | 1                           |
| P23246     | Splicing factor, proline- and glutamine-rich         | Biological 1 and 2          | 3                           |
| Q07666     | Src-associated in mitosis 68 kDa protein             | Biological Replicate 2 Only | 1                           |
| P38646     | Stress-70 protein, mitochondrial                     | Biological 1 and 2          | 5                           |
| P31948     | Stress-induced-phosphoprotein 1                      | Biological 1 and 2          | 7                           |
| Q9UBE0     | SUMO-activating enzyme subunit 1                     | Biological Replicate 1 Only | 1                           |
| Q9UBS9     | SUN domain-containing ossification factor            | Biological Replicate 1 Only | 1                           |
| P00441     | Superoxide dismutase                                 | Biological Replicate 2 Only | 1                           |
| P34741     | Syndecan-2                                           | Biological 1 and 2          | 2                           |

| Uniprot ID | Protein Name                                     | Biological Replicate        | Number of Modified Peptides |
|------------|--------------------------------------------------|-----------------------------|-----------------------------|
| Q9Y490     | Talin-1                                          | Biological Replicate 2 Only | 1                           |
| Q86TI0     | TBC1 domain family member 1                      | Biological Replicate 2 Only | 1                           |
| P78371     | T-complex protein 1 subunit beta                 | Biological Replicate 2 Only | 1                           |
| P78371     | T-complex protein 1 subunit beta                 | Biological Replicate 2 Only | 1                           |
| P50991     | T-complex protein 1 subunit delta                | Biological Replicate 1 Only | 1                           |
| P49368     | T-complex protein 1 subunit gamma                | Biological Replicate 1 Only | 1                           |
| P50990     | T-complex protein 1 subunit theta                | Biological Replicate 1 Only | 2                           |
| Q9NUJ3     | T-complex protein 11-like protein 1              | Biological Replicate 1 Only | 1                           |
| Q2MV58     | Tectonic-1                                       | Biological Replicate 2 Only | 1                           |
| P22105     | Tenascin-X                                       | Biological 1 and 2          | 2                           |
| O95881     | Thioredoxin domain-containing protein 12         | Biological Replicate 1 Only | 1                           |
| O14530     | Thioredoxin domain-containing protein 9          | Biological Replicate 1 Only | 1                           |
| Q8NFAQ8    | Torsin-1A-interacting protein 2                  | Biological Replicate 1 Only | 1                           |
| P37837     | Transaldolase                                    | Biological Replicate 2 Only | 1                           |
| Q96EI5     | Transcription elongation factor A protein-like 4 | Biological Replicate 2 Only | 1                           |
| Q00059     | Transcription factor A, mitochondrial            | Biological Replicate 1 Only | 1                           |
| P05412     | Transcription factor AP-1                        | Biological Replicate 1 Only | 1                           |
| Q13263     | Transcription intermediary factor 1-beta         | Biological 1 and 2          | 3                           |
| Q8WXI9     | Transcriptional repressor p66-beta               | Biological Replicate 1 Only | 2                           |
| P37802     | Transgelin-2                                     | Biological Replicate 1 Only | 1                           |
| Q9UI15     | Transgelin-3                                     | Biological Replicate 1 Only | 1                           |
| P55072     | Transitional endoplasmic reticulum ATPase        | Biological Replicate 1 Only | 2                           |
| P29401     | Transketolase                                    | Biological Replicate 2 Only | 2                           |
| Q9HD45     | Transmembrane 9 superfamily member 3             | Biological Replicate 2 Only | 1                           |
| Q13445     | Transmembrane emp24 domain-containing protein 1  | Biological Replicate 1 Only | 1                           |
| Q13428     | Treacle protein                                  | Biological Replicate 1 Only | 1                           |
| P60174     | Triosephosphate isomerase                        | Biological Replicate 1 Only | 1                           |
| Q6P1R4     | tRNA-dihydrouridine                              | Biological Replicate 2 Only | 1                           |
| Q9Y3I0     | tRNA-splicing ligase RtcB homolog                | Biological Replicate 2 Only | 1                           |
| P09493     | Tropomyosin alpha-1 chain                        | Biological 1 and 2          | 2                           |
| P06753     | Tropomyosin alpha-3 chain                        | Biological Replicate 2 Only | 1                           |

| Uniprot ID | Protein Name                                      | Biological Replicate        | Number of Modified Peptides |
|------------|---------------------------------------------------|-----------------------------|-----------------------------|
| Q71U36     | Tubulin alpha-1A chain                            | Biological Replicate 2 Only | 1                           |
| P68363     | Tubulin alpha-1B chain                            | Biological Replicate 2 Only | 1                           |
| Q9BQE3     | Tubulin alpha-1C chain                            | Biological Replicate 2 Only | 1                           |
| P68366     | Tubulin alpha-4A chain                            | Biological Replicate 2 Only | 1                           |
| A6NNZ2     | Tubulin beta 8B                                   | Biological 1 and 2          | 2                           |
| P07437     | Tubulin beta chain                                | Biological 1 and 2          | 10                          |
| P07437     | Tubulin beta chain                                | Biological Replicate 2 Only | 2                           |
| Q9H4B7     | Tubulin beta-1 chain                              | Biological 1 and 2          | 2                           |
| Q9H4B7     | Tubulin beta-1 chain                              | Biological Replicate 2 Only | 1                           |
| Q13509     | Tubulin beta-2A chain                             | Biological 1 and 2          | 3                           |
| Q9BVA1     | Tubulin beta-2B chain                             | Biological 1 and 2          | 10                          |
| Q13509     | Tubulin beta-3 chain                              | Biological 1 and 2          | 7                           |
| P04350     | Tubulin beta-4A chain                             | Biological 1 and 2          | 4                           |
| P04350     | Tubulin beta-4A chain                             | Biological 1 and 2          | 8                           |
| P68371     | Tubulin beta-4B chain                             | Biological 1 and 2          | 12                          |
| P68371     | Tubulin beta-4B chain                             | Biological Replicate 2 Only | 1                           |
| Q9BUF5     | Tubulin beta-6 chain                              | Biological 1 and 2          | 4                           |
| Q9BUF5     | Tubulin beta-6 chain                              | Biological Replicate 1 Only | 1                           |
| Q3ZCM7     | Tubulin beta-8 chain                              | Biological 1 and 2          | 3                           |
| O75347     | Tubulin-specific chaperone A                      | Biological Replicate 2 Only | 1                           |
| B5MCY1     | Tudor domain-containing protein 15                | Biological Replicate 2 Only | 1                           |
| O43399     | Tumor protein D54                                 | Biological Replicate 2 Only | 1                           |
| O14683     | Tumor protein p53-inducible protein 11            | Biological Replicate 2 Only | 1                           |
| Q12792     | Twinfilin-1                                       | Biological Replicate 2 Only | 1                           |
| P08621     | U1 small nuclear ribonucleoprotein 70 kDa         | Biological Replicate 2 Only | 2                           |
| P09012     | U1 small nuclear ribonucleoprotein A              | Biological 1 and 2          | 2                           |
| P09234     | U1 small nuclear ribonucleoprotein C              | Biological Replicate 1 Only | 1                           |
| P09661     | U2 small nuclear ribonucleoprotein A'             | Biological Replicate 1 Only | 1                           |
| O15042     | U2 snRNP-associated SURP motif-containing protein | Biological Replicate 1 Only | 1                           |
| O43290     | U4/U6.U5 tri-snRNP-associated protein 1           | Biological Replicate 1 Only | 1                           |
| Q9Y4Z0     | U6 snRNA-associated Sm-like protein LSm4          | Biological Replicate 1 Only | 1                           |



| Uniprot ID | Protein Name                                                   | Biological Replicate        | Number of Modified Peptides |
|------------|----------------------------------------------------------------|-----------------------------|-----------------------------|
| Q9UMX0     | Ubiquilin-1                                                    | Biological 1 and 2          | 2                           |
| Q9UHD9     | Ubiquilin-2                                                    | Biological Replicate 2 Only | 1                           |
| Q9NRR5     | Ubiquilin-4                                                    | Biological Replicate 2 Only | 1                           |
| P15374     | Ubiquitin carboxyl-terminal hydrolase isozyme L3               | Biological 1 and 2          | 2                           |
| P62979     | Ubiquitin-40S ribosomal protein S27a                           | Biological Replicate 2 Only | 1                           |
| P62987     | Ubiquitin-60S ribosomal protein L40                            | Biological Replicate 2 Only | 1                           |
| Q5T6F2     | Ubiquitin-associated protein 2                                 | Biological Replicate 1 Only | 1                           |
| Q14157     | Ubiquitin-associated protein 2-like                            | Biological 1 and 2          | 3                           |
| Q13885     | Ubiquitin-associated protein 2-like                            | Biological 1 and 2          | 10                          |
| P61088     | Ubiquitin-conjugating enzyme E2 N                              | Biological Replicate 1 Only | 1                           |
| Q15819     | Ubiquitin-conjugating enzyme E2 variant 2                      | Biological Replicate 2 Only | 1                           |
| P22314     | Ubiquitin-like modifier-activating enzyme 1                    | Biological 1 and 2          | 2                           |
| Q8N5S3     | Uncharacterized protein C2orf73                                | Biological Replicate 2 Only | 1                           |
| Q5T0Z8     | Uncharacterized protein C6orf132                               | Biological Replicate 1 Only | 1                           |
| Q96K31     | Uncharacterized protein C8orf76                                | Biological Replicate 1 Only | 1                           |
| Q92614     | Unconventional myosin-XVIIIa                                   | Biological Replicate 1 Only | 1                           |
| Q9H5V9     | UPF0428 protein CXorf56                                        | Biological Replicate 1 Only | 1                           |
| Q9UFG5     | UPF0449 protein C19orf25                                       | Biological Replicate 1 Only | 1                           |
| O00526     | Uroplakin-2                                                    | Biological Replicate 2 Only | 1                           |
| O95399     | Urotensin-2                                                    | Biological 1 and 2          | 2                           |
| P54727     | UV excision repair protein RAD23 homolog B                     | Biological 1 and 2          | 2                           |
| P86790     | Vacuolar fusion protein CCZ1 homolog B                         | Biological Replicate 2 Only | 1                           |
| Q9H270     | Vacuolar protein sorting-associated protein 11 homolog         | Biological Replicate 1 Only | 1                           |
| Q96RL7     | Vacuolar protein sorting-associated protein 13A                | Biological Replicate 2 Only | 1                           |
| Q9P1Q0     | Vacuolar protein sorting-associated protein 54                 | Biological Replicate 2 Only | 1                           |
| Q9UEU0     | Vesicle transport through interaction with t-SNAREs homolog 1B | Biological Replicate 1 Only | 1                           |
| Q15836     | Vesicle-associated membrane protein 3                          | Biological Replicate 1 Only | 1                           |
| O75396     | Vesicle-trafficking protein SEC22b                             | Biological Replicate 2 Only | 1                           |
| P08670     | Vimentin                                                       | Biological Replicate 1 Only | 2                           |
| P08670     | Vimentin                                                       | Biological 1 and 2          | 13                          |
| P18206     | Vinculin                                                       | Biological Replicate 2 Only | 1                           |

| Uniprot ID | Protein Name                                     | Biological Replicate        | Number of Modified Peptides |
|------------|--------------------------------------------------|-----------------------------|-----------------------------|
| P36543     | V-type proton ATPase subunit E 1                 | Biological Replicate 1 Only | 1                           |
| Q96A05     | V-type proton ATPase subunit E 2                 | Biological Replicate 1 Only | 1                           |
| Q15904     | V-type proton ATPase subunit S1                  | Biological Replicate 1 Only | 1                           |
| Q641Q2     | WASH complex subunit 2A                          | Biological Replicate 1 Only | 1                           |
| Q9Y3C0     | WASH complex subunit 3                           | Biological Replicate 1 Only | 1                           |
| Q9Y4E6     | WD repeat-containing protein 7                   | Biological Replicate 2 Only | 1                           |
| Q9Y2W2     | WW domain-binding protein 11                     | Biological 1 and 2          | 3                           |
| Q969T9     | WW domain-binding protein 2                      | Biological Replicate 1 Only | 1                           |
| Q9Y2T7     | Y-box-binding protein 2                          | Biological Replicate 1 Only | 1                           |
| P16989     | Y-box-binding protein 3                          | Biological 1 and 2          | 4                           |
| O00488     | Zinc finger protein 593                          | Biological Replicate 1 Only | 1                           |
| Q9ULD9     | Zinc finger protein 608                          | Biological Replicate 1 Only | 1                           |
| Q8NB50     | Zinc finger protein 62 homolog                   | Biological Replicate 1 Only | 1                           |
| P35789     | Zinc finger protein 93                           | Biological Replicate 1 Only | 1                           |
| P10070     | Zinc finger protein GLI2                         | Biological Replicate 2 Only | 1                           |
| Q96EF9     | Zinc fingers and homeoboxes protein 1, isoform 2 | Biological Replicate 1 Only | 1                           |

**Table S5.** IC-FPOP oxidatively modified proteins in 200 mM H<sub>2</sub>O<sub>2</sub> PIXY

| Uniprot ID | Protein Name                                         | Biological Replicate        | Number of Modified Peptides |
|------------|------------------------------------------------------|-----------------------------|-----------------------------|
| Q15029     | 116 kDa U5 small nuclear ribonucleoprotein component | Biological 1 and 2          | 2                           |
| P31946     | 14-3-3 protein beta/alpha                            | Biological Replicate 2 Only | 1                           |
| P62258     | 14-3-3 protein epsilon                               | Biological Replicate 2 Only | 1                           |
| P61981     | 14-3-3 protein gamma                                 | Biological Replicate 2 Only | 1                           |
| P61978     | 14-3-3 protein gamma                                 | Biological 1 and 2          | 5                           |
| P27348     | 14-3-3 protein theta                                 | Biological 1 and 2          | 3                           |
| Q99460     | 26S proteasome non-ATPase regulatory subunit 1       | Biological 1 and 2          | 3                           |
| O75832     | 26S proteasome non-ATPase regulatory subunit 10      | Biological Replicate 2 Only | 2                           |
| Q9UNM6     | 26S proteasome non-ATPase regulatory subunit 13      | Biological 1 and 2          | 4                           |
| O00487     | 26S proteasome non-ATPase regulatory subunit 14      | Biological Replicate 1 Only | 1                           |
| Q13200     | 26S proteasome non-ATPase regulatory subunit 2       | Biological Replicate 2 Only | 1                           |
| P61981     | 26S proteasome regulatory subunit 10B                | Biological 1 and 2          | 2                           |
| P17980     | 26S proteasome regulatory subunit 6A                 | Biological Replicate 2 Only | 2                           |
| P40227     | 26S proteasome regulatory subunit 6B                 | Biological 1 and 2          | 2                           |
| P35998     | 26S proteasome regulatory subunit 7                  | Biological Replicate 2 Only | 2                           |
| P62195     | 26S proteasome regulatory subunit 8                  | Biological Replicate 2 Only | 4                           |
| Q9Y3D3     | 28S ribosomal protein S16, mitochondrial             | Biological 1 and 2          | 2                           |
| P82663     | 28S ribosomal protein S25, mitochondrial             | Biological Replicate 2 Only | 4                           |
| P82930     | 28S ribosomal protein S34, mitochondrial             | Biological Replicate 1 Only | 1                           |
| P82673     | 28S ribosomal protein S35, mitochondrial             | Biological Replicate 2 Only | 1                           |
| P82932     | 28S ribosomal protein S6, mitochondrial              | Biological Replicate 1 Only | 1                           |
| Q9BYD1     | 39S ribosomal protein L13, mitochondrial             | Biological Replicate 2 Only | 1                           |
| P49406     | 39S ribosomal protein L19, mitochondrial             | Biological Replicate 2 Only | 1                           |
| Q9P0M9     | 39S ribosomal protein L27, mitochondrial             | Biological Replicate 2 Only | 1                           |
| Q9NYK5     | 39S ribosomal protein L39, mitochondrial             | Biological Replicate 2 Only | 1                           |
| Q8IXM3     | 39S ribosomal protein L41, mitochondrial             | Biological Replicate 2 Only | 1                           |
| Q9HD33     | 39S ribosomal protein L47, mitochondrial             | Biological Replicate 2 Only | 1                           |
| Q96GC5     | 39S ribosomal protein L48, mitochondrial             | Biological Replicate 2 Only | 1                           |
| Q99714     | 3-hydroxyacyl-CoA dehydrogenase type-2               | Biological Replicate 2 Only | 3                           |
| P31937     | 3-hydroxyisobutyrate dehydrogenase, mitochondrial    | Biological Replicate 2 Only | 1                           |

| Uniprot ID | Protein Name                                | Biological Replicate        | Number of Modified Peptides |
|------------|---------------------------------------------|-----------------------------|-----------------------------|
| P09110     | 3-ketoacyl-CoA thiolase, peroxisomal        | Biological Replicate 2 Only | 1                           |
| P46783     | 40S ribosomal protein S10                   | Biological Replicate 2 Only | 2                           |
| P46777     | 40S ribosomal protein S10                   | Biological Replicate 2 Only | 1                           |
| P25398     | 40S ribosomal protein S12                   | Biological Replicate 2 Only | 1                           |
| P62333     | 40S ribosomal protein S15                   | Biological 1 and 2          | 3                           |
| P08708     | 40S ribosomal protein S17                   | Biological Replicate 2 Only | 2                           |
| P62269     | 40S ribosomal protein S18                   | Biological Replicate 2 Only | 2                           |
| P39019     | 40S ribosomal protein S19                   | Biological Replicate 1 Only | 1                           |
| P63220     | 40S ribosomal protein S21                   | Biological Replicate 1 Only | 1                           |
| P62847     | 40S ribosomal protein S24                   | Biological Replicate 2 Only | 1                           |
| P42677     | 40S ribosomal protein S27                   | Biological Replicate 2 Only | 1                           |
| Q71UM5     | 40S ribosomal protein S27-like              | Biological Replicate 2 Only | 1                           |
| P23396     | 40S ribosomal protein S3                    | Biological Replicate 2 Only | 2                           |
| P61247     | 40S ribosomal protein S3a                   | Biological Replicate 1 Only | 1                           |
| P62701     | 40S ribosomal protein S4, X isoform         | Biological Replicate 1 Only | 1                           |
| P46060     | 40S ribosomal protein S5                    | Biological 1 and 2          | 4                           |
| P62753     | 40S ribosomal protein S6                    | Biological Replicate 1 Only | 1                           |
| P08865     | 40S ribosomal protein SA                    | Biological 1 and 2          | 3                           |
| P49189     | 4-trimethylaminobutyraldehyde dehydrogenase | Biological Replicate 2 Only | 2                           |
| P10809     | 60 kDa heat shock protein, mitochondrial    | Biological 1 and 2          | 5                           |
| P05388     | 60S acidic ribosomal protein P0             | Biological 1 and 2          | 3                           |
| Q8NHW5     | 60S acidic ribosomal protein P0-like        | Biological 1 and 2          | 3                           |
| P05386     | 60S acidic ribosomal protein P1             | Biological Replicate 1 Only | 1                           |
| P27635     | 60S ribosomal protein L10                   | Biological Replicate 1 Only | 1                           |
| P26373     | 60S ribosomal protein L13                   | Biological Replicate 2 Only | 1                           |
| P50914     | 60S ribosomal protein L14                   | Biological Replicate 2 Only | 1                           |
| P18621     | 60S ribosomal protein L17                   | Biological 1 and 2          | 2                           |
| P84098     | 60S ribosomal protein L19                   | Biological Replicate 1 Only | 1                           |
| P46778     | 60S ribosomal protein L21                   | Biological Replicate 1 Only | 2                           |
| P35268     | 60S ribosomal protein L22                   | Biological Replicate 2 Only | 1                           |
| P62829     | 60S ribosomal protein L23                   | Biological Replicate 1 Only | 1                           |

| Uniprot ID | Protein Name                                                     | Biological Replicate        | Number of Modified Peptides |
|------------|------------------------------------------------------------------|-----------------------------|-----------------------------|
| P83731     | 60S ribosomal protein L24                                        | Biological Replicate 2 Only | 2                           |
| P62841     | 60S ribosomal protein L32                                        | Biological 1 and 2          | 5                           |
| Q9Y3U8     | 60S ribosomal protein L36                                        | Biological Replicate 2 Only | 1                           |
| P36578     | 60S ribosomal protein L4                                         | Biological Replicate 2 Only | 1                           |
| P46087     | 60S ribosomal protein L5                                         | Biological Replicate 2 Only | 1                           |
| P62917     | 60S ribosomal protein L8                                         | Biological Replicate 2 Only | 1                           |
| P52209     | 6-phosphogluconate dehydrogenase, decarboxylating                | Biological Replicate 1 Only | 1                           |
| P10515     | 70 kDa mitochondrial autoantigen of primary biliary cirrhosis    | Biological 1 and 2          | 2                           |
| Q9UHI8     | A disintegrin and metalloproteinase with thrombospondin motifs 1 | Biological Replicate 1 Only | 1                           |
| Q8IZP0     | Abl interactor 1                                                 | Biological Replicate 1 Only | 1                           |
| Q9BWD1     | Acetyl-CoA acetyltransferase, cytosolic                          | Biological Replicate 2 Only | 1                           |
| P24752     | Acetyl-CoA acetyltransferase, mitochondrial                      | Biological Replicate 2 Only | 3                           |
| P39687     | Acidic leucine-rich nuclear phosphoprotein 32 family member A    | Biological Replicate 2 Only | 1                           |
| Q92688     | Acidic leucine-rich nuclear phosphoprotein 32 family member B    | Biological Replicate 2 Only | 1                           |
| Q99798     | Aconitate hydratase, mitochondrial                               | Biological Replicate 2 Only | 1                           |
| P68032     | Actin, alpha cardiac muscle 1                                    | Biological 1 and 2          | 4                           |
| P68133     | Actin, alpha skeletal muscle                                     | Biological 1 and 2          | 4                           |
| P62736     | Actin, aortic smooth muscle                                      | Biological 1 and 2          | 4                           |
| P60709     | Actin, cytoplasmic 1                                             | Biological 1 and 2          | 4                           |
| P60709     | Actin, cytoplasmic 1                                             | Biological Replicate 2 Only | 4                           |
| P63261     | Actin, cytoplasmic 2                                             | Biological 1 and 2          | 8                           |
| P63244     | Actin, gamma-enteric smooth muscle                               | Biological 1 and 2          | 2                           |
| O96019     | Actin-like protein 6A                                            | Biological Replicate 2 Only | 1                           |
| P61160     | Actin-related protein 2                                          | Biological Replicate 1 Only | 1                           |
| P61158     | Actin-related protein 3                                          | Biological Replicate 1 Only | 1                           |
| O95433     | Activator of 90 kDa heat shock protein ATPase homolog 1          | Biological 1 and 2          | 2                           |
| O95372     | Acyl-protein thioesterase 2                                      | Biological Replicate 1 Only | 1                           |
| Q6P587     | Acylpyruvase FAHD1, mitochondrial                                | Biological Replicate 2 Only | 1                           |
| P23526     | Adenosylhomocysteinase                                           | Biological Replicate 2 Only | 1                           |
| P54819     | Adenylate kinase 2, mitochondrial                                | Biological Replicate 2 Only | 1                           |
| P00568     | Adenylate kinase isoenzyme 1                                     | Biological Replicate 1 Only | 1                           |

| Uniprot ID | Protein Name                                                          | Biological Replicate        | Number of Modified Peptides |
|------------|-----------------------------------------------------------------------|-----------------------------|-----------------------------|
| Q01518     | Adenylyl cyclase-associated protein 1                                 | Biological Replicate 2 Only | 1                           |
| Q9HDC9     | Adipocyte plasma membrane-associated protein                          | Biological Replicate 2 Only | 1                           |
| P84077     | ADP-ribosylation factor 1                                             | Biological Replicate 1 Only | 1                           |
| P61204     | ADP-ribosylation factor 3                                             | Biological Replicate 1 Only | 1                           |
| P18085     | ADP-ribosylation factor 4                                             | Biological Replicate 1 Only | 1                           |
| P10109     | Adrenodoxin, mitochondrial                                            | Biological Replicate 2 Only | 1                           |
| Q03252     | A-kinase anchor protein 12                                            | Biological 1 and 2          | 2                           |
| P78371     | A-kinase anchor protein 12                                            | Biological 1 and 2          | 5                           |
| Q9ULX6     | A-kinase anchor protein 8-like                                        | Biological Replicate 2 Only | 1                           |
| Q99996     | A-kinase anchor protein 9                                             | Biological Replicate 1 Only | 1                           |
| P49588     | Alanine--tRNA ligase, cytoplasmic                                     | Biological Replicate 2 Only | 1                           |
| P30837     | Aldehyde dehydrogenase X, mitochondrial                               | Biological Replicate 2 Only | 1                           |
| P05091     | Aldehyde dehydrogenase, mitochondrial                                 | Biological Replicate 1 Only | 1                           |
| P12814     | Alpha-actinin-1                                                       | Biological Replicate 2 Only | 2                           |
| P35609     | Alpha-actinin-2                                                       | Biological Replicate 2 Only | 2                           |
| O43707     | Alpha-actinin-4                                                       | Biological Replicate 2 Only | 2                           |
| O43707     | Alpha-actinin-4                                                       | Biological 1 and 2          | 5                           |
| P61163     | Alpha-centractin                                                      | Biological Replicate 2 Only | 2                           |
| O43768     | Alpha-endosulfine                                                     | Biological Replicate 1 Only | 1                           |
| P06733     | Alpha-enolase                                                         | Biological 1 and 2          | 4                           |
| Q16352     | Alpha-internexin                                                      | Biological Replicate 2 Only | 2                           |
| P40222     | Alpha-taxilin                                                         | Biological Replicate 2 Only | 1                           |
| Q12904     | Aminoacyl tRNA synthase complex-interacting multifunctional protein 1 | Biological Replicate 2 Only | 1                           |
| Q92870     | Amyloid-beta A4 precursor protein-binding family B member 2           | Biological Replicate 1 Only | 1                           |
| Q4VCS5     | Angiomotin                                                            | Biological 1 and 2          | 3                           |
| Q9P0K7     | Ankycorbin                                                            | Biological Replicate 1 Only | 2                           |
| P08758     | Annexin A5                                                            | Biological Replicate 1 Only | 2                           |
| P08133     | Annexin A6                                                            | Biological Replicate 1 Only | 1                           |
| Q10567     | AP-1 complex subunit beta-1                                           | Biological Replicate 1 Only | 1                           |
| P63010     | AP-2 complex subunit beta                                             | Biological Replicate 1 Only | 1                           |
| Q13625     | Apoptosis-stimulating of p53 protein 2                                | Biological Replicate 2 Only | 1                           |

| Uniprot ID | Protein Name                                                            | Biological Replicate        | Number of Modified Peptides |
|------------|-------------------------------------------------------------------------|-----------------------------|-----------------------------|
| Q9UKV3     | Apoptotic chromatin condensation inducer in the nucleus                 | Biological 1 and 2          | 2                           |
| P53365     | Arfaptin-2                                                              | Biological Replicate 1 Only | 1                           |
| P14868     | Aspartate--tRNA ligase, cytoplasmic                                     | Biological Replicate 2 Only | 1                           |
| Q9UBB4     | Ataxin-10                                                               | Biological Replicate 1 Only | 1                           |
| P06576     | ATP synthase subunit beta, mitochondrial                                | Biological 1 and 2          | 9                           |
| O75947     | ATP synthase subunit d, mitochondrial                                   | Biological Replicate 2 Only | 1                           |
| P56385     | ATP synthase subunit e, mitochondrial                                   | Biological Replicate 2 Only | 1                           |
| P48047     | ATP synthase subunit O, mitochondrial                                   | Biological Replicate 2 Only | 1                           |
| Q9NRK6     | ATP-binding cassette sub-family B member 10, mitochondrial              | Biological Replicate 2 Only | 1                           |
| Q8NE71     | ATP-binding cassette sub-family F member 1                              | Biological Replicate 2 Only | 1                           |
| Q9UG63     | ATP-binding cassette sub-family F member 2                              | Biological Replicate 2 Only | 1                           |
| P53396     | ATP-citrate synthase                                                    | Biological Replicate 2 Only | 1                           |
| O76031     | ATP-dependent Clp protease ATP-binding subunit clpX-like, mitochondrial | Biological Replicate 2 Only | 1                           |
| Q16740     | ATP-dependent Clp protease proteolytic subunit, mitochondrial           | Biological Replicate 2 Only | 2                           |
| Q08211     | ATP-dependent RNA helicase A                                            | Biological Replicate 2 Only | 1                           |
| Q92499     | ATP-dependent RNA helicase DDX1                                         | Biological Replicate 2 Only | 1                           |
| Q9NVP1     | ATP-dependent RNA helicase DDX18                                        | Biological Replicate 2 Only | 1                           |
| Q9NUU7     | ATP-dependent RNA helicase DDX19A                                       | Biological Replicate 2 Only | 1                           |
| Q9NUU7     | ATP-dependent RNA helicase DDX19A                                       | Biological Replicate 1 Only | 1                           |
| Q9UMR2     | ATP-dependent RNA helicase DDX19B                                       | Biological Replicate 2 Only | 1                           |
| Q9GZR7     | ATP-dependent RNA helicase DDX24                                        | Biological Replicate 2 Only | 1                           |
| O00571     | ATP-dependent RNA helicase DDX3X                                        | Biological Replicate 2 Only | 1                           |
| O15523     | ATP-dependent RNA helicase DDX3Y                                        | Biological Replicate 2 Only | 1                           |
| Q7L2E3     | ATP-dependent RNA helicase DHX30                                        | Biological Replicate 2 Only | 1                           |
| O14497     | AT-rich interactive domain-containing protein 1A                        | Biological Replicate 1 Only | 1                           |
| Q96GD4     | Aurora kinase B                                                         | Biological Replicate 2 Only | 1                           |
| O95816     | BAG family molecular chaperone regulator 2                              | Biological Replicate 2 Only | 1                           |
| O75531     | Barrier-to-autointegration factor                                       | Biological Replicate 2 Only | 2                           |
| P35613     | Basigin                                                                 | Biological Replicate 2 Only | 1                           |
| Q16611     | Bcl-2 homologous antagonist/killer                                      | Biological Replicate 2 Only | 1                           |
| Q562R1     | Beta-actin-like protein 2                                               | Biological Replicate 2 Only | 1                           |

| Uniprot ID | Protein Name                                                   | Biological Replicate        | Number of Modified Peptides |
|------------|----------------------------------------------------------------|-----------------------------|-----------------------------|
| P42025     | Beta-centractin                                                | Biological Replicate 2 Only | 1                           |
| Q92538     | BFA-resistant GEF 1                                            | Biological Replicate 2 Only | 1                           |
| Q6ZP65     | BICD family-like cargo adapter 1                               | Biological Replicate 2 Only | 1                           |
| P07814     | Bifunctional glutamate/proline--tRNA ligase                    | Biological Replicate 2 Only | 1                           |
| P31939     | Bifunctional purine biosynthesis protein PURH                  | Biological Replicate 2 Only | 1                           |
| O95342     | Bile salt export pump                                          | Biological Replicate 1 Only | 1                           |
| Q13867     | Bleomycin hydrolase                                            | Biological 1 and 2          | 3                           |
| Q8NFK5     | BPI fold-containing family B member 6                          | Biological Replicate 2 Only | 1                           |
| Q9P287     | BRCA2 and CDKN1A-interacting protein                           | Biological Replicate 2 Only | 1                           |
| O75815     | Breast cancer anti-estrogen resistance protein 3               | Biological Replicate 2 Only | 1                           |
| Q969G3     | BRG1-associated factor 57                                      | Biological Replicate 2 Only | 1                           |
| P25440     | Bromodomain-containing protein 2                               | Biological Replicate 2 Only | 1                           |
| Q15059     | Bromodomain-containing protein 3                               | Biological Replicate 2 Only | 1                           |
| O60885     | Bromodomain-containing protein 4                               | Biological Replicate 2 Only | 1                           |
| Q96CX2     | BTB/POZ domain-containing protein KCTD12                       | Biological Replicate 2 Only | 2                           |
| P11586     | C-1-tetrahydrofolate synthase, cytoplasmic                     | Biological Replicate 1 Only | 2                           |
| Q8IYU8     | Calcium uptake protein 2, mitochondrial                        | Biological Replicate 2 Only | 1                           |
| Q9HB71     | Calcyclin-binding protein                                      | Biological Replicate 2 Only | 1                           |
| Q9BXY5     | Calcyphosin-2                                                  | Biological 1 and 2          | 2                           |
| P0DP25     | Calmodulin-3                                                   | Biological Replicate 2 Only | 1                           |
| P27824     | Calnexin                                                       | Biological Replicate 1 Only | 2                           |
| P04632     | Calpain small subunit 1                                        | Biological Replicate 2 Only | 1                           |
| P27797     | Calreticulin                                                   | Biological 1 and 2          | 4                           |
| P13861     | cAMP-dependent protein kinase type II-alpha regulatory subunit | Biological Replicate 2 Only | 1                           |
| Q6ZU35     | Cancer-related regulator of actin dynamics                     | Biological 1 and 2          | 2                           |
| Q14444     | Caprin-1                                                       | Biological Replicate 2 Only | 2                           |
| O75718     | Cartilage-associated protein                                   | Biological Replicate 2 Only | 1                           |
| Q8WXD9     | Caskin-1                                                       | Biological Replicate 2 Only | 1                           |
| P35221     | Catenin alpha-1                                                | Biological 1 and 2          | 3                           |
| Q9UI47     | Catenin alpha-3                                                | Biological Replicate 2 Only | 1                           |
| O60716     | Catenin delta-1                                                | Biological 1 and 2          | 2                           |



| Uniprot ID | Protein Name                                              | Biological Replicate        | Number of Modified Peptides |
|------------|-----------------------------------------------------------|-----------------------------|-----------------------------|
| P07339     | Cathepsin D                                               | Biological 1 and 2          | 3                           |
| P48960     | CD97 antigen                                              | Biological Replicate 2 Only | 1                           |
| Q99459     | Cell division cycle 5-like protein                        | Biological 1 and 2          | 2                           |
| P41208     | Centrin-2                                                 | Biological Replicate 2 Only | 1                           |
| Q03188     | Centromere protein C                                      | Biological Replicate 1 Only | 1                           |
| Q9H3R5     | Centromere protein H                                      | Biological Replicate 1 Only | 1                           |
| O43264     | Centromere/kinetochore protein zw10 homolog               | Biological Replicate 2 Only | 1                           |
| Q5SW79     | Centrosomal protein of 170 kDa                            | Biological Replicate 2 Only | 2                           |
| Q96GE4     | Centrosomal protein of 95 kDa                             | Biological Replicate 2 Only | 1                           |
| Q96L14     | Cep170-like protein                                       | Biological Replicate 2 Only | 1                           |
| Q9Y696     | Chloride intracellular channel protein 4                  | Biological Replicate 2 Only | 1                           |
| Q13185     | Chromobox protein homolog 3                               | Biological 1 and 2          | 2                           |
| Q14839     | Chromodomain-helicase-DNA-binding protein 4               | Biological Replicate 2 Only | 2                           |
| Q96G28     | Cilia- and flagella-associated protein 36                 | Biological 1 and 2          | 2                           |
| Q6ZU64     | Cilia- and flagella-associated protein 65                 | Biological Replicate 2 Only | 1                           |
| Q9C0B2     | Cilia- and flagella-associated protein 74                 | Biological Replicate 2 Only | 1                           |
| O75390     | Citrate synthase, mitochondrial                           | Biological Replicate 2 Only | 1                           |
| Q9HAW4     | Claspin                                                   | Biological Replicate 2 Only | 1                           |
| Q9C0J9     | Class E basic helix-loop-helix protein 41                 | Biological Replicate 2 Only | 1                           |
| Q00610     | Clathrin heavy chain 1                                    | Biological Replicate 2 Only | 2                           |
| P53675     | Clathrin heavy chain 2                                    | Biological Replicate 2 Only | 1                           |
| Q14677     | Clathrin interactor 1                                     | Biological Replicate 2 Only | 1                           |
| Q9UKF6     | Cleavage and polyadenylation specificity factor subunit 3 | Biological Replicate 2 Only | 1                           |
| Q16630     | Cleavage and polyadenylation specificity factor subunit 6 | Biological 1 and 2          | 2                           |
| P33240     | Cleavage stimulation factor subunit 2                     | Biological Replicate 2 Only | 1                           |
| P53621     | Coatomer subunit alpha                                    | Biological Replicate 2 Only | 1                           |
| P48444     | Coatomer subunit delta                                    | Biological Replicate 2 Only | 1                           |
| O14579     | Coatomer subunit epsilon                                  | Biological Replicate 2 Only | 1                           |
| Q9Y678     | Coatomer subunit gamma-1                                  | Biological Replicate 2 Only | 1                           |
| P23528     | Cofilin-1                                                 | Biological Replicate 2 Only | 1                           |
| Q96A33     | Coiled-coil domain-containing protein 47                  | Biological 1 and 2          | 2                           |

| Uniprot ID | Protein Name                                            | Biological Replicate        | Number of Modified Peptides |
|------------|---------------------------------------------------------|-----------------------------|-----------------------------|
| Q8NEL0     | Coiled-coil domain-containing protein 54                | Biological Replicate 1 Only | 1                           |
| Q16204     | Coiled-coil domain-containing protein 6                 | Biological Replicate 2 Only | 1                           |
| Q9H6F5     | Coiled-coil domain-containing protein 86                | Biological Replicate 1 Only | 1                           |
| P02452     | Collagen alpha-1                                        | Biological Replicate 1 Only | 1                           |
| P08123     | Collagen alpha-2                                        | Biological Replicate 2 Only | 1                           |
| P08572     | Collagen alpha-2                                        | Biological Replicate 2 Only | 1                           |
| Q14031     | Collagen alpha-6                                        | Biological Replicate 1 Only | 1                           |
| Q9BPX3     | Condensin complex subunit 3                             | Biological Replicate 2 Only | 1                           |
| Q8I WV2    | Contactin-4                                             | Biological Replicate 2 Only | 1                           |
| Q9UNS2     | COP9 signalosome complex subunit 3                      | Biological Replicate 2 Only | 1                           |
| Q9BT78     | COP9 signalosome complex subunit 4                      | Biological Replicate 2 Only | 1                           |
| O75131     | Copine-3                                                | Biological Replicate 1 Only | 1                           |
| O75367     | Core histone macro-H2A.1                                | Biological Replicate 2 Only | 1                           |
| Q9P0M6     | Core histone macro-H2A.2                                | Biological Replicate 2 Only | 1                           |
| Q9BR76     | Coronin-1B                                              | Biological Replicate 2 Only | 1                           |
| P78310     | Coxsackievirus and adenovirus receptor                  | Biological Replicate 2 Only | 1                           |
| P12277     | Creatine kinase B-type                                  | Biological 1 and 2          | 7                           |
| P06732     | Creatine kinase M-type                                  | Biological Replicate 1 Only | 1                           |
| P46109     | Crk-like protein                                        | Biological Replicate 1 Only | 1                           |
| P17812     | CTP synthase 1                                          | Biological Replicate 1 Only | 1                           |
| Q92879     | CUGBP Elav-like family member 1                         | Biological Replicate 1 Only | 1                           |
| Q8N6W0     | CUGBP Elav-like family member 5                         | Biological Replicate 2 Only | 1                           |
| P06493     | Cyclin-dependent kinase 1                               | Biological 1 and 2          | 3                           |
| Q9BWU1     | Cyclin-dependent kinase 19                              | Biological Replicate 2 Only | 1                           |
| P24941     | Cyclin-dependent kinase 2                               | Biological Replicate 2 Only | 1                           |
| Q00535     | Cyclin-dependent-like kinase 5                          | Biological Replicate 1 Only | 1                           |
| Q9UHD1     | Cysteine and histidine-rich domain-containing protein 1 | Biological Replicate 2 Only | 1                           |
| P31930     | Cytochrome b-c1 complex subunit 1, mitochondrial        | Biological Replicate 2 Only | 1                           |
| P22695     | Cytochrome b-c1 complex subunit 2, mitochondrial        | Biological Replicate 1 Only | 1                           |
| P20674     | Cytochrome c oxidase subunit 5A, mitochondrial          | Biological Replicate 2 Only | 1                           |
| O00483     | Cytochrome c oxidase subunit NDUF4A                     | Biological Replicate 2 Only | 1                           |

| Uniprot ID | Protein Name                                                   | Biological Replicate        | Number of Modified Peptides |
|------------|----------------------------------------------------------------|-----------------------------|-----------------------------|
| P08574     | Cytochrome c1, heme protein, mitochondrial                     | Biological Replicate 1 Only | 1                           |
| Q13409     | Cytoplasmic dynein 1 intermediate chain 2                      | Biological 1 and 2          | 2                           |
| Q07065     | Cytoskeleton-associated protein 4                              | Biological 1 and 2          | 2                           |
| Q14008     | Cytoskeleton-associated protein 5                              | Biological Replicate 2 Only | 1                           |
| P28838     | Cytosol aminopeptidase                                         | Biological 1 and 2          | 2                           |
| O43175     | D-3-phosphoglycerate dehydrogenase                             | Biological Replicate 2 Only | 2                           |
| Q96EP5     | DAZ-associated protein 1                                       | Biological Replicate 2 Only | 2                           |
| Q5BKZ1     | DBIRD complex subunit ZNF326                                   | Biological Replicate 2 Only | 1                           |
| Q9BTC0     | Death-inducer obliterator 1                                    | Biological Replicate 1 Only | 1                           |
| Q92608     | Dedicator of cytokinesis protein 2                             | Biological Replicate 2 Only | 1                           |
| Q9Y238     | Deleted in lung and esophageal cancer protein 1                | Biological Replicate 1 Only | 1                           |
| Q13011     | Delta                                                          | Biological Replicate 1 Only | 1                           |
| Q14126     | Desmoglein-2                                                   | Biological Replicate 2 Only | 2                           |
| Q9Y295     | Developmentally-regulated GTP-binding protein 1                | Biological Replicate 2 Only | 1                           |
| P09622     | Dihydrolipoyl dehydrogenase, mitochondrial                     | Biological Replicate 1 Only | 1                           |
| Q16555     | Dihydropyrimidinase-related protein 2                          | Biological Replicate 1 Only | 1                           |
| Q9Y2E4     | Disco-interacting protein 2 homolog C                          | Biological Replicate 1 Only | 1                           |
| O43184     | Disintegrin and metalloproteinase domain-containing protein 12 | Biological Replicate 2 Only | 1                           |
| Q12959     | Disks large homolog 1                                          | Biological Replicate 1 Only | 1                           |
| P04053     | DNA nucleotidylexotransferase                                  | Biological Replicate 1 Only | 1                           |
| Q92878     | DNA repair protein RAD50                                       | Biological Replicate 2 Only | 1                           |
| P49736     | DNA replication licensing factor MCM2                          | Biological Replicate 1 Only | 1                           |
| P25205     | DNA replication licensing factor MCM3                          | Biological 1 and 2          | 2                           |
| P22061     | DNA replication licensing factor MCM3                          | Biological 1 and 2          | 3                           |
| P33991     | DNA replication licensing factor MCM4                          | Biological 1 and 2          | 4                           |
| P33993     | DNA replication licensing factor MCM7                          | Biological Replicate 2 Only | 2                           |
| P11388     | DNA topoisomerase 2-alpha                                      | Biological Replicate 2 Only | 1                           |
| Q02880     | DNA topoisomerase 2-beta                                       | Biological Replicate 2 Only | 1                           |
| P78527     | DNA-dependent protein kinase catalytic subunit                 | Biological Replicate 2 Only | 1                           |
| O15160     | DNA-directed RNA polymerases I and III subunit RPAC1           | Biological Replicate 2 Only | 1                           |
| P31689     | DnaJ homolog subfamily A member 1                              | Biological Replicate 2 Only | 3                           |

| Uniprot ID | Protein Name                                               | Biological Replicate        | Number of Modified Peptides |
|------------|------------------------------------------------------------|-----------------------------|-----------------------------|
| O60884     | DnaJ homolog subfamily A member 2                          | Biological Replicate 1 Only | 1                           |
| Q99615     | DnaJ homolog subfamily C member 7                          | Biological Replicate 1 Only | 1                           |
| Q8WXX5     | DnaJ homolog subfamily C member 9                          | Biological Replicate 1 Only | 1                           |
| Q9P2X0     | Dolichol-phosphate mannosyltransferase subunit 3           | Biological Replicate 2 Only | 1                           |
| Q9Y673     | Dolichyl-phosphate beta-glucosyltransferase                | Biological Replicate 2 Only | 1                           |
| P49959     | Double-strand break repair protein MRE11                   | Biological Replicate 2 Only | 2                           |
| Q14919     | Dr1-associated corepressor                                 | Biological Replicate 1 Only | 1                           |
| Q9UJU6     | Drebrin-like protein                                       | Biological Replicate 2 Only | 1                           |
| P36507     | Dual specificity mitogen-activated protein kinase kinase 2 | Biological Replicate 2 Only | 1                           |
| Q14203     | Dynactin subunit 1                                         | Biological 1 and 2          | 2                           |
| O00429     | Dynamamin-1-like protein                                   | Biological 1 and 2          | 2                           |
| Q8TE73     | Dynein heavy chain 5, axonemal                             | Biological Replicate 2 Only | 1                           |
| Q5VTR2     | E3 ubiquitin-protein ligase BRE1A                          | Biological Replicate 1 Only | 1                           |
| Q7Z6Z7     | E3 ubiquitin-protein ligase HUWE1                          | Biological Replicate 2 Only | 1                           |
| Q7Z6E9     | E3 ubiquitin-protein ligase RBBP6                          | Biological Replicate 2 Only | 1                           |
| Q9NWF9     | E3 ubiquitin-protein ligase RNF216                         | Biological Replicate 2 Only | 1                           |
| Q14669     | E3 ubiquitin-protein ligase TRIP12                         | Biological Replicate 2 Only | 1                           |
| Q96T88     | E3 ubiquitin-protein ligase UHRF1                          | Biological Replicate 2 Only | 1                           |
| Q16206     | Ecto-NOX disulfide-thiol exchanger 2                       | Biological Replicate 1 Only | 1                           |
| A4FU69     | EF-hand calcium-binding domain-containing protein 5        | Biological Replicate 1 Only | 1                           |
| Q9H4M9     | EH domain-containing protein 1                             | Biological 1 and 2          | 2                           |
| Q9NZN3     | EH domain-containing protein 3                             | Biological 1 and 2          | 2                           |
| Q92616     | eIF-2-alpha kinase activator GCN1                          | Biological Replicate 1 Only | 1                           |
| Q15717     | ELAV-like protein 1                                        | Biological Replicate 2 Only | 1                           |
| P68104     | Elongation factor 1-alpha 1                                | Biological Replicate 2 Only | 3                           |
| P68104     | Elongation factor 1-alpha 1                                | Biological Replicate 2 Only | 1                           |
| Q05639     | Elongation factor 1-alpha 2                                | Biological Replicate 2 Only | 1                           |
| P29692     | Elongation factor 1-delta                                  | Biological Replicate 2 Only | 1                           |
| P13639     | Elongation factor 2                                        | Biological 1 and 2          | 13                          |
| P43897     | Elongation factor Ts, mitochondrial                        | Biological Replicate 1 Only | 1                           |
| P49368     | Elongation factor Tu, mitochondrial                        | Biological 1 and 2          | 3                           |

| Uniprot ID | Protein Name                                                      | Biological Replicate        | Number of Modified Peptides |
|------------|-------------------------------------------------------------------|-----------------------------|-----------------------------|
| Q15369     | Elongin-C                                                         | Biological Replicate 2 Only | 1                           |
| P50402     | Emerin                                                            | Biological Replicate 2 Only | 1                           |
| Q99961     | Endophilin-A2                                                     | Biological Replicate 2 Only | 1                           |
| P11021     | Endoplasmic reticulum chaperone BiP                               | Biological Replicate 2 Only | 5                           |
| P14625     | Endoplasmin                                                       | Biological 1 and 2          | 7                           |
| Q9UPY3     | Endoribonuclease Dicer                                            | Biological Replicate 2 Only | 1                           |
| P30084     | Enoyl-CoA hydratase, mitochondrial                                | Biological Replicate 1 Only | 1                           |
| P60763     | Eukaryotic initiation factor 4A-I                                 | Biological 1 and 2          | 2                           |
| Q14240     | Eukaryotic initiation factor 4A-II                                | Biological Replicate 2 Only | 1                           |
| P38919     | Eukaryotic initiation factor 4A-III                               | Biological Replicate 2 Only | 1                           |
| P62495     | Eukaryotic peptide chain release factor subunit 1                 | Biological Replicate 1 Only | 2                           |
| P47813     | Eukaryotic translation initiation factor 1A, X-chromosomal        | Biological Replicate 2 Only | 1                           |
| P05198     | Eukaryotic translation initiation factor 2 subunit 1              | Biological Replicate 2 Only | 1                           |
| P20042     | Eukaryotic translation initiation factor 2 subunit 2              | Biological Replicate 2 Only | 1                           |
| Q9BY44     | Eukaryotic translation initiation factor 2A                       | Biological Replicate 2 Only | 2                           |
| Q14152     | Eukaryotic translation initiation factor 3 subunit A              | Biological Replicate 2 Only | 2                           |
| P55884     | Eukaryotic translation initiation factor 3 subunit B              | Biological 1 and 2          | 2                           |
| P55072     | Eukaryotic translation initiation factor 3 subunit B              | Biological 1 and 2          | 4                           |
| Q99613     | Eukaryotic translation initiation factor 3 subunit C              | Biological Replicate 2 Only | 2                           |
| B5ME19     | Eukaryotic translation initiation factor 3 subunit C-like protein | Biological Replicate 2 Only | 2                           |
| O15371     | Eukaryotic translation initiation factor 3 subunit D              | Biological Replicate 2 Only | 1                           |
| P60228     | Eukaryotic translation initiation factor 3 subunit E              | Biological Replicate 2 Only | 1                           |
| O00303     | Eukaryotic translation initiation factor 3 subunit F              | Biological Replicate 2 Only | 2                           |
| Q13347     | Eukaryotic translation initiation factor 3 subunit I              | Biological 1 and 2          | 2                           |
| Q7L2H7     | Eukaryotic translation initiation factor 3 subunit M              | Biological 1 and 2          | 2                           |
| Q04637     | Eukaryotic translation initiation factor 4 gamma 1                | Biological Replicate 1 Only | 1                           |
| P78344     | Eukaryotic translation initiation factor 4 gamma 2                | Biological Replicate 2 Only | 1                           |
| O60573     | Eukaryotic translation initiation factor 4E type 2                | Biological Replicate 1 Only | 1                           |
| P63241     | Eukaryotic translation initiation factor 5A-1                     | Biological 1 and 2          | 2                           |
| Q6IS14     | Eukaryotic translation initiation factor 5A-1-like                | Biological 1 and 2          | 2                           |
| Q9GZV4     | Eukaryotic translation initiation factor 5A-2                     | Biological Replicate 1 Only | 1                           |

| Uniprot ID | Protein Name                                  | Biological Replicate        | Number of Modified Peptides |
|------------|-----------------------------------------------|-----------------------------|-----------------------------|
| P56537     | Eukaryotic translation initiation factor 6    | Biological Replicate 2 Only | 1                           |
| O14980     | Exportin-1                                    | Biological Replicate 2 Only | 2                           |
| P54577     | Exportin-2                                    | Biological 1 and 2          | 2                           |
| Q9HAV4     | Exportin-5                                    | Biological 1 and 2          | 2                           |
| Q9Y5B9     | FACT complex subunit SPT16                    | Biological Replicate 2 Only | 1                           |
| Q08945     | FACT complex subunit SSRP1                    | Biological Replicate 2 Only | 1                           |
| P52907     | F-actin-capping protein subunit alpha-1       | Biological Replicate 2 Only | 1                           |
| P47756     | F-actin-capping protein subunit beta          | Biological Replicate 1 Only | 1                           |
| Q96AE4     | Far upstream element-binding protein 1        | Biological 1 and 2          | 2                           |
| Q92945     | Far upstream element-binding protein 2        | Biological 1 and 2          | 5                           |
| Q96I24     | Far upstream element-binding protein 3        | Biological Replicate 2 Only | 2                           |
| P49321     | Fatty acid synthase                           | Biological 1 and 2          | 2                           |
| P23142     | Fibulin-1                                     | Biological Replicate 2 Only | 1                           |
| P21333     | Filamin-A                                     | Biological Replicate 2 Only | 2                           |
| O75369     | Filamin-B                                     | Biological Replicate 2 Only | 4                           |
| O75955     | Flotillin-1                                   | Biological Replicate 1 Only | 1                           |
| Q14254     | Flotillin-2                                   | Biological Replicate 1 Only | 1                           |
| P04075     | Fructose-bisphosphate aldolase A              | Biological Replicate 1 Only | 1                           |
| P07954     | Fumarate hydratase, mitochondrial             | Biological Replicate 1 Only | 2                           |
| Q13569     | G/T mismatch-specific thymine DNA glycosylase | Biological Replicate 2 Only | 1                           |
| Q9H3C7     | Gametogenetin-binding protein 2               | Biological Replicate 1 Only | 1                           |
| Q07666     | GAP-associated tyrosine phosphoprotein p62    | Biological Replicate 1 Only | 1                           |
| P35269     | General transcription factor IIF subunit 1    | Biological Replicate 1 Only | 1                           |
| O60763     | General vesicular transport factor p115       | Biological Replicate 2 Only | 1                           |
| Q8N2G8     | GH3 domain-containing protein                 | Biological Replicate 2 Only | 1                           |
| Q96EK6     | Glucosamine 6-phosphate N-acetyltransferase   | Biological Replicate 2 Only | 1                           |
| P06744     | Glucose-6-phosphate isomerase                 | Biological Replicate 2 Only | 1                           |
| P14314     | Glucosidase 2 subunit beta                    | Biological 1 and 2          | 2                           |
| P00367     | Glutamate dehydrogenase 1, mitochondrial      | Biological Replicate 1 Only | 2                           |
| O94925     | Glutaminase kidney isoform, mitochondrial     | Biological Replicate 2 Only | 1                           |
| P47897     | Glutamine--tRNA ligase                        | Biological Replicate 2 Only | 1                           |

| Uniprot ID | Protein Name                              | Biological Replicate        | Number of Modified Peptides |
|------------|-------------------------------------------|-----------------------------|-----------------------------|
| Q92947     | Glutaryl-CoA dehydrogenase, mitochondrial | Biological Replicate 2 Only | 1                           |
| Q9Y2Q3     | Glutathione S-transferase kappa 1         | Biological 1 and 2          | 3                           |
| P78417     | Glutathione S-transferase omega-1         | Biological Replicate 2 Only | 1                           |
| P04406     | Glyceraldehyde-3-phosphate dehydrogenase  | Biological Replicate 2 Only | 3                           |
| A6NDG6     | Glycerol-3-phosphate phosphatase          | Biological Replicate 1 Only | 1                           |
| Q07021     | Glycoprotein gC1qBP                       | Biological 1 and 2          | 3                           |
| P49915     | GMP synthase                              | Biological Replicate 1 Only | 1                           |
| Q9H3P7     | Golgi resident protein GCP60              | Biological Replicate 1 Only | 1                           |
| Q08378     | Golgin subfamily A member 3               | Biological Replicate 2 Only | 1                           |
| Q9NYA3     | Golgin subfamily A member 6A              | Biological Replicate 2 Only | 1                           |
| A6NDN3     | Golgin subfamily A member 6B              | Biological Replicate 2 Only | 1                           |
| A6NDK9     | Golgin subfamily A member 6C              | Biological Replicate 2 Only | 1                           |
| P0CG33     | Golgin subfamily A member 6D              | Biological Replicate 2 Only | 1                           |
| Q9UHW5     | GPN-loop GTPase 3                         | Biological Replicate 2 Only | 1                           |
| Q6Y7W6     | GRB10-interacting GYF protein 2           | Biological Replicate 2 Only | 1                           |
| Q4V328     | GRIP1-associated protein 1                | Biological Replicate 2 Only | 1                           |
| Q9HAV7     | GrpE protein homolog 1, mitochondrial     | Biological Replicate 1 Only | 1                           |
| O00178     | GTP-binding protein 1                     | Biological Replicate 2 Only | 1                           |
| Q9NR31     | GTP-binding protein SAR1a                 | Biological Replicate 1 Only | 1                           |
| P61952     | Guanine nucleotide-binding protein G      | Biological Replicate 1 Only | 1                           |
| P62879     | Guanine nucleotide-binding protein G      | Biological Replicate 2 Only | 1                           |
| Q9UBI6     | Guanine nucleotide-binding protein G      | Biological Replicate 2 Only | 1                           |
| Q9BVP2     | Guanine nucleotide-binding protein-like 3 | Biological Replicate 1 Only | 1                           |
| P32455     | Guanylate-binding protein 1               | Biological Replicate 1 Only | 1                           |
| Q9BT25     | HAUS augmin-like complex subunit 8        | Biological Replicate 2 Only | 1                           |
| P0DMV9     | Heat shock 70 kDa protein 1B              | Biological Replicate 2 Only | 2                           |
| P0DMV9     | Heat shock 70 kDa protein 1B              | Biological 1 and 2          | 12                          |
| P34931     | Heat shock 70 kDa protein 1-like          | Biological Replicate 2 Only | 4                           |
| P34932     | Heat shock 70 kDa protein 4               | Biological 1 and 2          | 2                           |
| P17066     | Heat shock 70 kDa protein 6               | Biological Replicate 2 Only | 1                           |
| P17066     | Heat shock 70 kDa protein 6               | Biological Replicate 2 Only | 2                           |

| Uniprot ID | Protein Name                                             | Biological Replicate        | Number of Modified Peptides |
|------------|----------------------------------------------------------|-----------------------------|-----------------------------|
| P11142     | Heat shock cognate 71 kDa protein                        | Biological Replicate 2 Only | 5                           |
| Q92598     | Heat shock protein 105 kDa                               | Biological Replicate 1 Only | 1                           |
| P07900     | Heat shock protein HSP 90-alpha                          | Biological Replicate 2 Only | 1                           |
| P08238     | Heat shock protein HSP 90-beta                           | Biological 1 and 2          | 3                           |
| P08238     | Heat shock protein HSP 90-beta                           | Biological Replicate 2 Only | 1                           |
| P09601     | Heme oxygenase 1                                         | Biological 1 and 2          | 2                           |
| P30519     | Heme oxygenase 2                                         | Biological Replicate 1 Only | 1                           |
| Q9NZC9     | HepA-related protein                                     | Biological Replicate 2 Only | 1                           |
| P51858     | Hepatoma-derived growth factor                           | Biological Replicate 1 Only | 1                           |
| Q7Z4V5     | Hepatoma-derived growth factor-related protein 2         | Biological Replicate 1 Only | 1                           |
| Q99729     | Heterogeneous nuclear ribonucleoprotein A/B              | Biological Replicate 2 Only | 1                           |
| P09651     | Heterogeneous nuclear ribonucleoprotein A1               | Biological Replicate 2 Only | 1                           |
| P51991     | Heterogeneous nuclear ribonucleoprotein A3               | Biological Replicate 2 Only | 2                           |
| Q14103     | Heterogeneous nuclear ribonucleoprotein D0               | Biological 1 and 2          | 4                           |
| O14979     | Heterogeneous nuclear ribonucleoprotein D-like           | Biological 1 and 2          | 2                           |
| P52597     | Heterogeneous nuclear ribonucleoprotein F                | Biological Replicate 2 Only | 1                           |
| P31943     | Heterogeneous nuclear ribonucleoprotein H                | Biological 1 and 2          | 5                           |
| P55795     | Heterogeneous nuclear ribonucleoprotein H2               | Biological 1 and 2          | 2                           |
| P55795     | Heterogeneous nuclear ribonucleoprotein H2               | Biological Replicate 2 Only | 3                           |
| P31942     | Heterogeneous nuclear ribonucleoprotein H3               | Biological Replicate 1 Only | 2                           |
| P61758     | Heterogeneous nuclear ribonucleoprotein K                | Biological 1 and 2          | 2                           |
| P14866     | Heterogeneous nuclear ribonucleoprotein L                | Biological Replicate 2 Only | 4                           |
| O60506     | Heterogeneous nuclear ribonucleoprotein Q                | Biological Replicate 2 Only | 3                           |
| O43390     | Heterogeneous nuclear ribonucleoprotein R                | Biological Replicate 2 Only | 1                           |
| Q00839     | Heterogeneous nuclear ribonucleoprotein U                | Biological Replicate 2 Only | 3                           |
| Q9BUJ2     | Heterogeneous nuclear ribonucleoprotein U-like protein 1 | Biological Replicate 1 Only | 1                           |
| P22626     | Heterogeneous nuclear ribonucleoproteins A2/B1           | Biological Replicate 2 Only | 4                           |
| P07910     | Heterogeneous nuclear ribonucleoproteins C1/C2           | Biological Replicate 2 Only | 1                           |
| P19367     | Hexokinase-1                                             | Biological Replicate 2 Only | 1                           |
| P52789     | Hexokinase-2                                             | Biological Replicate 2 Only | 1                           |
| P52790     | Hexokinase-3                                             | Biological Replicate 2 Only | 1                           |



| Uniprot ID | Protein Name                                 | Biological Replicate        | Number of Modified Peptides |
|------------|----------------------------------------------|-----------------------------|-----------------------------|
| Q6UWX4     | HHIP-like protein 2                          | Biological Replicate 2 Only | 1                           |
| P09429     | High mobility group protein B1               | Biological 1 and 2          | 2                           |
| P26583     | High mobility group protein B2               | Biological Replicate 2 Only | 1                           |
| O15347     | High mobility group protein B3               | Biological Replicate 2 Only | 1                           |
| P49773     | Histidine triad nucleotide-binding protein 1 | Biological Replicate 1 Only | 1                           |
| Q13547     | Histone deacetylase 1                        | Biological 1 and 2          | 3                           |
| Q92769     | Histone deacetylase 2                        | Biological 1 and 2          | 3                           |
| Q92769     | Histone deacetylase 2                        | Biological Replicate 2 Only | 2                           |
| P16401     | Histone H1.5                                 | Biological Replicate 2 Only | 1                           |
| P0C0S8     | Histone H2A type 1                           | Biological Replicate 2 Only | 1                           |
| P04908     | Histone H2A type 1-B/E                       | Biological Replicate 2 Only | 1                           |
| Q93077     | Histone H2A type 1-C                         | Biological Replicate 2 Only | 1                           |
| P20671     | Histone H2A type 1-D                         | Biological Replicate 2 Only | 1                           |
| Q96KK5     | Histone H2A type 1-H                         | Biological Replicate 2 Only | 1                           |
| Q99878     | Histone H2A type 1-J                         | Biological Replicate 2 Only | 1                           |
| Q6F113     | Histone H2A type 2-A                         | Biological Replicate 2 Only | 1                           |
| Q16777     | Histone H2A type 2-C                         | Biological Replicate 2 Only | 1                           |
| Q7L7L0     | Histone H2A type 3                           | Biological Replicate 2 Only | 1                           |
| Q9BTM1     | Histone H2A.J                                | Biological Replicate 2 Only | 1                           |
| Q96A08     | Histone H2B type 1-A                         | Biological 1 and 2          | 2                           |
| P33778     | Histone H2B type 1-B                         | Biological 1 and 2          | 5                           |
| P62807     | Histone H2B type 1-C/E/F/G/I                 | Biological 1 and 2          | 4                           |
| P58876     | Histone H2B type 1-D                         | Biological 1 and 2          | 4                           |
| Q93079     | Histone H2B type 1-H                         | Biological 1 and 2          | 4                           |
| P06899     | Histone H2B type 1-J                         | Biological 1 and 2          | 5                           |
| O60814     | Histone H2B type 1-K                         | Biological 1 and 2          | 4                           |
| Q99880     | Histone H2B type 1-L                         | Biological 1 and 2          | 3                           |
| Q99879     | Histone H2B type 1-M                         | Biological 1 and 2          | 4                           |
| Q99877     | Histone H2B type 1-N                         | Biological 1 and 2          | 4                           |
| P23527     | Histone H2B type 1-O                         | Biological 1 and 2          | 5                           |
| Q16778     | Histone H2B type 2-E                         | Biological 1 and 2          | 5                           |

| Uniprot ID | Protein Name                                                      | Biological Replicate        | Number of Modified Peptides |
|------------|-------------------------------------------------------------------|-----------------------------|-----------------------------|
| Q5QNW6     | Histone H2B type 2-F                                              | Biological 1 and 2          | 4                           |
| Q8N257     | Histone H2B type 3-B                                              | Biological 1 and 2          | 4                           |
| P57053     | Histone H2B type F-S                                              | Biological 1 and 2          | 4                           |
| P62805     | Histone H4                                                        | Biological Replicate 2 Only | 2                           |
| Q99525     | Histone H4-like protein type G                                    | Biological Replicate 1 Only | 1                           |
| Q16576     | Histone-binding protein RBBP7                                     | Biological Replicate 2 Only | 3                           |
| Q9NR48     | Histone-lysine N-methyltransferase ASH1L                          | Biological 1 and 2          | 2                           |
| O43719     | HIV Tat-specific factor 1                                         | Biological Replicate 1 Only | 1                           |
| P51610     | Host cell factor 1                                                | Biological Replicate 1 Only | 1                           |
| P50502     | Hsc70-interacting protein                                         | Biological Replicate 2 Only | 1                           |
| Q9NZL4     | Hsp70-binding protein 1                                           | Biological Replicate 1 Only | 1                           |
| Q16543     | Hsp90 co-chaperone Cdc37                                          | Biological Replicate 1 Only | 1                           |
| Q6YN16     | Hydroxysteroid dehydrogenase-like protein 2                       | Biological Replicate 2 Only | 2                           |
| Q9Y4L1     | Hypoxia up-regulated protein 1                                    | Biological Replicate 2 Only | 3                           |
| P52292     | Importin subunit alpha-1                                          | Biological Replicate 2 Only | 2                           |
| Q14974     | Importin subunit beta-1                                           | Biological 1 and 2          | 2                           |
| Q8TEX9     | Importin-4                                                        | Biological Replicate 2 Only | 1                           |
| O00410     | Importin-5                                                        | Biological Replicate 2 Only | 1                           |
| O95373     | Importin-7                                                        | Biological Replicate 2 Only | 1                           |
| Q15181     | Inorganic pyrophosphatase                                         | Biological Replicate 1 Only | 1                           |
| P12268     | Inosine-5'-monophosphate dehydrogenase 2                          | Biological Replicate 2 Only | 2                           |
| Q9NPH2     | Inositol-3-phosphate synthase 1                                   | Biological Replicate 2 Only | 1                           |
| Q9NZI8     | Insulin-like growth factor 2 mRNA-binding protein 1               | Biological Replicate 2 Only | 1                           |
| Q9Y6M1     | Insulin-like growth factor 2 mRNA-binding protein 2               | Biological Replicate 2 Only | 1                           |
| O00425     | Insulin-like growth factor 2 mRNA-binding protein 3               | Biological Replicate 2 Only | 1                           |
| O00425     | Insulin-like growth factor 2 mRNA-binding protein 3               | Biological Replicate 1 Only | 1                           |
| Q9H0C8     | Integrin-linked kinase-associated serine/threonine phosphatase 2C | Biological Replicate 2 Only | 1                           |
| Q13418     | Integrin-linked protein kinase                                    | Biological 1 and 2          | 2                           |
| Q86UX2     | Inter-alpha-trypsin inhibitor heavy chain H5                      | Biological Replicate 2 Only | 1                           |
| P19525     | Interferon-induced, double-stranded RNA-activated protein kinase  | Biological Replicate 2 Only | 1                           |
| Q12905     | Interleukin enhancer-binding factor 2                             | Biological 1 and 2          | 3                           |

| Uniprot ID | Protein Name                                             | Biological Replicate        | Number of Modified Peptides |
|------------|----------------------------------------------------------|-----------------------------|-----------------------------|
| Q12906     | Interleukin enhancer-binding factor 3                    | Biological 1 and 2          | 7                           |
| Q96AB3     | Isochorismatase domain-containing protein 2              | Biological Replicate 2 Only | 1                           |
| O43837     | Isocitrate dehydrogenase                                 | Biological Replicate 2 Only | 3                           |
| P48735     | Isocitrate dehydrogenase                                 | Biological Replicate 2 Only | 1                           |
| P41252     | Isoleucine--tRNA ligase, cytoplasmic                     | Biological Replicate 2 Only | 1                           |
| O94819     | Kelch repeat and BTB domain-containing protein 11        | Biological Replicate 2 Only | 1                           |
| P05783     | Keratin, type I cytoskeletal 18                          | Biological Replicate 1 Only | 1                           |
| P05787     | Keratin, type II cytoskeletal 8                          | Biological Replicate 2 Only | 1                           |
| Q8IVT5     | Kinase suppressor of Ras 1                               | Biological Replicate 1 Only | 1                           |
| Q86UP2     | Kinectin                                                 | Biological 1 and 2          | 3                           |
| P33176     | Kinesin-1 heavy chain                                    | Biological Replicate 2 Only | 2                           |
| Q9H9P8     | L-2-hydroxyglutarate dehydrogenase, mitochondrial        | Biological Replicate 2 Only | 1                           |
| Q04760     | Lactoylglutathione lyase                                 | Biological Replicate 1 Only | 1                           |
| P42025     | Lamina-associated polypeptide 2, isoform alpha           | Biological Replicate 2 Only | 1                           |
| P18669     | Lamin-B1                                                 | Biological 1 and 2          | 3                           |
| Q02952     | Lamin-B2                                                 | Biological 1 and 2          | 2                           |
| Q6PKG0     | La-related protein 1                                     | Biological Replicate 2 Only | 1                           |
| Q92615     | La-related protein 4B                                    | Biological Replicate 1 Only | 1                           |
| Q4G0J3     | La-related protein 7                                     | Biological Replicate 1 Only | 1                           |
| P46379     | Large proline-rich protein BAG6                          | Biological Replicate 1 Only | 2                           |
| P42166     | Leucine-rich PPR motif-containing protein, mitochondrial | Biological Replicate 2 Only | 1                           |
| Q9Y608     | Leucine-rich repeat flightless-interacting protein 2     | Biological Replicate 2 Only | 1                           |
| O75325     | Leucine-rich repeat neuronal protein 2                   | Biological Replicate 1 Only | 1                           |
| Q96AG4     | Leucine-rich repeat-containing protein 59                | Biological Replicate 2 Only | 1                           |
| Q9P2J5     | Leucine--tRNA ligase, cytoplasmic                        | Biological Replicate 2 Only | 1                           |
| P09960     | Leukotriene A-4 hydrolase                                | Biological Replicate 2 Only | 1                           |
| Q86W92     | Liprin-beta-1                                            | Biological Replicate 2 Only | 1                           |
| P00338     | L-lactate dehydrogenase A chain                          | Biological Replicate 1 Only | 2                           |
| P07195     | L-lactate dehydrogenase B chain                          | Biological Replicate 1 Only | 1                           |
| P36776     | Lon protease homolog, mitochondrial                      | Biological Replicate 2 Only | 1                           |
| P05455     | Lupus La protein                                         | Biological Replicate 1 Only | 2                           |

| Uniprot ID | Protein Name                                                  | Biological Replicate        | Number of Modified Peptides |
|------------|---------------------------------------------------------------|-----------------------------|-----------------------------|
| Q9NRZ9     | Lymphoid-specific helicase                                    | Biological Replicate 1 Only | 1                           |
| Q8NHM5     | Lysine-specific demethylase 2B                                | Biological Replicate 2 Only | 1                           |
| O60341     | Lysine-specific histone demethylase 1A                        | Biological Replicate 2 Only | 1                           |
| Q15046     | Lysine--tRNA ligase                                           | Biological Replicate 1 Only | 2                           |
| P10253     | Lysosomal alpha-glucosidase                                   | Biological Replicate 1 Only | 1                           |
| Q9NZW5     | MAGUK p55 subfamily member 6                                  | Biological Replicate 2 Only | 1                           |
| P40926     | Malate dehydrogenase, mitochondrial                           | Biological Replicate 2 Only | 3                           |
| O43451     | Maltase-glucoamylase, intestinal                              | Biological Replicate 1 Only | 1                           |
| P42704     | Matrin-3                                                      | Biological Replicate 2 Only | 3                           |
| P30153     | Medium tumor antigen-associated 61 kDa protein                | Biological Replicate 2 Only | 1                           |
| O60732     | Melanoma-associated antigen C1                                | Biological Replicate 1 Only | 1                           |
| Q6ZN28     | Metastasis-associated in colon cancer protein 1               | Biological Replicate 1 Only | 1                           |
| P56192     | Methionine--tRNA ligase, cytoplasmic                          | Biological Replicate 2 Only | 1                           |
| O95983     | Methyl-CpG-binding domain protein 3                           | Biological Replicate 2 Only | 1                           |
| P22033     | Methylmalonyl-CoA mutase, mitochondrial                       | Biological Replicate 1 Only | 1                           |
| Q9BRQ6     | MICOS complex subunit MIC25                                   | Biological Replicate 2 Only | 1                           |
| Q16891     | MICOS complex subunit MIC60                                   | Biological Replicate 2 Only | 1                           |
| P27816     | Microtubule-associated protein 4                              | Biological Replicate 1 Only | 2                           |
| Q9NZJ7     | Mitochondrial carrier homolog 1                               | Biological Replicate 2 Only | 1                           |
| O14925     | Mitochondrial import inner membrane translocase subunit Tim23 | Biological Replicate 2 Only | 1                           |
| Q9NS69     | Mitochondrial import receptor subunit TOM22 homolog           | Biological Replicate 2 Only | 1                           |
| O96008     | Mitochondrial import receptor subunit TOM40 homolog           | Biological Replicate 2 Only | 1                           |
| O94826     | Mitochondrial import receptor subunit TOM70                   | Biological Replicate 2 Only | 2                           |
| O95202     | Mitochondrial proton/calcium exchanger protein                | Biological Replicate 2 Only | 1                           |
| P28482     | Mitogen-activated protein kinase 1                            | Biological Replicate 2 Only | 1                           |
| O43684     | Mitotic checkpoint protein BUB3                               | Biological 1 and 2          | 3                           |
| Q6NZ67     | Mitotic-spindle organizing protein 2B                         | Biological 1 and 2          | 2                           |
| P26038     | Moesin                                                        | Biological Replicate 2 Only | 1                           |
| P78406     | mRNA export factor                                            | Biological Replicate 1 Only | 1                           |
| Q9NPI6     | mRNA-decapping enzyme 1A                                      | Biological Replicate 2 Only | 1                           |
| P22234     | Multifunctional protein ADE2                                  | Biological Replicate 2 Only | 1                           |

| Uniprot ID | Protein Name                                                 | Biological Replicate        | Number of Modified Peptides |
|------------|--------------------------------------------------------------|-----------------------------|-----------------------------|
| Q96EY5     | Multivesicular body subunit 12A                              | Biological Replicate 2 Only | 1                           |
| Q6P1R3     | Myb/SANT-like DNA-binding domain-containing protein 2        | Biological Replicate 2 Only | 1                           |
| Q9BQG0     | Myb-binding protein 1A                                       | Biological Replicate 2 Only | 2                           |
| Q15773     | Myeloid leukemia factor 2                                    | Biological Replicate 2 Only | 1                           |
| P13349     | Myogenic factor 5                                            | Biological Replicate 2 Only | 1                           |
| P05976     | Myosin light chain 1/3, skeletal muscle isoform              | Biological Replicate 1 Only | 1                           |
| P08590     | Myosin light chain 3                                         | Biological Replicate 1 Only | 1                           |
| P60660     | Myosin light polypeptide 6                                   | Biological Replicate 2 Only | 1                           |
| P19105     | Myosin regulatory light chain 12A                            | Biological Replicate 2 Only | 1                           |
| P35579     | Myosin-10                                                    | Biological 1 and 2          | 7                           |
| P35580     | Myosin-11                                                    | Biological 1 and 2          | 6                           |
| Q7Z406     | Myosin-14                                                    | Biological 1 and 2          | 2                           |
| P35579     | Myosin-9                                                     | Biological 1 and 2          | 2                           |
| Q13423     | NAD                                                          | Biological Replicate 2 Only | 1                           |
| O00217     | NADH dehydrogenase                                           | Biological Replicate 2 Only | 1                           |
| O75380     | NADH dehydrogenase                                           | Biological Replicate 2 Only | 1                           |
| P17568     | NADH dehydrogenase                                           | Biological Replicate 1 Only | 1                           |
| P19404     | NADH dehydrogenase                                           | Biological Replicate 1 Only | 1                           |
| Q16718     | NADH dehydrogenase                                           | Biological 1 and 2          | 2                           |
| P00387     | NADH-cytochrome b5 reductase 3                               | Biological Replicate 2 Only | 1                           |
| P28331     | NADH-ubiquinone oxidoreductase 75 kDa subunit, mitochondrial | Biological Replicate 2 Only | 1                           |
| P41227     | N-alpha-acetyltransferase 10                                 | Biological Replicate 1 Only | 1                           |
| P41227     | N-alpha-acetyltransferase 10                                 | Biological Replicate 2 Only | 1                           |
| Q9BSU3     | N-alpha-acetyltransferase 11                                 | Biological Replicate 1 Only | 1                           |
| P15882     | N-chimaerin                                                  | Biological Replicate 2 Only | 1                           |
| P18615     | Negative elongation factor E                                 | Biological Replicate 2 Only | 1                           |
| Q8WXH0     | Nesprin-2                                                    | Biological Replicate 1 Only | 1                           |
| A2RRP1     | Neuroblastoma-amplified sequence                             | Biological Replicate 2 Only | 1                           |
| P12036     | Neurofilament heavy polypeptide                              | Biological Replicate 2 Only | 2                           |
| P07196     | Neurofilament light polypeptide                              | Biological 1 and 2          | 5                           |
| P07197     | Neurofilament medium polypeptide                             | Biological Replicate 2 Only | 1                           |

| Uniprot ID | Protein Name                                                      | Biological Replicate        | Number of Modified Peptides |
|------------|-------------------------------------------------------------------|-----------------------------|-----------------------------|
| P07197     | Neurofilament medium polypeptide                                  | Biological Replicate 2 Only | 2                           |
| Q04721     | Neurogenic locus notch homolog protein 2                          | Biological Replicate 2 Only | 1                           |
| Q8NEJ9     | Neuroguidin                                                       | Biological Replicate 1 Only | 1                           |
| O15240     | Neurosecretory protein VGF                                        | Biological Replicate 1 Only | 1                           |
| P55769     | NHP2-like protein 1                                               | Biological Replicate 2 Only | 1                           |
| Q969V3     | Nicalin                                                           | Biological Replicate 2 Only | 1                           |
| Q9Y314     | Nitric oxide synthase-interacting protein                         | Biological Replicate 2 Only | 1                           |
| Q15155     | Nodal modulator 1                                                 | Biological 1 and 2          | 2                           |
| Q5JPE7     | Nodal modulator 2                                                 | Biological 1 and 2          | 2                           |
| P69849     | Nodal modulator 3                                                 | Biological 1 and 2          | 2                           |
| Q15233     | Non-POU domain-containing octamer-binding protein                 | Biological Replicate 2 Only | 5                           |
| P46782     | Nuclear autoantigenic sperm protein                               | Biological 1 and 2          | 2                           |
| Q7Z417     | Nuclear fragile X mental retardation-interacting protein 2        | Biological Replicate 1 Only | 1                           |
| Q9Y266     | Nuclear migration protein nudC                                    | Biological Replicate 2 Only | 1                           |
| Q9HCD5     | Nuclear receptor coactivator 5                                    | Biological 1 and 2          | 3                           |
| Q9H1E3     | Nuclear ubiquitous casein and cyclin-dependent kinase substrate 1 | Biological Replicate 1 Only | 1                           |
| P67809     | Nuclease-sensitive element-binding protein 1                      | Biological Replicate 2 Only | 1                           |
| Q8WTT2     | Nucleolar complex protein 3 homolog                               | Biological Replicate 2 Only | 1                           |
| P78316     | Nucleolar protein 14                                              | Biological Replicate 2 Only | 1                           |
| Q9H6R4     | Nucleolar protein 6                                               | Biological Replicate 1 Only | 1                           |
| Q9NR30     | Nucleolar RNA helicase 2                                          | Biological Replicate 2 Only | 2                           |
| P17480     | Nucleolar transcription factor 1                                  | Biological Replicate 2 Only | 1                           |
| P19338     | Nucleolin                                                         | Biological Replicate 2 Only | 2                           |
| P31483     | Nucleolysin TIA-1 isoform p40                                     | Biological Replicate 2 Only | 1                           |
| Q01085     | Nucleolysin TIAR                                                  | Biological Replicate 2 Only | 1                           |
| P06748     | Nucleophosmin                                                     | Biological Replicate 2 Only | 3                           |
| Q7Z3B4     | Nucleoporin p54                                                   | Biological Replicate 2 Only | 1                           |
| Q9BVL2     | Nucleoporin p58/p45                                               | Biological Replicate 2 Only | 1                           |
| P12270     | Nucleoprotein TPR                                                 | Biological 1 and 2          | 4                           |
| P15531     | Nucleoside diphosphate kinase A                                   | Biological 1 and 2          | 3                           |
| P22392     | Nucleoside diphosphate kinase B                                   | Biological Replicate 2 Only | 1                           |

| Uniprot ID | Protein Name                                                        | Biological Replicate        | Number of Modified Peptides |
|------------|---------------------------------------------------------------------|-----------------------------|-----------------------------|
| P55209     | Nucleosome assembly protein 1-like 1                                | Biological Replicate 2 Only | 1                           |
| Q99733     | Nucleosome assembly protein 1-like 4                                | Biological Replicate 2 Only | 1                           |
| A1L443     | NUT family member 2F                                                | Biological Replicate 1 Only | 1                           |
| Q5VZR2     | NUT family member 2G                                                | Biological Replicate 1 Only | 1                           |
| Q9NX40     | OCIA domain-containing protein 1                                    | Biological Replicate 1 Only | 1                           |
| P04181     | Ornithine aminotransferase, mitochondrial                           | Biological Replicate 2 Only | 1                           |
| Q6GQQ9     | OTU domain-containing protein 7B                                    | Biological 1 and 2          | 2                           |
| Q9NX31     | Oxidative stress-responsive serine-rich protein 1                   | Biological Replicate 2 Only | 1                           |
| O75475     | PC4 and SFRS1-interacting protein                                   | Biological Replicate 2 Only | 2                           |
| O00151     | PDZ and LIM domain protein 1                                        | Biological Replicate 2 Only | 1                           |
| Q53GG5     | PDZ and LIM domain protein 3                                        | Biological Replicate 1 Only | 1                           |
| O14908     | PDZ domain-containing protein GIPC1                                 | Biological Replicate 2 Only | 1                           |
| Q96EY7     | Pentatricopeptide repeat domain-containing protein 3, mitochondrial | Biological Replicate 1 Only | 1                           |
| P62937     | Peptidyl-prolyl cis-trans isomerase A                               | Biological Replicate 2 Only | 3                           |
| P62937     | Peptidyl-prolyl cis-trans isomerase A                               | Biological Replicate 2 Only | 1                           |
| Q9Y536     | Peptidyl-prolyl cis-trans isomerase A-like 4A                       | Biological Replicate 2 Only | 1                           |
| P23284     | Peptidyl-prolyl cis-trans isomerase B                               | Biological Replicate 2 Only | 2                           |
| P30405     | Peptidyl-prolyl cis-trans isomerase F, mitochondrial                | Biological Replicate 2 Only | 1                           |
| Q00688     | Peptidyl-prolyl cis-trans isomerase FKBP3                           | Biological Replicate 2 Only | 1                           |
| Q13526     | Peptidyl-prolyl cis-trans isomerase NIMA-interacting 1              | Biological 1 and 2          | 2                           |
| Q9Y3C6     | Peptidyl-prolyl cis-trans isomerase-like 1                          | Biological Replicate 2 Only | 1                           |
| Q9Y3E5     | Peptidyl-tRNA hydrolase 2, mitochondrial                            | Biological Replicate 1 Only | 1                           |
| P41219     | Peripherin                                                          | Biological 1 and 2          | 2                           |
| Q8NEY8     | Periphilin-1                                                        | Biological Replicate 1 Only | 1                           |
| Q06830     | Peroxiredoxin-1                                                     | Biological 1 and 2          | 4                           |
| P30041     | Peroxiredoxin-6                                                     | Biological Replicate 2 Only | 2                           |
| Q9Y285     | Phenylalanine--tRNA ligase alpha subunit                            | Biological 1 and 2          | 3                           |
| Q8IZ21     | Phosphatase and actin regulator 4                                   | Biological Replicate 2 Only | 1                           |
| P48739     | Phosphatidylinositol transfer protein beta isoform                  | Biological Replicate 1 Only | 1                           |
| P00558     | Phosphoglycerate kinase 1                                           | Biological 1 and 2          | 4                           |
| P18669     | Phosphoglycerate mutase 1                                           | Biological 1 and 2          | 3                           |

| Uniprot ID | Protein Name                                          | Biological Replicate        | Number of Modified Peptides |
|------------|-------------------------------------------------------|-----------------------------|-----------------------------|
| O43520     | Phospholipid-transporting ATPase IC                   | Biological Replicate 2 Only | 1                           |
| O60423     | Phospholipid-transporting ATPase IK                   | Biological Replicate 1 Only | 1                           |
| O15067     | Phosphoribosylformylglycinamide synthase              | Biological Replicate 2 Only | 1                           |
| Q9H307     | Pinin                                                 | Biological Replicate 1 Only | 2                           |
| Q8NC51     | Plasminogen activator inhibitor 1 RNA-binding protein | Biological 1 and 2          | 2                           |
| P13796     | Plastin-2                                             | Biological Replicate 2 Only | 2                           |
| P13797     | Plastin-3                                             | Biological Replicate 2 Only | 2                           |
| P13797     | Plastin-3                                             | Biological Replicate 2 Only | 1                           |
| Q15149     | Plectin                                               | Biological Replicate 2 Only | 1                           |
| O43660     | Pleiotropic regulator 1                               | Biological Replicate 2 Only | 1                           |
| Q7Z3K3     | Pogo transposable element with ZNF domain             | Biological Replicate 2 Only | 1                           |
| P09874     | Poly [ADP-ribose] polymerase 1                        | Biological Replicate 2 Only | 2                           |
| Q15365     | Poly(rC)-binding protein 1                            | Biological Replicate 1 Only | 1                           |
| Q15365     | Poly(rC)-binding protein 1                            | Biological 1 and 2          | 5                           |
| Q15366     | Poly(rC)-binding protein 2                            | Biological 1 and 2          | 3                           |
| Q15366     | Poly(rC)-binding protein 2                            | Biological Replicate 2 Only | 1                           |
| P11940     | Polyadenylate-binding protein 1                       | Biological Replicate 2 Only | 5                           |
| P11940     | Polyadenylate-binding protein 1                       | Biological Replicate 1 Only | 1                           |
| Q4VXU2     | Polyadenylate-binding protein 1-like                  | Biological Replicate 2 Only | 1                           |
| Q9H361     | Polyadenylate-binding protein 3                       | Biological Replicate 2 Only | 4                           |
| Q13310     | Polyadenylate-binding protein 4                       | Biological Replicate 2 Only | 2                           |
| Q13310     | Polyadenylate-binding protein 4                       | Biological 1 and 2          | 3                           |
| Q9Y2S7     | Polymerase delta-interacting protein 2                | Biological Replicate 2 Only | 1                           |
| P26599     | Polypyrimidine tract-binding protein 1                | Biological 1 and 2          | 3                           |
| P20648     | Potassium-transporting ATPase alpha chain 1           | Biological Replicate 2 Only | 1                           |
| P54707     | Potassium-transporting ATPase alpha chain 2           | Biological Replicate 2 Only | 1                           |
| Q6S8J3     | POTE ankyrin domain family member E                   | Biological Replicate 1 Only | 1                           |
| A5A3E0     | POTE ankyrin domain family member F                   | Biological Replicate 1 Only | 1                           |
| P0CG38     | POTE ankyrin domain family member I                   | Biological Replicate 1 Only | 1                           |
| P0CG39     | POTE ankyrin domain family member J                   | Biological Replicate 1 Only | 1                           |
| P61011     | Prefoldin subunit 3                                   | Biological 1 and 2          | 3                           |



| Uniprot ID | Protein Name                                              | Biological Replicate        | Number of Modified Peptides |
|------------|-----------------------------------------------------------|-----------------------------|-----------------------------|
| P02545     | Prelamin-A/C                                              | Biological Replicate 2 Only | 3                           |
| Q9C0J8     | pre-mRNA 3' end processing protein WDR33                  | Biological 1 and 2          | 2                           |
| Q6UN15     | Pre-mRNA 3'-end-processing factor FIP1                    | Biological Replicate 2 Only | 1                           |
| O75400     | Pre-mRNA-processing factor 40 homolog A                   | Biological Replicate 1 Only | 1                           |
| Q6P2Q9     | Pre-mRNA-processing-splicing factor 8                     | Biological Replicate 2 Only | 3                           |
| Q99633     | Pre-mRNA-splicing factor 18                               | Biological Replicate 2 Only | 1                           |
| Q5VTL8     | Pre-mRNA-splicing factor 38B                              | Biological Replicate 2 Only | 1                           |
| O43143     | Pre-mRNA-splicing factor ATP-dependent RNA helicase DHX15 | Biological Replicate 2 Only | 1                           |
| O95391     | Pre-mRNA-splicing factor SLU7                             | Biological Replicate 1 Only | 1                           |
| O75934     | Pre-mRNA-splicing factor SPF27                            | Biological Replicate 1 Only | 1                           |
| Q5JRX3     | Presequence protease, mitochondrial                       | Biological Replicate 1 Only | 1                           |
| P58743     | Prestin                                                   | Biological Replicate 2 Only | 1                           |
| P45974     | Probable 28S rRNA                                         | Biological Replicate 2 Only | 1                           |
| Q7L014     | Probable ATP-dependent RNA helicase DDX46                 | Biological 1 and 2          | 2                           |
| P17844     | Probable ATP-dependent RNA helicase DDX5                  | Biological 1 and 2          | 4                           |
| P26196     | Probable ATP-dependent RNA helicase DDX6                  | Biological Replicate 2 Only | 1                           |
| Q5JPH6     | Probable glutamate--tRNA ligase, mitochondrial            | Biological Replicate 1 Only | 1                           |
| Q8N0Y7     | Probable phosphoglycerate mutase 4                        | Biological 1 and 2          | 3                           |
| Q9NPF4     | Probable tRNA N6-adenosine threonylcarbamoyltransferase   | Biological Replicate 2 Only | 1                           |
| Q8WUM4     | Programmed cell death 6-interacting protein               | Biological Replicate 1 Only | 1                           |
| Q9BUL8     | Programmed cell death protein 10                          | Biological Replicate 1 Only | 1                           |
| Q99623     | Prohibitin-2                                              | Biological Replicate 2 Only | 1                           |
| P12004     | Proliferating cell nuclear antigen                        | Biological 1 and 2          | 2                           |
| P46013     | Proliferation marker protein Ki-67                        | Biological Replicate 1 Only | 1                           |
| Q9UQ80     | Proliferation-associated protein 2G4                      | Biological Replicate 1 Only | 1                           |
| O43272     | Proline dehydrogenase 1, mitochondrial                    | Biological Replicate 1 Only | 1                           |
| Q32P28     | Prolyl 3-hydroxylase 1                                    | Biological 1 and 2          | 2                           |
| Q15185     | Prostaglandin E synthase 3                                | Biological 1 and 2          | 2                           |
| Q8N8N7     | Prostaglandin reductase 2                                 | Biological Replicate 2 Only | 1                           |
| Q06323     | Proteasome activator complex subunit 1                    | Biological Replicate 2 Only | 1                           |
| P61289     | Proteasome activator complex subunit 3                    | Biological Replicate 2 Only | 1                           |

| Uniprot ID | Protein Name                                                      | Biological Replicate        | Number of Modified Peptides |
|------------|-------------------------------------------------------------------|-----------------------------|-----------------------------|
| P49721     | Proteasome subunit beta type-2                                    | Biological Replicate 1 Only | 1                           |
| P28070     | Proteasome subunit beta type-4                                    | Biological Replicate 2 Only | 1                           |
| Q9NY61     | Protein AATF                                                      | Biological Replicate 2 Only | 2                           |
| Q9ULJ1     | Protein BCAP                                                      | Biological Replicate 1 Only | 1                           |
| P62324     | Protein BTG1                                                      | Biological Replicate 1 Only | 1                           |
| O60610     | Protein diaphanous homolog 1                                      | Biological Replicate 2 Only | 1                           |
| P07237     | Protein disulfide-isomerase                                       | Biological 1 and 2          | 2                           |
| P30101     | Protein disulfide-isomerase A3                                    | Biological Replicate 2 Only | 1                           |
| P13667     | Protein disulfide-isomerase A4                                    | Biological Replicate 2 Only | 2                           |
| Q15084     | Protein disulfide-isomerase A6                                    | Biological Replicate 1 Only | 1                           |
| Q52LJ0     | Protein FAM98B                                                    | Biological Replicate 1 Only | 1                           |
| Q92636     | Protein FAN                                                       | Biological Replicate 2 Only | 1                           |
| Q9UJC3     | Protein Hook homolog 1                                            | Biological Replicate 1 Only | 1                           |
| Q9UNF0     | Protein kinase C and casein kinase substrate in neurons protein 2 | Biological Replicate 2 Only | 1                           |
| P61326     | Protein mago nashi homolog                                        | Biological Replicate 2 Only | 1                           |
| Q96A72     | Protein mago nashi homolog 2                                      | Biological Replicate 2 Only | 1                           |
| Q92597     | Protein NDRG1                                                     | Biological Replicate 1 Only | 1                           |
| Q96TA1     | Protein Niban 2                                                   | Biological Replicate 1 Only | 1                           |
| Q13438     | Protein OS-9                                                      | Biological Replicate 2 Only | 1                           |
| O14974     | Protein phosphatase 1 regulatory subunit 12A                      | Biological Replicate 2 Only | 1                           |
| Q8WYL5     | Protein phosphatase Slingshot homolog 1                           | Biological Replicate 2 Only | 1                           |
| Q13123     | Protein Red                                                       | Biological Replicate 1 Only | 1                           |
| Q14690     | Protein RRP5 homolog                                              | Biological Replicate 2 Only | 1                           |
| P31949     | Protein S100-A11                                                  | Biological Replicate 2 Only | 1                           |
| P18583     | Protein SON                                                       | Biological 1 and 2          | 2                           |
| Q9H9S3     | Protein transport protein Sec61 subunit alpha isoform 2           | Biological Replicate 1 Only | 1                           |
| Q9H3U1     | Protein unc-45 homolog A                                          | Biological Replicate 2 Only | 1                           |
| Q8NE65     | Protein ZNF738                                                    | Biological Replicate 1 Only | 1                           |
| Q99497     | Protein/nucleic acid deglycase DJ-1                               | Biological Replicate 2 Only | 2                           |
| Q32M88     | Protein-glucosylgalactosylhydroxylysine glucosidase               | Biological Replicate 1 Only | 1                           |
| P20700     | Protein-L-isoaspartate                                            | Biological 1 and 2          | 5                           |

| Uniprot ID | Protein Name                                                            | Biological Replicate        | Number of Modified Peptides |
|------------|-------------------------------------------------------------------------|-----------------------------|-----------------------------|
| P04201     | Proto-oncogene Mas                                                      | Biological Replicate 1 Only | 1                           |
| Q9NQ39     | Putative 40S ribosomal protein S10-like                                 | Biological Replicate 2 Only | 2                           |
| Q9BYX7     | Putative beta-actin-like protein 3                                      | Biological Replicate 1 Only | 1                           |
| Q6NSW5     | Putative DENN domain-containing protein 10 B                            | Biological Replicate 2 Only | 1                           |
| Q5VTE0     | Putative elongation factor 1-alpha-like 3                               | Biological Replicate 2 Only | 4                           |
| P48741     | Putative heat shock 70 kDa protein 7                                    | Biological Replicate 2 Only | 2                           |
| Q58FG1     | Putative heat shock protein HSP 90-alpha A4                             | Biological Replicate 2 Only | 1                           |
| Q58FG1     | Putative heat shock protein HSP 90-alpha A4                             | Biological 1 and 2          | 2                           |
| Q6DN03     | Putative histone H2B type 2-C                                           | Biological Replicate 2 Only | 1                           |
| Q6DRA6     | Putative histone H2B type 2-D                                           | Biological Replicate 2 Only | 1                           |
| Q15486     | Putative inactive beta-glucuronidase-like protein SMA3                  | Biological Replicate 1 Only | 1                           |
| Q5SRD1     | Putative mitochondrial import inner membrane translocase subunit Tim23B | Biological Replicate 2 Only | 1                           |
| O60361     | Putative nucleoside diphosphate kinase                                  | Biological Replicate 2 Only | 1                           |
| Q8NFI4     | Putative protein FAM10A5                                                | Biological Replicate 2 Only | 1                           |
| A6NC97     | Putative protein FAM172B                                                | Biological Replicate 1 Only | 1                           |
| Q8N6K4     | Putative uncharacterized protein MGC34800                               | Biological Replicate 2 Only | 1                           |
| Q6P996     | Pyridoxal-dependent decarboxylase domain-containing protein 1           | Biological Replicate 1 Only | 1                           |
| Q9NVS9     | Pyridoxine-5'-phosphate oxidase                                         | Biological Replicate 1 Only | 1                           |
| P11177     | Pyruvate dehydrogenase E1 component subunit beta, mitochondrial         | Biological Replicate 2 Only | 2                           |
| P14618     | Pyruvate kinase PKM                                                     | Biological 1 and 2          | 5                           |
| P31150     | Rab GDP dissociation inhibitor alpha                                    | Biological Replicate 1 Only | 2                           |
| P50395     | Rab GDP dissociation inhibitor beta                                     | Biological Replicate 1 Only | 1                           |
| P50395     | Rab GDP dissociation inhibitor beta                                     | Biological Replicate 1 Only | 1                           |
| Q3YEC7     | Rab-like protein 6                                                      | Biological Replicate 1 Only | 1                           |
| P35241     | Radixin                                                                 | Biological Replicate 2 Only | 1                           |
| P43686     | Ran GTPase-activating protein 1                                         | Biological 1 and 2          | 4                           |
| Q9UHV5     | Rap guanine nucleotide exchange factor-like 1                           | Biological Replicate 1 Only | 1                           |
| P52306     | Rap1 GTPase-GDP dissociation stimulator 1                               | Biological Replicate 2 Only | 1                           |
| Q13283     | Ras GTPase-activating protein-binding protein 1                         | Biological 1 and 2          | 3                           |
| Q9UN86     | Ras GTPase-activating protein-binding protein 2                         | Biological Replicate 2 Only | 3                           |
| P63000     | Ras-related C3 botulinum toxin substrate 1                              | Biological Replicate 2 Only | 1                           |

| Uniprot ID | Protein Name                                  | Biological Replicate        | Number of Modified Peptides |
|------------|-----------------------------------------------|-----------------------------|-----------------------------|
| P57721     | Ras-related C3 botulinum toxin substrate 3    | Biological 1 and 2          | 3                           |
| P51149     | Ras-related protein Rab-7a                    | Biological Replicate 2 Only | 1                           |
| P62910     | Receptor of activated protein C kinase 1      | Biological 1 and 2          | 3                           |
| P18754     | Regulator of chromosome condensation          | Biological Replicate 1 Only | 2                           |
| O43566     | Regulator of G-protein signaling 14           | Biological Replicate 2 Only | 1                           |
| Q96DM3     | Regulator of MON1-CCZ1 complex                | Biological Replicate 2 Only | 1                           |
| Q15293     | Reticulocalbin-1                              | Biological Replicate 1 Only | 1                           |
| Q9NQC3     | Reticulon-4                                   | Biological Replicate 2 Only | 1                           |
| O75106     | Retina-specific copper amine oxidase          | Biological 1 and 2          | 2                           |
| Q9HB40     | Retinoid-inducible serine carboxypeptidase    | Biological Replicate 1 Only | 1                           |
| P52565     | Rho GDP-dissociation inhibitor 1              | Biological Replicate 1 Only | 1                           |
| Q14CB8     | Rho GTPase-activating protein 19              | Biological Replicate 2 Only | 1                           |
| Q5TG30     | Rho GTPase-activating protein 40              | Biological Replicate 1 Only | 1                           |
| Q12774     | Rho guanine nucleotide exchange factor 5      | Biological Replicate 1 Only | 1                           |
| P08134     | Rho-related GTP-binding protein RhoC          | Biological Replicate 1 Only | 1                           |
| P60891     | Ribose-phosphate pyrophosphokinase 1          | Biological Replicate 2 Only | 1                           |
| P11908     | Ribose-phosphate pyrophosphokinase 2          | Biological Replicate 2 Only | 1                           |
| Q9Y4W2     | Ribosomal biogenesis protein LAS1L            | Biological 1 and 2          | 2                           |
| Q9Y3A5     | Ribosome maturation protein SBDS              | Biological Replicate 2 Only | 1                           |
| Q96E11     | Ribosome-recycling factor, mitochondrial      | Biological Replicate 2 Only | 1                           |
| Q9C0B0     | RING finger protein unkempt homolog           | Biological Replicate 2 Only | 1                           |
| O43251     | RNA binding protein fox-1 homolog 2           | Biological Replicate 2 Only | 1                           |
| Q9H0A0     | RNA cytidine acetyltransferase                | Biological Replicate 2 Only | 1                           |
| Q8N7H5     | RNA polymerase II-associated factor 1 homolog | Biological Replicate 2 Only | 2                           |
| P38159     | RNA-binding motif protein, X chromosome       | Biological Replicate 1 Only | 1                           |
| O75526     | RNA-binding motif protein, X-linked-like-2    | Biological Replicate 1 Only | 1                           |
| P98175     | RNA-binding protein 10                        | Biological Replicate 2 Only | 1                           |
| Q96PK6     | RNA-binding protein 14                        | Biological Replicate 1 Only | 2                           |
| Q96T37     | RNA-binding protein 15                        | Biological Replicate 2 Only | 1                           |
| P49756     | RNA-binding protein 25                        | Biological Replicate 2 Only | 1                           |
| Q14498     | RNA-binding protein 39                        | Biological Replicate 2 Only | 1                           |

| Uniprot ID | Protein Name                                                | Biological Replicate        | Number of Modified Peptides |
|------------|-------------------------------------------------------------|-----------------------------|-----------------------------|
| Q9BWF3     | RNA-binding protein 4                                       | Biological 1 and 2          | 3                           |
| Q9BWF3     | RNA-binding protein 4                                       | Biological Replicate 1 Only | 1                           |
| Q9BQ04     | RNA-binding protein 4B                                      | Biological 1 and 2          | 3                           |
| P52756     | RNA-binding protein 5                                       | Biological Replicate 1 Only | 1                           |
| Q86SE5     | RNA-binding Raly-like protein                               | Biological Replicate 2 Only | 1                           |
| Q5JTH9     | RRP12-like protein                                          | Biological Replicate 2 Only | 1                           |
| Q9Y265     | RuvB-like 1                                                 | Biological 1 and 2          | 2                           |
| Q9Y230     | RuvB-like 2                                                 | Biological Replicate 2 Only | 1                           |
| A6NKF1     | SAC3 domain-containing protein 1                            | Biological Replicate 2 Only | 1                           |
| P31153     | S-adenosylmethionine synthase isoform type-2                | Biological Replicate 2 Only | 1                           |
| Q8WVM8     | Sec1 family domain-containing protein 1                     | Biological Replicate 2 Only | 1                           |
| O14641     | Segment polarity protein dishevelled homolog DVL-2          | Biological Replicate 2 Only | 2                           |
| Q96HI0     | Sentrin-specific protease 5                                 | Biological Replicate 2 Only | 1                           |
| P35270     | Sepiapterin reductase                                       | Biological Replicate 1 Only | 1                           |
| Q16181     | Septin-7                                                    | Biological Replicate 2 Only | 1                           |
| Q9UHD8     | Septin-9                                                    | Biological 1 and 2          | 2                           |
| P34897     | Serine hydroxymethyltransferase, mitochondrial              | Biological Replicate 2 Only | 2                           |
| Q8IYB3     | Serine/arginine repetitive matrix protein 1                 | Biological Replicate 2 Only | 1                           |
| Q9UQ35     | Serine/arginine repetitive matrix protein 2                 | Biological Replicate 2 Only | 1                           |
| A6NNA2     | Serine/arginine repetitive matrix protein 3                 | Biological Replicate 1 Only | 1                           |
| Q07955     | Serine/arginine-rich splicing factor 1                      | Biological 1 and 2          | 4                           |
| Q16629     | Serine/arginine-rich splicing factor 7                      | Biological 1 and 2          | 2                           |
| Q9BRL6     | Serine/arginine-rich splicing factor 8                      | Biological Replicate 1 Only | 1                           |
| Q13242     | Serine/arginine-rich splicing factor 9                      | Biological Replicate 1 Only | 1                           |
| Q9P289     | Serine/threonine-protein kinase 26                          | Biological Replicate 2 Only | 1                           |
| Q9Y5S2     | Serine/threonine-protein kinase MRCK beta                   | Biological Replicate 2 Only | 1                           |
| Q9BRS2     | Serine/threonine-protein kinase RIO1                        | Biological Replicate 2 Only | 1                           |
| Q9BVS4     | Serine/threonine-protein kinase RIO2                        | Biological Replicate 1 Only | 1                           |
| Q9NY27     | Serine/threonine-protein phosphatase 4 regulatory subunit 2 | Biological 1 and 2          | 2                           |
| P53041     | Serine/threonine-protein phosphatase 5                      | Biological Replicate 2 Only | 1                           |
| Q5H9R7     | Serine/threonine-protein phosphatase 6 regulatory subunit 3 | Biological Replicate 2 Only | 1                           |

| Uniprot ID | Protein Name                                                  | Biological Replicate        | Number of Modified Peptides |
|------------|---------------------------------------------------------------|-----------------------------|-----------------------------|
| P49591     | Serine--tRNA ligase, cytoplasmic                              | Biological Replicate 2 Only | 1                           |
| Q9BXP5     | Serrate RNA effector molecule homolog                         | Biological Replicate 2 Only | 3                           |
| P10768     | S-formylglutathione hydrolase                                 | Biological Replicate 1 Only | 1                           |
| Q9H299     | SH3 domain-binding glutamic acid-rich-like protein 3          | Biological Replicate 1 Only | 1                           |
| Q562F6     | Shugoshin 2                                                   | Biological Replicate 2 Only | 1                           |
| Q9NR45     | Sialic acid synthase                                          | Biological Replicate 1 Only | 1                           |
| P37108     | Signal recognition particle 14 kDa protein                    | Biological Replicate 1 Only | 1                           |
| P60842     | Signal recognition particle 54 kDa protein                    | Biological 1 and 2          | 4                           |
| P49458     | Signal recognition particle 9 kDa protein                     | Biological Replicate 2 Only | 2                           |
| P42224     | Signal transducer and activator of transcription 1-alpha/beta | Biological Replicate 1 Only | 1                           |
| Q04837     | Single-stranded DNA-binding protein, mitochondrial            | Biological 1 and 2          | 2                           |
| Q29RF7     | Sister chromatid cohesion protein PDS5 homolog A              | Biological Replicate 2 Only | 1                           |
| Q9UHP9     | Small muscular protein                                        | Biological Replicate 1 Only | 1                           |
| P62304     | Small nuclear ribonucleoprotein E                             | Biological Replicate 2 Only | 1                           |
| P62318     | Small nuclear ribonucleoprotein Sm D3                         | Biological Replicate 1 Only | 1                           |
| P63162     | Small nuclear ribonucleoprotein-associated protein N          | Biological Replicate 2 Only | 1                           |
| P14678     | Small nuclear ribonucleoprotein-associated proteins B and B'  | Biological Replicate 2 Only | 1                           |
| Q13573     | SNW domain-containing protein 1                               | Biological Replicate 1 Only | 1                           |
| Q9Y6M7     | Sodium bicarbonate cotransporter 3                            | Biological Replicate 1 Only | 1                           |
| P05023     | Sodium/potassium-transporting ATPase subunit alpha-1          | Biological 1 and 2          | 3                           |
| P05023     | Sodium/potassium-transporting ATPase subunit alpha-1          | Biological Replicate 2 Only | 1                           |
| P50991     | Sodium/potassium-transporting ATPase subunit alpha-2          | Biological 1 and 2          | 3                           |
| P13637     | Sodium/potassium-transporting ATPase subunit alpha-3          | Biological 1 and 2          | 3                           |
| Q13733     | Sodium/potassium-transporting ATPase subunit alpha-4          | Biological 1 and 2          | 3                           |
| P54709     | Sodium/potassium-transporting ATPase subunit beta-3           | Biological Replicate 2 Only | 1                           |
| Q8N695     | Sodium-coupled monocarboxylate transporter 1                  | Biological Replicate 1 Only | 1                           |
| Q86YT5     | Solute carrier family 13 member 5                             | Biological Replicate 2 Only | 1                           |
| Q07890     | Son of sevenless homolog 2                                    | Biological Replicate 1 Only | 1                           |
| O60493     | Sorting nexin-3                                               | Biological Replicate 2 Only | 1                           |
| Q13813     | Spectrin alpha chain, non-erythrocytic 1                      | Biological 1 and 2          | 5                           |
| P11277     | Spectrin beta chain, erythrocytic                             | Biological Replicate 2 Only | 1                           |

| Uniprot ID | Protein Name                                                | Biological Replicate        | Number of Modified Peptides |
|------------|-------------------------------------------------------------|-----------------------------|-----------------------------|
| Q01082     | Spectrin beta chain, non-erythrocytic 1                     | Biological Replicate 2 Only | 1                           |
| O15020     | Spectrin beta chain, non-erythrocytic 2                     | Biological Replicate 2 Only | 1                           |
| Q96SI9     | Spermatid perinuclear RNA-binding protein                   | Biological Replicate 2 Only | 1                           |
| P19623     | Spermidine synthase                                         | Biological Replicate 2 Only | 1                           |
| Q13838     | Spliceosome RNA helicase DDX39B                             | Biological Replicate 2 Only | 2                           |
| Q15637     | Splicing factor 1                                           | Biological Replicate 1 Only | 1                           |
| Q15459     | Splicing factor 3A subunit 1                                | Biological Replicate 2 Only | 1                           |
| Q15428     | Splicing factor 3A subunit 2                                | Biological Replicate 2 Only | 1                           |
| O75533     | Splicing factor 3B subunit 1                                | Biological Replicate 2 Only | 2                           |
| Q13435     | Splicing factor 3B subunit 2                                | Biological 1 and 2          | 2                           |
| Q15393     | Splicing factor 3B subunit 3                                | Biological Replicate 2 Only | 1                           |
| Q96I25     | Splicing factor 45                                          | Biological 1 and 2          | 3                           |
| P26368     | Splicing factor U2AF 65 kDa subunit                         | Biological 1 and 2          | 4                           |
| Q9BW85     | Splicing factor YJU2                                        | Biological Replicate 1 Only | 1                           |
| P23246     | Splicing factor, proline- and glutamine-rich                | Biological Replicate 2 Only | 1                           |
| Q12872     | Splicing factor, suppressor of white-apricot homolog        | Biological Replicate 1 Only | 1                           |
| Q8WXA9     | Splicing regulatory glutamine/lysine-rich protein 1         | Biological Replicate 1 Only | 1                           |
| Q9C0H9     | SRC kinase signaling inhibitor 1                            | Biological Replicate 1 Only | 1                           |
| Q96SB4     | SRSF protein kinase 1                                       | Biological Replicate 1 Only | 1                           |
| Q7KZF4     | Staphylococcal nuclease domain-containing protein 1         | Biological Replicate 2 Only | 1                           |
| Q15738     | Sterol-4-alpha-carboxylate 3-dehydrogenase, decarboxylating | Biological Replicate 2 Only | 1                           |
| Q9UJZ1     | Stomatin-like protein 2, mitochondrial                      | Biological 1 and 2          | 2                           |
| P35749     | Stress-70 protein, mitochondrial                            | Biological 1 and 2          | 2                           |
| P31948     | Stress-induced-phosphoprotein 1                             | Biological 1 and 2          | 2                           |
| Q9HCN8     | Stromal cell-derived factor 2-like protein 1                | Biological Replicate 1 Only | 1                           |
| Q14683     | Structural maintenance of chromosomes protein 1A            | Biological Replicate 1 Only | 2                           |
| O95347     | Structural maintenance of chromosomes protein 2             | Biological 1 and 2          | 2                           |
| Q9UQE7     | Structural maintenance of chromosomes protein 3             | Biological 1 and 2          | 3                           |
| Q6ZRP7     | Sulfhydryl oxidase 2                                        | Biological Replicate 1 Only | 1                           |
| Q9UBE0     | SUMO-activating enzyme subunit 1                            | Biological Replicate 2 Only | 1                           |
| Q9UBT2     | SUMO-activating enzyme subunit 2                            | Biological 1 and 2          | 2                           |

| Uniprot ID | Protein Name                                    | Biological Replicate        | Number of Modified Peptides |
|------------|-------------------------------------------------|-----------------------------|-----------------------------|
| P63279     | SUMO-conjugating enzyme UBC9                    | Biological Replicate 1 Only | 1                           |
| Q9UBS9     | SUN domain-containing ossification factor       | Biological Replicate 2 Only | 1                           |
| O14512     | Suppressor of cytokine signaling 7              | Biological Replicate 1 Only | 1                           |
| Q92922     | SWI/SNF complex subunit SMARCC1                 | Biological 1 and 2          | 2                           |
| Q8TAQ2     | SWI/SNF complex subunit SMARCC2                 | Biological 1 and 2          | 2                           |
| Q99536     | Synaptic vesicle membrane protein VAT-1 homolog | Biological Replicate 2 Only | 1                           |
| Q9HCH5     | Synaptotagmin-like protein 2                    | Biological 1 and 2          | 2                           |
| P34741     | Syndecan-2                                      | Biological Replicate 1 Only | 1                           |
| Q9Y490     | Talin-1                                         | Biological 1 and 2          | 2                           |
| Q4KMQ1     | Taperin                                         | Biological Replicate 2 Only | 1                           |
| P17987     | T-complex protein 1 subunit alpha               | Biological 1 and 2          | 5                           |
| P63267     | T-complex protein 1 subunit beta                | Biological 1 and 2          | 4                           |
| P50990     | T-complex protein 1 subunit delta               | Biological 1 and 2          | 2                           |
| P48643     | T-complex protein 1 subunit epsilon             | Biological Replicate 2 Only | 5                           |
| Q99832     | T-complex protein 1 subunit eta                 | Biological 1 and 2          | 5                           |
| P49327     | T-complex protein 1 subunit gamma               | Biological 1 and 2          | 5                           |
| P49411     | T-complex protein 1 subunit theta               | Biological 1 and 2          | 2                           |
| P38646     | T-complex protein 1 subunit zeta                | Biological 1 and 2          | 5                           |
| Q5JUR7     | Testis-expressed protein 30                     | Biological Replicate 2 Only | 1                           |
| P52888     | Thimet oligopeptidase                           | Biological Replicate 2 Only | 1                           |
| P10599     | Thioredoxin                                     | Biological Replicate 1 Only | 1                           |
| Q8NBS9     | Thioredoxin domain-containing protein 5         | Biological Replicate 2 Only | 1                           |
| Q16762     | Thiosulfate sulfurtransferase                   | Biological Replicate 2 Only | 1                           |
| Q86V81     | THO complex subunit 4                           | Biological Replicate 2 Only | 1                           |
| P26639     | Threonine--tRNA ligase, cytoplasmic             | Biological Replicate 2 Only | 1                           |
| Q6YHU6     | Thyroid adenoma-associated protein              | Biological Replicate 1 Only | 1                           |
| Q5JTV8     | Torsin-1A-interacting protein 1                 | Biological Replicate 2 Only | 1                           |
| Q8NFAQ8    | Torsin-1A-interacting protein 2                 | Biological Replicate 1 Only | 1                           |
| O14657     | Torsin-1B                                       | Biological Replicate 2 Only | 1                           |
| Q56UQ5     | TPT1-like protein                               | Biological Replicate 2 Only | 1                           |
| Q9H4I3     | TraB domain-containing protein                  | Biological Replicate 1 Only | 1                           |



| Uniprot ID | Protein Name                                                     | Biological Replicate        | Number of Modified Peptides |
|------------|------------------------------------------------------------------|-----------------------------|-----------------------------|
| P48553     | Trafficking protein particle complex subunit 10                  | Biological Replicate 1 Only | 1                           |
| Q8WVT3     | Trafficking protein particle complex subunit 12                  | Biological Replicate 2 Only | 1                           |
| P0DI82     | Trafficking protein particle complex subunit 2B                  | Biological Replicate 2 Only | 1                           |
| P37837     | Transaldolase                                                    | Biological Replicate 2 Only | 1                           |
| P20290     | Transcription factor BTF3                                        | Biological Replicate 2 Only | 1                           |
| Q9BQW3     | Transcription factor COE4                                        | Biological Replicate 1 Only | 1                           |
| P31629     | Transcription factor HIVEP2                                      | Biological Replicate 2 Only | 1                           |
| O00268     | Transcription initiation factor TFIID subunit 4                  | Biological 1 and 2          | 2                           |
| Q9HBM6     | Transcription initiation factor TFIID subunit 9B                 | Biological Replicate 2 Only | 1                           |
| Q13263     | Transcription intermediary factor 1-beta                         | Biological 1 and 2          | 3                           |
| P46937     | Transcriptional coactivator YAP1                                 | Biological Replicate 1 Only | 1                           |
| Q86YP4     | Transcriptional repressor p66-alpha                              | Biological Replicate 1 Only | 1                           |
| Q8WXI9     | Transcriptional repressor p66-beta                               | Biological 1 and 2          | 2                           |
| P62995     | Transformer-2 protein homolog beta                               | Biological Replicate 1 Only | 1                           |
| P61586     | Transforming protein RhoA                                        | Biological Replicate 1 Only | 1                           |
| P37802     | Transgelin-2                                                     | Biological Replicate 2 Only | 1                           |
| Q9HCF6     | Transient receptor potential cation channel subfamily M member 3 | Biological Replicate 2 Only | 1                           |
| P55060     | Transitional endoplasmic reticulum ATPase                        | Biological 1 and 2          | 2                           |
| P29401     | Transketolase                                                    | Biological Replicate 1 Only | 1                           |
| Q9BSH4     | Translational activator of cytochrome c oxidase 1                | Biological Replicate 2 Only | 1                           |
| P13693     | Translationally-controlled tumor protein                         | Biological Replicate 2 Only | 1                           |
| P49755     | Transmembrane emp24 domain-containing protein 10                 | Biological Replicate 2 Only | 1                           |
| Q5JRA6     | Transport and Golgi organization protein 1 homolog               | Biological Replicate 1 Only | 1                           |
| Q13428     | Treacle protein                                                  | Biological Replicate 1 Only | 1                           |
| P40939     | Trifunctional enzyme subunit alpha, mitochondrial                | Biological Replicate 2 Only | 1                           |
| P55084     | Trifunctional enzyme subunit beta, mitochondrial                 | Biological Replicate 2 Only | 3                           |
| P60174     | Triosephosphate isomerase                                        | Biological Replicate 2 Only | 1                           |
| Q08J23     | tRNA                                                             | Biological 1 and 2          | 3                           |
| Q7L0Y3     | tRNA methyltransferase 10 homolog C                              | Biological Replicate 2 Only | 1                           |
| Q9Y3I0     | tRNA-splicing ligase RtcB homolog                                | Biological 1 and 2          | 8                           |
| A6NFK2     | TRPM8 channel-associated factor 2                                | Biological Replicate 2 Only | 1                           |

| Uniprot ID | Protein Name                    | Biological Replicate        | Number of Modified Peptides |
|------------|---------------------------------|-----------------------------|-----------------------------|
| Q71U36     | Tubulin alpha-1A chain          | Biological 1 and 2          | 3                           |
| Q71U36     | Tubulin alpha-1A chain          | Biological Replicate 2 Only | 1                           |
| P68363     | Tubulin alpha-1B chain          | Biological Replicate 2 Only | 2                           |
| P68363     | Tubulin alpha-1B chain          | Biological Replicate 1 Only | 1                           |
| Q9BQE3     | Tubulin alpha-1C chain          | Biological 1 and 2          | 4                           |
| Q9BQE3     | Tubulin alpha-1C chain          | Biological Replicate 1 Only | 1                           |
| P0DPH8     | Tubulin alpha-3D chain          | Biological 1 and 2          | 3                           |
| Q6PEY2     | Tubulin alpha-3E chain          | Biological 1 and 2          | 2                           |
| P68366     | Tubulin alpha-4A chain          | Biological 1 and 2          | 2                           |
| Q9NY65     | Tubulin alpha-8 chain           | Biological 1 and 2          | 3                           |
| A6NNZ2     | Tubulin beta 8B                 | Biological 1 and 2          | 4                           |
| P07437     | Tubulin beta chain              | Biological 1 and 2          | 12                          |
| P07437     | Tubulin beta chain              | Biological Replicate 2 Only | 1                           |
| Q9H4B7     | Tubulin beta-1 chain            | Biological Replicate 2 Only | 2                           |
| Q9H4B7     | Tubulin beta-1 chain            | Biological Replicate 1 Only | 1                           |
| Q13885     | Tubulin beta-2A chain           | Biological 1 and 2          | 14                          |
| Q9BVA1     | Tubulin beta-2B chain           | Biological 1 and 2          | 14                          |
| Q13509     | Tubulin beta-3 chain            | Biological 1 and 2          | 6                           |
| Q13509     | Tubulin beta-3 chain            | Biological Replicate 2 Only | 2                           |
| P04350     | Tubulin beta-4A chain           | Biological 1 and 2          | 2                           |
| P04350     | Tubulin beta-4A chain           | Biological 1 and 2          | 10                          |
| P68371     | Tubulin beta-4B chain           | Biological 1 and 2          | 13                          |
| Q9BUF5     | Tubulin beta-6 chain            | Biological 1 and 2          | 5                           |
| Q3ZCM7     | Tubulin beta-8 chain            | Biological 1 and 2          | 5                           |
| P23258     | Tubulin gamma-1 chain           | Biological Replicate 2 Only | 3                           |
| Q9NRH3     | Tubulin gamma-2 chain           | Biological Replicate 2 Only | 2                           |
| O75347     | Tubulin-specific chaperone A    | Biological Replicate 1 Only | 1                           |
| Q9UBB9     | Tuftelin-interacting protein 11 | Biological Replicate 1 Only | 1                           |
| Q16890     | Tumor protein D53               | Biological Replicate 1 Only | 1                           |
| P07101     | Tyrosine 3-monooxygenase        | Biological Replicate 1 Only | 1                           |
| P17735     | Tyrosine aminotransferase       | Biological Replicate 2 Only | 1                           |

| Uniprot ID | Protein Name                                             | Biological Replicate        | Number of Modified Peptides |
|------------|----------------------------------------------------------|-----------------------------|-----------------------------|
| P35590     | Tyrosine-protein kinase receptor Tie-1                   | Biological Replicate 1 Only | 1                           |
| P50993     | Tyrosine--tRNA ligase, cytoplasmic                       | Biological 1 and 2          | 3                           |
| P08621     | U1 small nuclear ribonucleoprotein 70 kDa                | Biological Replicate 2 Only | 1                           |
| P09661     | U2 small nuclear ribonucleoprotein A'                    | Biological Replicate 2 Only | 1                           |
| O15042     | U2 snRNP-associated SURP motif-containing protein        | Biological 1 and 2          | 4                           |
| Q8WWY3     | U4/U6 small nuclear ribonucleoprotein Prp31              | Biological Replicate 1 Only | 1                           |
| O43290     | U4/U6.U5 tri-snRNP-associated protein 1                  | Biological Replicate 2 Only | 1                           |
| Q9NRR5     | Ubiquilin-4                                              | Biological Replicate 1 Only | 1                           |
| P54578     | Ubiquitin carboxyl-terminal hydrolase 14                 | Biological Replicate 1 Only | 1                           |
| P43243     | Ubiquitin carboxyl-terminal hydrolase 5                  | Biological Replicate 2 Only | 1                           |
| Q93009     | Ubiquitin carboxyl-terminal hydrolase 7                  | Biological Replicate 1 Only | 1                           |
| P09936     | Ubiquitin carboxyl-terminal hydrolase isozyme L1         | Biological Replicate 1 Only | 1                           |
| O14562     | Ubiquitin domain-containing protein UBFD1                | Biological Replicate 1 Only | 1                           |
| Q14157     | Ubiquitin-associated protein 2-like                      | Biological 1 and 2          | 2                           |
| Q13404     | Ubiquitin-conjugating enzyme E2 variant 1                | Biological Replicate 2 Only | 1                           |
| Q15819     | Ubiquitin-conjugating enzyme E2 variant 2                | Biological Replicate 2 Only | 1                           |
| Q15819     | Ubiquitin-conjugating enzyme E2 variant 2                | Biological Replicate 1 Only | 1                           |
| Q9H832     | Ubiquitin-conjugating enzyme E2 Z                        | Biological Replicate 2 Only | 1                           |
| P22314     | Ubiquitin-like modifier-activating enzyme 1              | Biological Replicate 2 Only | 1                           |
| A0AVT1     | Ubiquitin-like modifier-activating enzyme 6              | Biological Replicate 2 Only | 1                           |
| Q04323     | UBX domain-containing protein 1                          | Biological Replicate 1 Only | 1                           |
| Q9NYU2     | UDP-glucose:glycoprotein glucosyltransferase 1           | Biological Replicate 2 Only | 1                           |
| P30085     | UMP-CMP kinase                                           | Biological Replicate 2 Only | 1                           |
| A1L170     | Uncharacterized protein C1orf226                         | Biological Replicate 1 Only | 1                           |
| Q8WYQ4     | Uncharacterized protein C22orf15                         | Biological Replicate 1 Only | 1                           |
| Q9ULG3     | Uncharacterized protein KIAA1257                         | Biological Replicate 2 Only | 1                           |
| Q9ULV0     | Unconventional myosin-Vb                                 | Biological 1 and 2          | 2                           |
| Q5T230     | Undifferentiated embryonic cell transcription factor 1   | Biological Replicate 2 Only | 1                           |
| Q9HB07     | UPF0160 protein MYG1, mitochondrial                      | Biological Replicate 2 Only | 1                           |
| Q709C8     | Vacuolar protein sorting-associated protein 13C          | Biological Replicate 2 Only | 1                           |
| Q9NP79     | Vacuolar protein sorting-associated protein VTA1 homolog | Biological Replicate 2 Only | 1                           |

| Uniprot ID | Protein Name                                                   | Biological Replicate        | Number of Modified Peptides |
|------------|----------------------------------------------------------------|-----------------------------|-----------------------------|
| P50552     | Vasodilator-stimulated phosphoprotein                          | Biological Replicate 2 Only | 1                           |
| Q53GQ0     | Very-long-chain 3-oxoacyl-CoA reductase                        | Biological Replicate 2 Only | 1                           |
| Q9UEU0     | Vesicle transport through interaction with t-SNAREs homolog 1B | Biological Replicate 2 Only | 1                           |
| Q15836     | Vesicle-associated membrane protein 3                          | Biological Replicate 2 Only | 1                           |
| Q12907     | Vesicular integral-membrane protein VIP36                      | Biological Replicate 1 Only | 1                           |
| Q00341     | Vigilin                                                        | Biological Replicate 2 Only | 1                           |
| P08670     | Vimentin                                                       | Biological 1 and 2          | 10                          |
| P18206     | Vinculin                                                       | Biological 1 and 2          | 2                           |
| P21796     | Voltage-dependent anion-selective channel protein 1            | Biological Replicate 2 Only | 1                           |
| P38606     | V-type proton ATPase catalytic subunit A                       | Biological Replicate 2 Only | 2                           |
| P21281     | V-type proton ATPase subunit B, brain isoform                  | Biological Replicate 2 Only | 1                           |
| P15313     | V-type proton ATPase subunit B, kidney isoform                 | Biological Replicate 2 Only | 1                           |
| Q15904     | V-type proton ATPase subunit S1                                | Biological Replicate 1 Only | 1                           |
| Q5VU97     | VWFA and cache domain-containing protein 1                     | Biological Replicate 2 Only | 1                           |
| A6NGB9     | WAS/WASL-interacting protein family member 3                   | Biological Replicate 2 Only | 1                           |
| Q6UXN9     | WD repeat-containing protein 82                                | Biological Replicate 2 Only | 1                           |
| Q2TAY7     | WD40 repeat-containing protein SMU1                            | Biological Replicate 2 Only | 2                           |
| Q8TF30     | WH2 domain-containing protein 1                                | Biological Replicate 2 Only | 1                           |
| P13010     | X-ray repair cross-complementing protein 5                     | Biological Replicate 2 Only | 4                           |
| P12956     | X-ray repair cross-complementing protein 6                     | Biological Replicate 1 Only | 2                           |
| P16989     | Y-box-binding protein 3                                        | Biological Replicate 2 Only | 1                           |
| P49750     | YLP motif-containing protein 1                                 | Biological Replicate 2 Only | 1                           |
| Q6NZY4     | Zinc finger CCHC domain-containing protein 8                   | Biological Replicate 2 Only | 1                           |
| Q9UQR1     | Zinc finger protein 148                                        | Biological Replicate 2 Only | 1                           |
| P98182     | Zinc finger protein 200                                        | Biological Replicate 2 Only | 1                           |
| Q6N043     | Zinc finger protein 280D                                       | Biological Replicate 1 Only | 1                           |
| Q969S3     | Zinc finger protein 622                                        | Biological Replicate 2 Only | 1                           |
| Q96KR1     | Zinc finger RNA-binding protein                                | Biological Replicate 2 Only | 1                           |
| O14874     |                                                                | Biological Replicate 2 Only | 1                           |

**Table S6.** IV-FPOP oxidatively modified proteins in 200 mM H<sub>2</sub>O<sub>2</sub> PIXY  
IV-FPOP oxidatively modified proteins in 200 mM H<sub>2</sub>O<sub>2</sub> Flow<sup>24</sup>

| Uniprot ID | Protein Name                                                         | Biological Replicate        | Number of Modified Peptides |
|------------|----------------------------------------------------------------------|-----------------------------|-----------------------------|
| P41932     | 14-3-3-like protein 1                                                | Biological 1 and 2          | 2                           |
| Q20655     | 14-3-3-like protein 2                                                | Biological 1 and 2          | 2                           |
| G5EBH0     | 1-phosphatidylinositol 4,5-bisphosphate phosphodiesterase beta egl-8 | Biological Replicate 2 Only | 1                           |
| G5EFZ1     | 2,3-bisphosphoglycerate-independent phosphoglycerate mutase          | Biological 1 and 2          | 3                           |
| O76371     | 26S protease regulatory subunit 6A                                   | Biological 1 and 2          | 4                           |
| Q18115     | 26S proteasome non-ATPase regulatory subunit 1                       | Biological 1 and 2          | 2                           |
| O76577     | 26S proteasome non-ATPase regulatory subunit 14                      | Biological Replicate 2 Only | 1                           |
| Q04908     | 26S proteasome non-ATPase regulatory subunit 3                       | Biological 1 and 2          | 2                           |
| Q23449     | 26S proteasome non-ATPase regulatory subunit 8                       | Biological Replicate 2 Only | 2                           |
| Q09261     | 28S ribosomal protein S31, mitochondrial                             | Biological Replicate 1 Only | 1                           |
| Q8T8B9     | 2-amino-3-carboxymuconate-6-semialdehyde decarboxylase               | Biological Replicate 2 Only | 1                           |
| P36573     | 32 kDa beta-galactoside-binding lectin                               | Biological Replicate 2 Only | 1                           |
| Q19341     | 3-hydroxyanthranilate 3,4-dioxygenase                                | Biological Replicate 2 Only | 1                           |
| P51404     | 40S ribosomal protein S13                                            | Biological 1 and 2          | 6                           |
| P48150     | 40S ribosomal protein S14                                            | Biological Replicate 2 Only | 1                           |
| Q9XVP0     | 40S ribosomal protein S15                                            | Biological 1 and 2          | 2                           |
| O01692     | 40S ribosomal protein S17                                            | Biological 1 and 2          | 2                           |
| O18650     | 40S ribosomal protein S19                                            | Biological Replicate 2 Only | 1                           |
| P51403     | 40S ribosomal protein S2                                             | Biological 1 and 2          | 4                           |
| P49197     | 40S ribosomal protein S21                                            | Biological 1 and 2          | 4                           |
| P52821     | 40S ribosomal protein S25                                            | Biological 1 and 2          | 6                           |
| Q9TXP0     | 40S ribosomal protein S27                                            | Biological 1 and 2          | 2                           |
| P48152     | 40S ribosomal protein S3                                             | Biological 1 and 2          | 8                           |
| P48154     | 40S ribosomal protein S3a                                            | Biological Replicate 2 Only | 3                           |
| Q9N3X2     | 40S ribosomal protein S4                                             | Biological 1 and 2          | 4                           |
| P49041     | 40S ribosomal protein S5                                             | Biological Replicate 1 Only | 1                           |
| Q9NEN6     | 40S ribosomal protein S6                                             | Biological 1 and 2          | 4                           |

| Uniprot ID | Protein Name                                                         | Biological Replicate        | Number of Modified Peptides |
|------------|----------------------------------------------------------------------|-----------------------------|-----------------------------|
| P48156     | 40S ribosomal protein S8                                             | Biological 1 and 2          | 4                           |
| Q20228     | 40S ribosomal protein S9                                             | Biological 1 and 2          | 5                           |
| P46769     | 40S ribosomal protein SA                                             | Biological 1 and 2          | 5                           |
| Q22633     | 4-hydroxyphenylpyruvate dioxygenase                                  | Biological Replicate 2 Only | 1                           |
| P45894     | 5'-AMP-activated protein kinase catalytic subunit alpha-1            | Biological Replicate 2 Only | 2                           |
| Q95ZQ4     | 5'-AMP-activated protein kinase catalytic subunit alpha-2            | Biological Replicate 2 Only | 1                           |
| Q27274     | 60 kDa SS-A/Ro ribonucleoprotein homolog                             | Biological 1 and 2          | 2                           |
| Q93572     | 60S acidic ribosomal protein P0                                      | Biological Replicate 2 Only | 1                           |
| P91913     | 60S acidic ribosomal protein P1                                      | Biological 1 and 2          | 2                           |
| Q09533     | 60S ribosomal protein L10                                            | Biological 1 and 2          | 2                           |
| P91128     | 60S ribosomal protein L13                                            | Biological Replicate 2 Only | 1                           |
| Q27389     | 60S ribosomal protein L13a                                           | Biological Replicate 2 Only | 1                           |
| P91374     | 60S ribosomal protein L15                                            | Biological 1 and 2          | 2                           |
| Q9BL19     | 60S ribosomal protein L17                                            | Biological Replicate 2 Only | 1                           |
| O44480     | 60S ribosomal protein L18a                                           | Biological 1 and 2          | 4                           |
| O02639     | 60S ribosomal protein L19                                            | Biological 1 and 2          | 2                           |
| P34334     | 60S ribosomal protein L21                                            | Biological Replicate 2 Only | 1                           |
| P52819     | 60S ribosomal protein L22                                            | Biological Replicate 2 Only | 1                           |
| P48162     | 60S ribosomal protein L23a 1                                         | Biological 1 and 2          | 3                           |
| Q19869     | 60S ribosomal protein L26                                            | Biological Replicate 1 Only | 2                           |
| P50880     | 60S ribosomal protein L3                                             | Biological Replicate 2 Only | 3                           |
| O17570     | 60S ribosomal protein L38                                            | Biological Replicate 2 Only | 1                           |
| P52814     | 60S ribosomal protein L39                                            | Biological 1 and 2          | 2                           |
| O02056     | 60S ribosomal protein L4                                             | Biological 1 and 2          | 8                           |
| P49405     | 60S ribosomal protein L5                                             | Biological Replicate 2 Only | 1                           |
| O01802     | 60S ribosomal protein L7                                             | Biological Replicate 2 Only | 3                           |
| Q9XVF7     | 60S ribosomal protein L8                                             | Biological 1 and 2          | 3                           |
| Q17761     | 6-phosphogluconate dehydrogenase, decarboxylating                    | Biological Replicate 2 Only | 1                           |
| G5ECS8     | A disintegrin and metalloproteinase with thrombospondin motifs adt-1 | Biological Replicate 2 Only | 1                           |
| P34400     | Abnormal cell migration protein 10                                   | Biological Replicate 2 Only | 1                           |

| Uniprot ID | Protein Name                                                    | Biological Replicate        | Number of Modified Peptides |
|------------|-----------------------------------------------------------------|-----------------------------|-----------------------------|
| O45348     | Abnormal cell migration protein 18                              | Biological Replicate 2 Only | 1                           |
| A6ZJ71     | Abnormal cell migration protein 38                              | Biological 1 and 2          | 4                           |
| Q21166     | Acetoacetyl-CoA synthetase                                      | Biological Replicate 2 Only | 1                           |
| O62220     | Acidic leucine-rich nuclear phosphoprotein 32-related protein 1 | Biological Replicate 2 Only | 1                           |
| O01615     | Acidic leucine-rich nuclear phosphoprotein 32-related protein 2 | Biological Replicate 2 Only | 2                           |
| G5EBZ8     | Ack-related non-receptor tyrosine kinase                        | Biological Replicate 2 Only | 1                           |
| Q18008     | ACT1-like protein                                               | Biological 1 and 2          | 2                           |
| P0DM41     | Actin-1                                                         | Biological 1 and 2          | 7                           |
| Q07750     | Actin-depolymerizing factor 1, isoforms a/b                     | Biological Replicate 2 Only | 2                           |
| O01805     | Acyl-CoA-binding protein homolog 1                              | Biological Replicate 2 Only | 1                           |
| Q7YSI9     | Adapter protein unc-53                                          | Biological 1 and 2          | 2                           |
| P27604     | Adenosylhomocysteinase                                          | Biological 1 and 2          | 4                           |
| P34346     | Adenylate kinase                                                | Biological 1 and 2          | 4                           |
| Q20140     | Adenylate kinase isoenzyme 1                                    | Biological Replicate 2 Only | 1                           |
| P91134     | Adenylosuccinate synthetase                                     | Biological 1 and 2          | 3                           |
| Q10943     | ADP-ribosylation factor 1-like 2                                | Biological Replicate 2 Only | 2                           |
| O01541     | Alanine--tRNA ligase, cytoplasmic                               | Biological Replicate 2 Only | 2                           |
| Q23122     | Alanine--tRNA ligase, mitochondrial                             | Biological Replicate 2 Only | 1                           |
| Q17334     | Alcohol dehydrogenase 1                                         | Biological Replicate 2 Only | 1                           |
| O45218     | Alkyldihydroxyacetonephosphate synthase                         | Biological 1 and 2          | 3                           |
| O17554     | Alkylglycerol monooxygenase                                     | Biological 1 and 2          | 2                           |
| Q23192     | Alpha-tubulin N-acetyltransferase 2                             | Biological Replicate 1 Only | 1                           |
| G5EFT4     | Aminopeptidase Itah-1.1                                         | Biological 1 and 2          | 2                           |
| Q17405     | Aminopeptidase-like protein AC3.5                               | Biological Replicate 2 Only | 1                           |
| O18191     | Anaphase-promoting complex subunit 1                            | Biological Replicate 2 Only | 1                           |
| H2L2B8     | Anaphase-promoting complex subunit 10                           | Biological Replicate 2 Only | 1                           |
| A0A1C3NSL9 | Apical junction molecule                                        | Biological Replicate 2 Only | 1                           |
| P34552     | Apoptosis-linked gene 2-interacting protein X 1                 | Biological Replicate 2 Only | 2                           |
| Q19202     | Apyrase apy-1                                                   | Biological Replicate 2 Only | 1                           |
| Q21770     | Argonaute protein wago-1                                        | Biological Replicate 2 Only | 1                           |
| O44712     | Aryl hydrocarbon receptor protein 1                             | Biological Replicate 2 Only | 1                           |

| Uniprot ID | Protein Name                                                    | Biological Replicate        | Number of Modified Peptides |
|------------|-----------------------------------------------------------------|-----------------------------|-----------------------------|
| Q22067     | Aspartate aminotransferase, cytoplasmic                         | Biological 1 and 2          | 3                           |
| Q03577     | Aspartate--tRNA ligase, cytoplasmic                             | Biological 1 and 2          | 4                           |
| G5EEI4     | Aspartic protease 1                                             | Biological Replicate 2 Only | 1                           |
| P55956     | Aspartic protease 3                                             | Biological Replicate 2 Only | 1                           |
| Q21966     | Aspartic protease 4                                             | Biological Replicate 1 Only | 1                           |
| O01530     | Aspartic protease 6                                             | Biological 1 and 2          | 2                           |
| Q19087     | Aspartyl aminopeptidase                                         | Biological Replicate 2 Only | 1                           |
| Q9XXK1     | ATP synthase subunit alpha, mitochondrial                       | Biological 1 and 2          | 5                           |
| P46561     | ATP synthase subunit beta, mitochondrial                        | Biological 1 and 2          | 9                           |
| Q20748     | ATPase family AAA domain-containing protein 3                   | Biological 1 and 2          | 3                           |
| Q9TZL8     | ATP-dependent 6-phosphofructokinase 1                           | Biological Replicate 2 Only | 2                           |
| Q21489     | ATP-dependent DNA helicase chl-1                                | Biological Replicate 2 Only | 1                           |
| Q95YF3     | ATP-dependent RNA helicase cgh-1                                | Biological 1 and 2          | 3                           |
| P34689     | ATP-dependent RNA helicase glh-1                                | Biological Replicate 2 Only | 2                           |
| O01836     | ATP-dependent RNA helicase glh-3                                | Biological Replicate 2 Only | 1                           |
| D0PV95     | ATP-dependent RNA helicase laf-1                                | Biological 1 and 2          | 3                           |
| P34379     | Autophagy-related protein 13 homolog                            | Biological Replicate 2 Only | 1                           |
| O44739     | BAG family molecular chaperone regulator 1                      | Biological Replicate 2 Only | 1                           |
| Q19640     | Bardet-Biedl syndrome 2 protein homolog                         | Biological Replicate 2 Only | 1                           |
| Q06561     | Basement membrane proteoglycan                                  | Biological Replicate 2 Only | 1                           |
| O45435     | Bestrophin homolog 13                                           | Biological 1 and 2          | 3                           |
| Q22566     | Bestrophin homolog 17                                           | Biological Replicate 2 Only | 1                           |
| Q23369     | Bestrophin homolog 22                                           | Biological Replicate 2 Only | 1                           |
| Q94175     | Bestrophin homolog 9                                            | Biological Replicate 2 Only | 1                           |
| Q10663     | Bifunctional glyoxylate cycle protein                           | Biological Replicate 1 Only | 3                           |
| Q966W3     | Bifunctional heparan sulfate N-deacetylase/N-sulfotransferase 1 | Biological Replicate 2 Only | 1                           |
| O45679     | Bifunctional L-3-cyanoalanine synthase/cysteine synthase        | Biological Replicate 2 Only | 1                           |
| P54688     | Branched-chain-amino-acid aminotransferase, cytosolic           | Biological Replicate 2 Only | 1                           |
| Q9XUM6     | BTB and MATH domain-containing protein 34                       | Biological 1 and 2          | 2                           |
| O76612     | BTB and MATH domain-containing protein 47                       | Biological Replicate 2 Only | 2                           |



| Uniprot ID | Protein Name                                        | Biological Replicate        | Number of Modified Peptides |
|------------|-----------------------------------------------------|-----------------------------|-----------------------------|
| Q18990     | CAD protein                                         | Biological 1 and 2          | 10                          |
| P34616     | Cadherin-3                                          | Biological 1 and 2          | 2                           |
| Q19319     | Cadherin-4                                          | Biological Replicate 2 Only | 2                           |
| Q967F4     | Cadherin-related hmr-1                              | Biological Replicate 1 Only | 1                           |
| Q23658     | Calcium-dependent secretion activator               | Biological Replicate 1 Only | 1                           |
| O16305     | Calmodulin                                          | Biological Replicate 2 Only | 1                           |
| P27798     | Calreticulin                                        | Biological Replicate 2 Only | 1                           |
| P30625     | cAMP-dependent protein kinase regulatory subunit    | Biological Replicate 2 Only | 2                           |
| P42168     | Casein kinase I isoform alpha                       | Biological 1 and 2          | 4                           |
| P18334     | Casein kinase II subunit alpha                      | Biological 1 and 2          | 2                           |
| P43508     | Cathepsin B-like cysteine proteinase 4              | Biological Replicate 1 Only | 1                           |
| Q18879     | Caveolin-2                                          | Biological Replicate 1 Only | 1                           |
| Q09316     | CDK5RAP1-like protein                               | Biological Replicate 2 Only | 1                           |
| Q05062     | Cell division control protein 42 homolog            | Biological Replicate 2 Only | 1                           |
| G5EG38     | Cell division cycle protein 16 homolog              | Biological Replicate 2 Only | 1                           |
| O76360     | cGMP-dependent protein kinase egl-4                 | Biological Replicate 2 Only | 1                           |
| P50140     | Chaperonin homolog Hsp-60, mitochondrial            | Biological 1 and 2          | 13                          |
| P32756     | Choline O-acetyltransferase                         | Biological 1 and 2          | 2                           |
| P45895     | Chondroitin sulfate synthase mig-22                 | Biological Replicate 2 Only | 1                           |
| Q22516     | Chromodomain-helicase-DNA-binding protein 3 homolog | Biological 1 and 2          | 3                           |
| P48996     | Chromosome condensation protein dpy-27              | Biological Replicate 2 Only | 1                           |
| P34466     | Clustered mitochondria protein homolog              | Biological 1 and 2          | 2                           |
| Q09322     | Coelomocyte uptake defective protein 15             | Biological Replicate 2 Only | 1                           |
| P17139     | Collagen alpha-1(IV) chain                          | Biological 1 and 2          | 11                          |
| P17140     | Collagen alpha-2(IV) chain                          | Biological 1 and 2          | 5                           |
| G5EGE9     | Condensin complex subunit dpy-26                    | Biological Replicate 2 Only | 1                           |
| P34341     | Condensin-2 complex subunit kle-2                   | Biological Replicate 2 Only | 1                           |
| O01422     | COP9 signalosome complex subunit 2                  | Biological Replicate 1 Only | 1                           |
| Q95PZ0     | COP9 signalosome complex subunit 6                  | Biological 1 and 2          | 2                           |
| Q94261     | COP9/Signalosome and eIF3 complex-shared subunit 1  | Biological Replicate 2 Only | 2                           |
| Q09221     | Copine family protein 2                             | Biological 1 and 2          | 5                           |

| Uniprot ID | Protein Name                                                                                             | Biological Replicate        | Number of Modified Peptides |
|------------|----------------------------------------------------------------------------------------------------------|-----------------------------|-----------------------------|
| Q17423     | Crescerin-like protein che-12                                                                            | Biological 1 and 2          | 2                           |
| P34393     | C-type lectin domain-containing protein 160                                                              | Biological Replicate 2 Only | 1                           |
| G5ED41     | Cullin-associated NEDD8-dissociated protein 1                                                            | Biological Replicate 2 Only | 2                           |
| P34687     | Cuticle collagen 34                                                                                      | Biological 1 and 2          | 2                           |
| Q09455     | Cuticle collagen 39                                                                                      | Biological Replicate 2 Only | 1                           |
| Q09457     | Cuticle collagen bli-1                                                                                   | Biological Replicate 1 Only | 1                           |
| P91285     | Cuticle collagen dpy-5                                                                                   | Biological 1 and 2          | 3                           |
| Q23628     | Cuticle collagen lon-3                                                                                   | Biological Replicate 1 Only | 1                           |
| P20784     | Cuticle collagen rol-6                                                                                   | Biological Replicate 1 Only | 2                           |
| P46551     | Cyclin-dependent kinase 12                                                                               | Biological Replicate 2 Only | 1                           |
| P98080     | Cytochrome b-c1 complex subunit 1, mitochondrial                                                         | Biological 1 and 2          | 4                           |
| P24893     | Cytochrome c oxidase subunit 1                                                                           | Biological Replicate 2 Only | 1                           |
| Q19542     | Cytoplasmic dynein 2 heavy chain 1                                                                       | Biological Replicate 2 Only | 3                           |
| Q21106     | DDB1- and CUL4-associated factor homolog 1                                                               | Biological Replicate 1 Only | 1                           |
| Q22851     | Degenerin-like protein asic-2                                                                            | Biological Replicate 2 Only | 1                           |
| G5EGA5     | Delta(12) fatty acid desaturase fat-2                                                                    | Biological Replicate 2 Only | 1                           |
| G5EGN2     | Delta(9)-fatty-acid desaturase fat-6                                                                     | Biological 1 and 2          | 2                           |
| P41950     | Dendrite extension defective protein 1                                                                   | Biological Replicate 2 Only | 1                           |
| O17953     | Dihydrolipoyl dehydrogenase, mitochondrial                                                               | Biological Replicate 2 Only | 1                           |
| Q19749     | Dihydrolipoyllysine-residue acetyltransferase component of pyruvate dehydrogenase complex, mitochondrial | Biological 1 and 2          | 3                           |
| Q18164     | Dihydropyrimidine dehydrogenase [NADP(+)]                                                                | Biological 1 and 2          | 3                           |
| Q18253     | Dipeptidyl peptidase family member 2                                                                     | Biological 1 and 2          | 2                           |
| Q09568     | DIS3-like exonuclease 2                                                                                  | Biological Replicate 2 Only | 1                           |
| G5EFD5     | Disintegrin and metalloproteinase domain-containing protein unc-71                                       | Biological 1 and 2          | 2                           |
| G5ECY0     | Disks large homolog 1                                                                                    | Biological Replicate 2 Only | 1                           |
| Q18066     | Disorganized muscle protein 1                                                                            | Biological 1 and 2          | 4                           |
| Q21554     | DNA damage-binding protein 1                                                                             | Biological Replicate 1 Only | 1                           |
| A0FLQ6     | DNA polymerase theta                                                                                     | Biological Replicate 1 Only | 1                           |
| G5EG86     | DNA repair protein brc-2                                                                                 | Biological Replicate 2 Only | 1                           |

| Uniprot ID | Protein Name                                                                  | Biological Replicate        | Number of Modified Peptides |
|------------|-------------------------------------------------------------------------------|-----------------------------|-----------------------------|
| Q21902     | DNA replication licensing factor mcm-5                                        | Biological Replicate 2 Only | 1                           |
| O17966     | DNA topoisomerase 1                                                           | Biological 1 and 2          | 3                           |
| Q23670     | DNA topoisomerase 2 top-2                                                     | Biological 1 and 2          | 4                           |
| O61660     | DNA topoisomerase 3                                                           | Biological Replicate 1 Only | 1                           |
| P16356     | DNA-directed RNA polymerase II subunit RPB1                                   | Biological Replicate 2 Only | 1                           |
| Q10578     | DNA-directed RNA polymerase II subunit RPB2                                   | Biological Replicate 1 Only | 1                           |
| Q9N5K2     | DNA-directed RNA polymerases I, II, and III subunit RPABC1                    | Biological Replicate 2 Only | 1                           |
| Q9GR61     | DNA-directed RNA polymerases I, II, and III subunit RPABC5                    | Biological 1 and 2          | 2                           |
| Q8TA83     | DnaJ homolog dnj-10                                                           | Biological Replicate 1 Only | 1                           |
| Q17438     | DnaJ homolog subfamily B member 1                                             | Biological Replicate 2 Only | 1                           |
| P45971     | Dolichyl-diphosphooligosaccharide--protein glycosyltransferase 48 kDa subunit | Biological Replicate 1 Only | 1                           |
| Q9GZH4     | Dolichyl-diphosphooligosaccharide--protein glycosyltransferase subunit 1      | Biological Replicate 2 Only | 1                           |
| Q21307     | Dual specificity mitogen-activated protein kinase kinase mek-1                | Biological Replicate 2 Only | 1                           |
| Q10664     | Dual specificity mitogen-activated protein kinase kinase mek-2                | Biological Replicate 2 Only | 1                           |
| Q19020     | Dynein heavy chain, cytoplasmic                                               | Biological 1 and 2          | 10                          |
| Q9TW65     | Dystrophin-1                                                                  | Biological Replicate 2 Only | 1                           |
| Q94361     | E3 SUMO-protein ligase gei-17                                                 | Biological Replicate 1 Only | 1                           |
| Q09654     | E3 ubiquitin-protein ligase arc-1                                             | Biological Replicate 1 Only | 1                           |
| V6CLA2     | E3 ubiquitin-protein ligase hecd-1                                            | Biological Replicate 2 Only | 1                           |
| Q65XX2     | E3 ubiquitin-protein ligase listerin                                          | Biological Replicate 2 Only | 1                           |
| Q17750     | E3 UFM1-protein ligase 1 homolog                                              | Biological Replicate 2 Only | 2                           |
| P90755     | Ectonucleotide pyrophosphatase/phosphodiesterase C27A7.3                      | Biological 1 and 2          | 3                           |
| Q18892     | Ectopic P granules protein 5                                                  | Biological Replicate 2 Only | 1                           |
| Q11190     | Electron transfer flavoprotein-ubiquinone oxidoreductase, mitochondrial       | Biological 1 and 2          | 2                           |
| P53013     | Elongation factor 1-alpha                                                     | Biological 1 and 2          | 2                           |
| P29691     | Elongation factor 2                                                           | Biological 1 and 2          | 11                          |
| Q9XV52     | Elongation factor G, mitochondrial                                            | Biological Replicate 2 Only | 1                           |
| Q20819     | Elongation factor Ts, mitochondrial                                           | Biological Replicate 2 Only | 1                           |

| Uniprot ID | Protein Name                                                               | Biological Replicate        | Number of Modified Peptides |
|------------|----------------------------------------------------------------------------|-----------------------------|-----------------------------|
| O01971     | Emerin homolog 1                                                           | Biological Replicate 2 Only | 1                           |
| P20163     | Endoplasmic reticulum chaperone BiP homolog                                | Biological 1 and 2          | 4                           |
| Q22235     | Endoplasmin homolog                                                        | Biological 1 and 2          | 8                           |
| P91863     | Endoprotease aex-5                                                         | Biological Replicate 2 Only | 1                           |
| Q27527     | Enolase                                                                    | Biological 1 and 2          | 5                           |
| Q18169     | Esterase C25G4.2                                                           | Biological Replicate 2 Only | 1                           |
| P27639     | Eukaryotic initiation factor 4A                                            | Biological 1 and 2          | 3                           |
| O16520     | Eukaryotic peptide chain release factor subunit 1                          | Biological 1 and 2          | 3                           |
| D0Z5N4     | Eukaryotic translation initiation factor 2-alpha kinase gcn-2              | Biological 1 and 2          | 2                           |
| Q19192     | Eukaryotic translation initiation factor 2-alpha kinase pek-1              | Biological Replicate 2 Only | 1                           |
| P34339     | Eukaryotic translation initiation factor 3 subunit A                       | Biological 1 and 2          | 10                          |
| Q9XWI6     | Eukaryotic translation initiation factor 3 subunit B                       | Biological 1 and 2          | 3                           |
| P30642     | Eukaryotic translation initiation factor 3 subunit D                       | Biological 1 and 2          | 3                           |
| O61820     | Eukaryotic translation initiation factor 3 subunit E                       | Biological Replicate 2 Only | 1                           |
| Q18967     | Eukaryotic translation initiation factor 3 subunit F                       | Biological Replicate 2 Only | 2                           |
| Q19706     | Eukaryotic translation initiation factor 3 subunit G                       | Biological Replicate 2 Only | 1                           |
| O01974     | Eukaryotic translation initiation factor 3 subunit H                       | Biological Replicate 1 Only | 1                           |
| Q9XUP3     | Eukaryotic translation initiation factor 3 subunit K                       | Biological Replicate 2 Only | 2                           |
| Q95QW0     | Eukaryotic translation initiation factor 3 subunit L                       | Biological Replicate 2 Only | 1                           |
| Q9XW13     | Eukaryotic translation initiation factor 4E-binding protein Mextli homolog | Biological Replicate 2 Only | 1                           |
| P34563     | Eukaryotic translation initiation factor 5A-1                              | Biological Replicate 1 Only | 1                           |
| Q20751     | Eukaryotic translation initiation factor 5A-2                              | Biological Replicate 2 Only | 1                           |
| Q10901     | Excitatory amino acid transporter                                          | Biological Replicate 1 Only | 1                           |
| Q18406     | Exocyst complex component 5                                                | Biological Replicate 2 Only | 1                           |
| O01705     | Exostosin-2 homolog                                                        | Biological Replicate 2 Only | 1                           |
| Q9XTW2     | Extracellular serine/threonine protein kinase CeFam20                      | Biological Replicate 1 Only | 1                           |
| Q9N5R9     | FACT complex subunit spt-16                                                | Biological 1 and 2          | 3                           |
| P34686     | F-actin-capping protein subunit beta                                       | Biological Replicate 2 Only | 1                           |
| P90740     | Fanconi-associated nuclease 1 homolog                                      | Biological Replicate 2 Only | 1                           |
| Q20224     | Fatty acid-binding protein homolog 2                                       | Biological Replicate 2 Only | 1                           |

| Uniprot ID | Protein Name                                             | Biological Replicate        | Number of Modified Peptides |
|------------|----------------------------------------------------------|-----------------------------|-----------------------------|
| Q20222     | Fatty acid-binding protein homolog 3                     | Biological Replicate 2 Only | 1                           |
| O01812     | Fatty acid-binding protein homolog 6                     | Biological 1 and 2          | 4                           |
| P34382     | Fatty-acid and retinol-binding protein 1                 | Biological Replicate 1 Only | 1                           |
| O16299     | Fidgetin-like protein 1                                  | Biological Replicate 2 Only | 1                           |
| Q9TY03     | Frataxin, mitochondrial                                  | Biological 1 and 2          | 2                           |
| P54216     | Fructose-bisphosphate aldolase 1                         | Biological 1 and 2          | 4                           |
| P34638     | G2/mitotic-specific cyclin-A1                            | Biological Replicate 2 Only | 1                           |
| P91200     | Galactoside 2-alpha-L-fucosyltransferase                 | Biological 1 and 2          | 2                           |
| F3Y5P4     | Girdin homolog                                           | Biological Replicate 2 Only | 1                           |
| O44408     | GLH-binding kinase 1                                     | Biological Replicate 1 Only | 1                           |
| P30627     | Globin-like protein                                      | Biological Replicate 2 Only | 1                           |
| P34428     | Glutamine/asparagine-rich protein mdt-30                 | Biological Replicate 2 Only | 2                           |
| O02621     | Glutathione peroxidase 1                                 | Biological 1 and 2          | 2                           |
| Q9N4X8     | Glutathione S-transferase P 10                           | Biological Replicate 2 Only | 1                           |
| P17329     | Glyceraldehyde-3-phosphate dehydrogenase 2               | Biological 1 and 2          | 3                           |
| Q10039     | Glycine--tRNA ligase                                     | Biological 1 and 2          | 2                           |
| Q9U2Q9     | Glycogen synthase kinase-3                               | Biological Replicate 2 Only | 1                           |
| O16294     | GMP reductase                                            | Biological Replicate 1 Only | 1                           |
| P90970     | Golgin-84                                                | Biological 1 and 2          | 2                           |
| P34562     | GRIP and coiled-coil domain-containing protein 2         | Biological Replicate 2 Only | 1                           |
| O17915     | GTP-binding nuclear protein ran-1                        | Biological Replicate 2 Only | 1                           |
| Q19572     | Guanine nucleotide-binding protein alpha-12 subunit      | Biological 1 and 2          | 2                           |
| Q9XTB2     | Guanine nucleotide-binding protein alpha-13 subunit      | Biological Replicate 2 Only | 1                           |
| P22454     | Guanine nucleotide-binding protein alpha-2 subunit       | Biological Replicate 2 Only | 1                           |
| Q20701     | Guanine nucleotide-binding protein alpha-5 subunit       | Biological Replicate 2 Only | 1                           |
| Q20910     | Guanine nucleotide-binding protein alpha-9 subunit       | Biological Replicate 2 Only | 1                           |
| P51875     | Guanine nucleotide-binding protein G(o) subunit alpha    | Biological 1 and 2          | 2                           |
| P17343     | Guanine nucleotide-binding protein subunit beta-1        | Biological Replicate 2 Only | 1                           |
| Q21215     | Guanine nucleotide-binding protein subunit beta-2-like 1 | Biological Replicate 2 Only | 6                           |
| Q21086     | Guanine nucleotide-binding protein-like 3 homolog        | Biological 1 and 2          | 2                           |
| G5EBV6     | Guanyl-specific ribonuclease pgl-3                       | Biological Replicate 2 Only | 2                           |

| Uniprot ID | Protein Name                                                 | Biological Replicate        | Number of Modified Peptides |
|------------|--------------------------------------------------------------|-----------------------------|-----------------------------|
| Q09237     | GYF domain-containing protein C18H9.3                        | Biological Replicate 1 Only | 1                           |
| Q23495     | HEAT repeat-containing protein 1 homolog                     | Biological 1 and 2          | 3                           |
| P09446     | Heat shock 70 kDa protein A                                  | Biological 1 and 2          | 12                          |
| P27420     | Heat shock 70 kDa protein C                                  | Biological 1 and 2          | 6                           |
| P11141     | Heat shock 70 kDa protein F, mitochondrial                   | Biological 1 and 2          | 11                          |
| Q05036     | Heat shock protein 110                                       | Biological 1 and 2          | 7                           |
| Q18688     | Heat shock protein 90                                        | Biological 1 and 2          | 13                          |
| Q22037     | Heterogeneous nuclear ribonucleoprotein A1                   | Biological 1 and 2          | 3                           |
| Q20502     | Histidine ammonia-lyase                                      | Biological Replicate 2 Only | 1                           |
| P53795     | Histidine triad nucleotide-binding protein 1                 | Biological Replicate 2 Only | 1                           |
| P34183     | Histidine--tRNA ligase                                       | Biological Replicate 1 Only | 1                           |
| P15796     | Histone H1.2                                                 | Biological Replicate 2 Only | 1                           |
| P62784     | Histone H4                                                   | Biological 1 and 2          | 5                           |
| Q93352     | Homeobox protein ceh-36                                      | Biological Replicate 2 Only | 1                           |
| Q9BL02     | Homeobox protein cut-like ceh-44                             | Biological Replicate 2 Only | 1                           |
| Q09604     | Homeobox protein vab-15                                      | Biological Replicate 2 Only | 2                           |
| Q9Y041     | Homogentisate 1,2-dioxygenase                                | Biological Replicate 2 Only | 1                           |
| Q02328     | Huntington interacting protein related 1                     | Biological Replicate 2 Only | 3                           |
| O18023     | Ig-like and fibronectin type-III domain-containing protein 2 | Biological Replicate 2 Only | 1                           |
| Q18581     | Inactive angiotensin-converting enzyme-related protein       | Biological Replicate 1 Only | 1                           |
| O01767     | Inactive protein-tyrosine phosphatase egg-4                  | Biological Replicate 2 Only | 1                           |
| Q27295     | Innexin eat-5                                                | Biological Replicate 2 Only | 1                           |
| Q19746     | Innexin-3                                                    | Biological Replicate 2 Only | 1                           |
| Q23027     | Innexin-5                                                    | Biological Replicate 1 Only | 1                           |
| Q18680     | Inorganic pyrophosphatase 1                                  | Biological Replicate 2 Only | 1                           |
| Q9GZH3     | Inosine-5'-monophosphate dehydrogenase                       | Biological 1 and 2          | 2                           |
| P34370     | Inositol polyphosphate 5-phosphatase                         | Biological Replicate 1 Only | 1                           |
| P34446     | Integrin alpha pat-2                                         | Biological Replicate 1 Only | 1                           |
| Q27874     | Integrin beta pat-3                                          | Biological Replicate 1 Only | 1                           |
| Q10128     | Interleukin cytokine receptor-related protein 2              | Biological Replicate 1 Only | 1                           |
| P90901     | Intermediate filament protein ifa-1                          | Biological 1 and 2          | 2                           |

| Uniprot ID | Protein Name                                                                                               | Biological Replicate        | Number of Modified Peptides |
|------------|------------------------------------------------------------------------------------------------------------|-----------------------------|-----------------------------|
| O02365     | Intermediate filament protein ifa-2                                                                        | Biological 1 and 2          | 4                           |
| Q19289     | Intermediate filament protein ifb-1                                                                        | Biological Replicate 1 Only | 1                           |
| Q19286     | Intermediate filament protein ifb-2                                                                        | Biological 1 and 2          | 5                           |
| O45168     | Intermediate filament protein ifc-1                                                                        | Biological Replicate 2 Only | 1                           |
| Q21067     | Intermediate filament protein ifc-2                                                                        | Biological Replicate 2 Only | 1                           |
| Q86DC6     | Intermediate filament protein ifd-1                                                                        | Biological Replicate 1 Only | 1                           |
| Q09501     | Intermediate filament protein ifp-1                                                                        | Biological Replicate 2 Only | 1                           |
| G5EFW7     | Intraflagellar transport protein 122 homolog                                                               | Biological Replicate 2 Only | 1                           |
| Q0G838     | Intraflagellar transport protein 46 homolog                                                                | Biological Replicate 2 Only | 1                           |
| Q22830     | Intraflagellar transport protein osm-1                                                                     | Biological Replicate 2 Only | 1                           |
| Q21926     | Isoleucine--tRNA ligase, cytoplasmic                                                                       | Biological 1 and 2          | 4                           |
| P34540     | Kinesin heavy chain                                                                                        | Biological Replicate 2 Only | 2                           |
| P46822     | Kinesin light chain                                                                                        | Biological Replicate 2 Only | 1                           |
| P45962     | Kinesin-like protein klp-3                                                                                 | Biological Replicate 2 Only | 1                           |
| P34278     | Kinetochore null protein 1                                                                                 | Biological Replicate 2 Only | 1                           |
| Q21952     | Kinetochore protein Nuf2 homolog                                                                           | Biological Replicate 2 Only | 1                           |
| Q18026     | Kynureninase                                                                                               | Biological Replicate 2 Only | 2                           |
| Q21443     | Lamin-1                                                                                                    | Biological 1 and 2          | 3                           |
| Q18823     | Laminin-like protein lam-2                                                                                 | Biological 1 and 2          | 4                           |
| D5MCN2     | La-related protein 1                                                                                       | Biological Replicate 2 Only | 1                           |
| P34629     | Leucine aminopeptidase 1                                                                                   | Biological 1 and 2          | 3                           |
| Q9TZM3     | Leucine-rich repeat serine/threonine-protein kinase 1                                                      | Biological Replicate 2 Only | 1                           |
| Q09996     | Leucine--tRNA ligase                                                                                       | Biological Replicate 2 Only | 2                           |
| P34416     | LIM and SH3 domain protein F42H10.3                                                                        | Biological Replicate 2 Only | 1                           |
| G5EE86     | LIM/homeobox protein ttx-3                                                                                 | Biological Replicate 2 Only | 1                           |
| Q23571     | Lipoamide acyltransferase component of branched-chain alpha-keto acid dehydrogenase complex, mitochondrial | Biological Replicate 2 Only | 1                           |
| Q21049     | Liprin-alpha                                                                                               | Biological Replicate 2 Only | 1                           |
| O44952     | Lon protease homolog, mitochondrial                                                                        | Biological Replicate 2 Only | 1                           |
| Q95QK3     | Lysine-specific demethylase jmjd-3.1                                                                       | Biological Replicate 1 Only | 1                           |
| Q22099     | Lysine--tRNA ligase                                                                                        | Biological Replicate 2 Only | 3                           |

| Uniprot ID | Protein Name                                                                        | Biological Replicate        | Number of Modified Peptides |
|------------|-------------------------------------------------------------------------------------|-----------------------------|-----------------------------|
| P91193     | Macoilin                                                                            | Biological Replicate 1 Only | 1                           |
| P53018     | Major sperm protein 32                                                              | Biological 1 and 2          | 2                           |
| A3QMC8     | Mannose-1-phosphate guanyltransferase beta                                          | Biological Replicate 2 Only | 1                           |
| G5EGM1     | Matrix metalloproteinase-A                                                          | Biological Replicate 1 Only | 1                           |
| P34808     | Meiotic spindle formation protein mei-1                                             | Biological Replicate 2 Only | 1                           |
| O18209     | Membrane-associated tyrosine- and threonine-specific cdc2-inhibitory kinase wee-1.3 | Biological Replicate 2 Only | 1                           |
| Q09165     | Mesocentin                                                                          | Biological Replicate 1 Only | 1                           |
| Q9GYL2     | Metal transporter cnm-2                                                             | Biological Replicate 2 Only | 1                           |
| P90992     | Mitochondrial 2-oxoglutarate/malate carrier protein                                 | Biological Replicate 2 Only | 1                           |
| Q9Y0V6     | Mitochondrial import inner membrane translocase subunit Tim10                       | Biological Replicate 2 Only | 1                           |
| O45319     | Mitochondrial import inner membrane translocase subunit tim-13                      | Biological 1 and 2          | 2                           |
| P91454     | Mitochondrial import inner membrane translocase subunit TIM14                       | Biological Replicate 2 Only | 1                           |
| O17287     | Mitochondrial import receptor subunit TOM22 homolog                                 | Biological 1 and 2          | 3                           |
| Q02335     | Mitochondrial import receptor subunit tomm-70                                       | Biological Replicate 1 Only | 1                           |
| Q9BKU4     | Mitochondrial prohibitin complex protein 1                                          | Biological 1 and 2          | 4                           |
| P50093     | Mitochondrial prohibitin complex protein 2                                          | Biological Replicate 2 Only | 2                           |
| Q9XWH0     | Mitotic checkpoint protein bub-3                                                    | Biological Replicate 2 Only | 1                           |
| Q09591     | Mitotic chromosome and X-chromosome-associated protein mix-1                        | Biological Replicate 1 Only | 1                           |
| Q09412     | Molybdopterin synthase sulfur carrier subunit                                       | Biological Replicate 1 Only | 1                           |
| Q23223     | mRNA transport homolog 4                                                            | Biological Replicate 2 Only | 1                           |
| P34713     | Multidrug resistance protein pgp-3                                                  | Biological Replicate 1 Only | 1                           |
| O01761     | Muscle M-line assembly protein unc-89                                               | Biological Replicate 2 Only | 3                           |
| Q10656     | Myoblast growth factor receptor egl-15                                              | Biological Replicate 2 Only | 1                           |
| P19625     | Myosin regulatory light chain 1                                                     | Biological Replicate 2 Only | 2                           |
| P19626     | Myosin regulatory light chain 2                                                     | Biological Replicate 2 Only | 3                           |
| P53014     | Myosin, essential light chain                                                       | Biological 1 and 2          | 2                           |
| P02567     | Myosin-1                                                                            | Biological Replicate 2 Only | 6                           |



| Uniprot ID | Protein Name                                                 | Biological Replicate        | Number of Modified Peptides |
|------------|--------------------------------------------------------------|-----------------------------|-----------------------------|
| P12845     | Myosin-2                                                     | Biological 1 and 2          | 9                           |
| Q9XVI9     | Myosin-2 essential light chain                               | Biological Replicate 2 Only | 1                           |
| P12844     | Myosin-3                                                     | Biological 1 and 2          | 16                          |
| P02566     | Myosin-4                                                     | Biological 1 and 2          | 16                          |
| P90789     | NADH dehydrogenase [ubiquinone] 1 beta subcomplex subunit 7  | Biological Replicate 2 Only | 1                           |
| P24887     | NADH-ubiquinone oxidoreductase chain 1                       | Biological 1 and 2          | 2                           |
| P24896     | NADH-ubiquinone oxidoreductase chain 5                       | Biological Replicate 2 Only | 1                           |
| Q86S66     | Nascent polypeptide-associated complex subunit alpha         | Biological 1 and 2          | 4                           |
| O17972     | Nephrocystin-1-like protein                                  | Biological Replicate 2 Only | 1                           |
| Q9XXA7     | Neuferricin homolog                                          | Biological Replicate 2 Only | 1                           |
| P36609     | Neuronal calcium sensor 2                                    | Biological 1 and 2          | 4                           |
| Q09502     | Neuropeptide receptor 18                                     | Biological 1 and 2          | 2                           |
| Q21568     | NHP2-like protein 1 homolog                                  | Biological Replicate 2 Only | 1                           |
| Q9XUB9     | Nicotinic receptor-associated protein 1                      | Biological Replicate 2 Only | 1                           |
| Q21755     | Nitric oxide synthase-interacting protein homolog            | Biological Replicate 2 Only | 1                           |
| O76463     | Nitrilase and fragile histidine triad fusion protein NitFhit | Biological Replicate 1 Only | 1                           |
| G5EDP2     | Non-specific lipid-transfer protein-like 2                   | Biological Replicate 2 Only | 2                           |
| Q9N4M4     | Nuclear anchorage protein 1                                  | Biological 1 and 2          | 4                           |
| Q21878     | Nuclear hormone receptor family member nhr-1                 | Biological Replicate 1 Only | 1                           |
| O17082     | Nuclear hormone receptor family member nhr-125               | Biological 1 and 2          | 2                           |
| O01931     | Nuclear hormone receptor family member nhr-154               | Biological 1 and 2          | 2                           |
| O17930     | Nuclear hormone receptor family member nhr-268               | Biological Replicate 2 Only | 1                           |
| Q94407     | Nuclear hormone receptor family member nhr-48                | Biological Replicate 1 Only | 1                           |
| O16425     | Nuclear hormone receptor family member nhr-57                | Biological Replicate 1 Only | 1                           |
| G5EEH9     | Nuclear pore complex protein Nup98-Nup96                     | Biological Replicate 2 Only | 1                           |
| Q95QZ9     | Nuclear protein localization protein 4 homolog 2             | Biological Replicate 2 Only | 1                           |
| P91136     | Nucleolar complex protein 3 homolog                          | Biological Replicate 2 Only | 3                           |
| O44411     | Nucleolar GTP-binding protein 1                              | Biological 1 and 2          | 2                           |
| Q21276     | Nucleolar protein 56                                         | Biological 1 and 2          | 4                           |
| Q6BER5     | Nucleosome-remodeling factor subunit NURF301-like            | Biological Replicate 1 Only | 1                           |

| Uniprot ID | Protein Name                                                                                           | Biological Replicate        | Number of Modified Peptides |
|------------|--------------------------------------------------------------------------------------------------------|-----------------------------|-----------------------------|
| P91917     | Obg-like ATPase 1                                                                                      | Biological Replicate 2 Only | 2                           |
| O61790     | Orotate phosphoribosyltransferase                                                                      | Biological 1 and 2          | 2                           |
| P34266     | P granule abnormality protein 2                                                                        | Biological Replicate 2 Only | 2                           |
| A5JYW9     | Paired amphipathic helix protein sin-3                                                                 | Biological 1 and 2          | 2                           |
| O16785     | Paralyzed arrest at two-fold protein 6                                                                 | Biological 1 and 2          | 2                           |
| P10567     | Paramyosin                                                                                             | Biological 1 and 2          | 9                           |
| Q11186     | Patanin-like phospholipase domain-containing protein                                                   | Biological Replicate 2 Only | 1                           |
| Q966B0     | PAW domain-containing protein Y50D4B.3                                                                 | Biological Replicate 2 Only | 1                           |
| Q9TW67     | Peptide-N(4)-(N-acetyl-beta-glucosaminyl)asparagine amidase                                            | Biological 1 and 2          | 2                           |
| P52009     | Peptidyl-prolyl cis-trans isomerase 1                                                                  | Biological Replicate 2 Only | 1                           |
| P52011     | Peptidyl-prolyl cis-trans isomerase 3                                                                  | Biological Replicate 2 Only | 1                           |
| P52013     | Peptidyl-prolyl cis-trans isomerase 5                                                                  | Biological 1 and 2          | 4                           |
| P52014     | Peptidyl-prolyl cis-trans isomerase 6                                                                  | Biological Replicate 2 Only | 1                           |
| P52015     | Peptidyl-prolyl cis-trans isomerase 7                                                                  | Biological 1 and 2          | 2                           |
| P52016     | Peptidyl-prolyl cis-trans isomerase 8                                                                  | Biological Replicate 2 Only | 1                           |
| Q23490     | Peroxidase mlt-7                                                                                       | Biological 1 and 2          | 2                           |
| Q95Y89     | Pescadillo homolog                                                                                     | Biological Replicate 2 Only | 2                           |
| P90925     | Phenylalanine-4-hydroxylase                                                                            | Biological Replicate 2 Only | 1                           |
| Q19713     | Phenylalanine--tRNA ligase beta subunit                                                                | Biological Replicate 2 Only | 1                           |
| P40614     | Phosphate carrier protein, mitochondrial                                                               | Biological 1 and 2          | 4                           |
| O16264     | Phosphatidylethanolamine-binding protein homolog F40A3.3                                               | Biological Replicate 2 Only | 1                           |
| G5EE01     | Phosphatidylinositol 3,4,5-trisphosphate 3-phosphatase and dual-specificity protein phosphatase daf-18 | Biological Replicate 2 Only | 1                           |
| Q9TXI7     | Phosphatidylinositol 3-kinase catalytic subunit type 3                                                 | Biological Replicate 2 Only | 1                           |
| O17828     | piRNA biogenesis factor prde-1                                                                         | Biological Replicate 1 Only | 1                           |
| O61931     | Piwi-like protein ergo-1                                                                               | Biological 1 and 2          | 2                           |
| Q22943     | Platelet-activating factor acetylhydrolase homolog 2                                                   | Biological Replicate 2 Only | 1                           |
| Q9N4H4     | Poly [ADP-ribose] polymerase 1                                                                         | Biological Replicate 2 Only | 1                           |
| Q9TXQ1     | Poly [ADP-ribose] polymerase tankyrase                                                                 | Biological Replicate 2 Only | 1                           |
| O17087     | Poly(A) RNA polymerase gld-2                                                                           | Biological Replicate 1 Only | 1                           |
| Q9U1S7     | Polycystin-2                                                                                           | Biological Replicate 1 Only | 1                           |

| Uniprot ID | Protein Name                                                                      | Biological Replicate        | Number of Modified Peptides |
|------------|-----------------------------------------------------------------------------------|-----------------------------|-----------------------------|
| C7IVR4     | Polyglutamine-repeat protein pqn-41                                               | Biological Replicate 2 Only | 1                           |
| P34369     | Pre-mRNA-splicing factor 8 homolog                                                | Biological 1 and 2          | 3                           |
| Q22006     | Pre-rRNA-processing protein pro-1                                                 | Biological Replicate 2 Only | 1                           |
| P52166     | Presenilin sel-12                                                                 | Biological Replicate 2 Only | 1                           |
| Q01608     | Presenilin spe-4                                                                  | Biological Replicate 2 Only | 1                           |
| O17071     | Probable 26S proteasome regulatory subunit 10B                                    | Biological 1 and 2          | 3                           |
| O16368     | Probable 26S proteasome regulatory subunit 4                                      | Biological Replicate 2 Only | 1                           |
| Q20938     | Probable 26S proteasome regulatory subunit rpn-6.1                                | Biological Replicate 2 Only | 1                           |
| P34748     | Probable 28S ribosomal protein S23, mitochondrial                                 | Biological Replicate 2 Only | 1                           |
| Q23629     | Probable 2-oxoglutarate dehydrogenase E1 component DHKTD1 homolog, mitochondrial  | Biological Replicate 2 Only | 2                           |
| Q9N2V9     | Probable 3',5'-cyclic phosphodiesterase pde-6                                     | Biological Replicate 2 Only | 1                           |
| Q95Y71     | Probable 39S ribosomal protein L45, mitochondrial                                 | Biological Replicate 2 Only | 1                           |
| P41938     | Probable 3-hydroxyacyl-CoA dehydrogenase B0272.3                                  | Biological 1 and 2          | 3                           |
| Q9XTI0     | Probable 3-hydroxyisobutyrate dehydrogenase, mitochondrial                        | Biological 1 and 2          | 2                           |
| Q21217     | Probable 4-aminobutyrate aminotransferase, mitochondrial                          | Biological Replicate 2 Only | 2                           |
| Q960A1     | Probable aldehyde oxidase gad-3                                                   | Biological 1 and 2          | 2                           |
| P34479     | Probable amino acid transporter skat-1                                            | Biological Replicate 2 Only | 1                           |
| Q10454     | Probable arginine kinase F46H5.3                                                  | Biological 1 and 2          | 5                           |
| Q18803     | Probable ATP synthase subunit g 2, mitochondrial                                  | Biological Replicate 2 Only | 1                           |
| P53585     | Probable ATP-citrate synthase                                                     | Biological Replicate 2 Only | 2                           |
| Q9XWE9     | Probable ceramide synthase lagr-1                                                 | Biological Replicate 2 Only | 1                           |
| P34575     | Probable citrate synthase, mitochondrial                                          | Biological 1 and 2          | 3                           |
| P34574     | Probable clathrin heavy chain 1                                                   | Biological 1 and 2          | 3                           |
| Q20168     | Probable coatomer subunit beta'                                                   | Biological 1 and 2          | 3                           |
| Q22498     | Probable coatomer subunit gamma                                                   | Biological 1 and 2          | 2                           |
| Q23500     | Probable cytoplasmic aconitate hydratase                                          | Biological Replicate 2 Only | 1                           |
| P54889     | Probable delta-1-pyrroline-5-carboxylate synthase                                 | Biological Replicate 2 Only | 2                           |
| Q19196     | Probable DNA polymerase epsilon subunit 2                                         | Biological 1 and 2          | 2                           |
| P34669     | Probable dolichyl-diphosphooligosaccharide--protein glycosyltransferase subunit 3 | Biological Replicate 1 Only | 1                           |

| Uniprot ID | Protein Name                                                                  | Biological Replicate        | Number of Modified Peptides |
|------------|-------------------------------------------------------------------------------|-----------------------------|-----------------------------|
| Q93615     | Probable electron transfer flavoprotein subunit alpha, mitochondrial          | Biological Replicate 2 Only | 1                           |
| P34460     | Probable elongation factor 1-beta/1-delta 1                                   | Biological 1 and 2          | 3                           |
| Q9U2H9     | Probable elongation factor 1-beta/1-delta 2                                   | Biological 1 and 2          | 3                           |
| P54412     | Probable elongation factor 1-gamma                                            | Biological Replicate 1 Only | 2                           |
| P34559     | Probable enoyl-CoA hydratase, mitochondrial                                   | Biological Replicate 1 Only | 1                           |
| O17214     | Probable fumarate hydratase, mitochondrial                                    | Biological Replicate 2 Only | 1                           |
| Q09610     | Probable galaptin lec-8                                                       | Biological 1 and 2          | 2                           |
| Q19000     | Probable gamma-butyrobetaine dioxygenase                                      | Biological Replicate 1 Only | 1                           |
| P34497     | Probable glutamine synthetase                                                 | Biological Replicate 1 Only | 1                           |
| Q20772     | Probable glutaryl-CoA dehydrogenase, mitochondrial                            | Biological Replicate 2 Only | 1                           |
| P91252     | Probable glutathione S-transferase 6                                          | Biological Replicate 1 Only | 1                           |
| P91253     | Probable glutathione S-transferase 7                                          | Biological Replicate 2 Only | 1                           |
| Q09607     | Probable glutathione S-transferase gst-36                                     | Biological Replicate 2 Only | 1                           |
| Q22949     | Probable glycerol-3-phosphate acyltransferase, mitochondrial                  | Biological Replicate 2 Only | 1                           |
| P34517     | Probable glycerol-3-phosphate dehydrogenase 2                                 | Biological 1 and 2          | 2                           |
| P46548     | Probable glycylopeptide N-tetradecanoyltransferase                            | Biological 1 and 2          | 2                           |
| Q10907     | Probable G-protein coupled receptor AH9.4                                     | Biological Replicate 1 Only | 1                           |
| Q27484     | Probable histone H2B 3                                                        | Biological 1 and 2          | 2                           |
| Q93714     | Probable isocitrate dehydrogenase [NAD] subunit alpha, mitochondrial          | Biological 1 and 2          | 2                           |
| O02640     | Probable malate dehydrogenase, mitochondrial                                  | Biological Replicate 2 Only | 1                           |
| P90747     | Probable manganese-transporting ATPase catp-8                                 | Biological 1 and 2          | 2                           |
| P34650     | Probable mannose-6-phosphate isomerase                                        | Biological 1 and 2          | 2                           |
| Q09582     | Probable methionine synthase                                                  | Biological Replicate 2 Only | 1                           |
| P34385     | Probable methylcrotonoyl-CoA carboxylase beta chain, mitochondrial            | Biological Replicate 2 Only | 1                           |
| Q17693     | Probable methylenetetrahydrofolate reductase                                  | Biological Replicate 1 Only | 1                           |
| P52713     | Probable methylmalonate-semialdehyde dehydrogenase [acylating], mitochondrial | Biological Replicate 2 Only | 1                           |
| Q23381     | Probable methylmalonyl-CoA mutase, mitochondrial                              | Biological Replicate 2 Only | 1                           |

| Uniprot ID | Protein Name                                                                        | Biological Replicate        | Number of Modified Peptides |
|------------|-------------------------------------------------------------------------------------|-----------------------------|-----------------------------|
| O02161     | Probable mitochondrial import inner membrane translocase subunit tin-44             | Biological Replicate 2 Only | 2                           |
| Q20412     | Probable NADH dehydrogenase [ubiquinone] 1 beta subcomplex subunit 2, mitochondrial | Biological 1 and 2          | 2                           |
| Q93873     | Probable NADH dehydrogenase [ubiquinone] iron-sulfur protein 2, mitochondrial       | Biological 1 and 2          | 2                           |
| Q22619     | Probable NADH dehydrogenase [ubiquinone] iron-sulfur protein 8, mitochondrial       | Biological Replicate 2 Only | 1                           |
| Q18040     | Probable ornithine aminotransferase, mitochondrial                                  | Biological Replicate 2 Only | 1                           |
| P91427     | Probable phosphoglycerate kinase                                                    | Biological Replicate 2 Only | 2                           |
| O18054     | Probable prefoldin subunit 3                                                        | Biological 1 and 2          | 3                           |
| Q17435     | Probable prefoldin subunit 4                                                        | Biological Replicate 2 Only | 1                           |
| P52554     | Probable prefoldin subunit 6                                                        | Biological 1 and 2          | 3                           |
| P34498     | Probable pre-mRNA-splicing factor ATP-dependent RNA helicase mog-1                  | Biological Replicate 1 Only | 1                           |
| O45244     | Probable pre-mRNA-splicing factor ATP-dependent RNA helicase mog-4                  | Biological Replicate 2 Only | 1                           |
| P34329     | Probable protein disulfide-isomerase A4                                             | Biological Replicate 2 Only | 1                           |
| P49595     | Probable protein phosphatase 2C F42G9.1                                             | Biological Replicate 2 Only | 1                           |
| P52899     | Probable pyruvate dehydrogenase E1 component subunit alpha, mitochondrial           | Biological 1 and 2          | 5                           |
| Q19537     | Probable replication factor A 73 kDa subunit                                        | Biological Replicate 2 Only | 1                           |
| Q20496     | Probable rho GDP-dissociation inhibitor                                             | Biological 1 and 2          | 2                           |
| O17680     | Probable S-adenosylmethionine synthase 1                                            | Biological 1 and 2          | 3                           |
| P50306     | Probable S-adenosylmethionine synthase 4                                            | Biological Replicate 2 Only | 1                           |
| Q09543     | Probable serine/threonine-protein phosphatase PP2A regulatory subunit               | Biological Replicate 2 Only | 2                           |
| Q9XTU6     | Probable small nuclear ribonucleoprotein E                                          | Biological Replicate 1 Only | 1                           |
| Q9N4G9     | Probable small nuclear ribonucleoprotein G                                          | Biological Replicate 2 Only | 1                           |
| P91918     | Probable small nuclear ribonucleoprotein-associated protein B                       | Biological Replicate 1 Only | 1                           |
| Q18409     | Probable splicing factor, arginine/serine-rich 6                                    | Biological Replicate 1 Only | 1                           |

| Uniprot ID | Protein Name                                                           | Biological Replicate        | Number of Modified Peptides |
|------------|------------------------------------------------------------------------|-----------------------------|-----------------------------|
| Q09450     | Probable succinyl-CoA:3-ketoacid coenzyme A transferase, mitochondrial | Biological 1 and 2          | 6                           |
| P34604     | Probable translation initiation factor eIF-2B subunit alpha            | Biological 1 and 2          | 2                           |
| P80361     | Probable translation initiation factor eIF-2B subunit gamma            | Biological Replicate 2 Only | 1                           |
| P34477     | Probable ubiquitin-conjugating enzyme E2 7                             | Biological Replicate 1 Only | 1                           |
| Q17413     | Probable uridine-cytidine kinase                                       | Biological Replicate 1 Only | 1                           |
| Q9NAE2     | Probable urocanate hydratase                                           | Biological Replicate 2 Only | 1                           |
| Q9N5Y2     | Probable very-long-chain enoyl-CoA reductase art-1                     | Biological Replicate 1 Only | 1                           |
| Q21752     | Probable voltage-dependent anion-selective channel                     | Biological Replicate 2 Only | 5                           |
| P30628     | Probable V-type proton ATPase 116 kDa subunit a                        | Biological 1 and 2          | 3                           |
| Q19626     | Probable V-type proton ATPase subunit B                                | Biological 1 and 2          | 4                           |
| Q23680     | Probable V-type proton ATPase subunit F                                | Biological Replicate 2 Only | 1                           |
| Q22494     | Probable V-type proton ATPase subunit H 2                              | Biological 1 and 2          | 7                           |
| Q9XW16     | Profilin-1                                                             | Biological Replicate 2 Only | 1                           |
| Q20025     | Profilin-2                                                             | Biological 1 and 2          | 2                           |
| O45228     | Proline dehydrogenase 1, mitochondrial                                 | Biological Replicate 2 Only | 1                           |
| Q19842     | Propionyl-CoA carboxylase alpha chain, mitochondrial                   | Biological 1 and 2          | 8                           |
| O44156     | Proteasome subunit alpha type-1                                        | Biological Replicate 2 Only | 2                           |
| Q27488     | Proteasome subunit alpha type-2                                        | Biological Replicate 2 Only | 1                           |
| Q95008     | Proteasome subunit alpha type-5                                        | Biological 1 and 2          | 2                           |
| O17586     | Proteasome subunit alpha type-6                                        | Biological 1 and 2          | 2                           |
| Q95005     | Proteasome subunit alpha type-7                                        | Biological Replicate 2 Only | 1                           |
| Q23237     | Proteasome subunit beta type-3                                         | Biological 1 and 2          | 3                           |
| Q18610     | Protein abhd-3.2                                                       | Biological Replicate 2 Only | 1                           |
| Q9U2X0     | Protein arginine N-methyltransferase 1                                 | Biological Replicate 2 Only | 4                           |
| Q9XW42     | Protein arginine N-methyltransferase 7                                 | Biological Replicate 1 Only | 1                           |
| Q23402     | Protein BCCIP homolog                                                  | Biological 1 and 2          | 2                           |
| V6CJ04     | Protein bicaudal D homolog                                             | Biological 1 and 2          | 3                           |
| Q8IA98     | Protein CASP                                                           | Biological Replicate 2 Only | 1                           |
| W6RTA4     | Protein clarinet                                                       | Biological Replicate 2 Only | 1                           |
| Q03609     | Protein CLASP-3                                                        | Biological Replicate 2 Only | 1                           |

| Uniprot ID | Protein Name                                     | Biological Replicate        | Number of Modified Peptides |
|------------|--------------------------------------------------|-----------------------------|-----------------------------|
| A5JYX5     | Protein dhs-3                                    | Biological Replicate 2 Only | 2                           |
| Q17770     | Protein disulfide-isomerase 2                    | Biological 1 and 2          | 6                           |
| Q09263     | Protein EFR3 homolog                             | Biological Replicate 1 Only | 1                           |
| O44400     | Protein F37C4.5                                  | Biological Replicate 2 Only | 1                           |
| Q9XX47     | Protein fam-161                                  | Biological Replicate 2 Only | 1                           |
| O18282     | Protein FRG1 homolog                             | Biological Replicate 2 Only | 1                           |
| P34885     | Protein kinase C-like 1B                         | Biological Replicate 2 Only | 1                           |
| P34705     | Protein kup-1                                    | Biological 1 and 2          | 2                           |
| G5EBZ4     | Protein let-418                                  | Biological Replicate 2 Only | 1                           |
| Q27394     | Protein let-653                                  | Biological 1 and 2          | 2                           |
| Q27365     | Protein lin-15A                                  | Biological Replicate 2 Only | 1                           |
| Q27395     | Protein lin-15B                                  | Biological 1 and 2          | 2                           |
| Q18508     | Protein mel-28                                   | Biological 1 and 2          | 2                           |
| G5EBL2     | Protein mes-1                                    | Biological Replicate 1 Only | 2                           |
| G5EED4     | Protein nipi-3                                   | Biological 1 and 2          | 2                           |
| Q9XW10     | Protein pad-1                                    | Biological 1 and 2          | 3                           |
| Q95QA6     | Protein pat-12                                   | Biological 1 and 2          | 3                           |
| Q19775     | Protein phosphatase ppm-1.A                      | Biological Replicate 2 Only | 1                           |
| B7WN72     | Protein shank                                    | Biological Replicate 1 Only | 1                           |
| Q9N3X8     | Protein sidekick homolog                         | Biological Replicate 2 Only | 2                           |
| O62301     | Protein smg-8                                    | Biological Replicate 2 Only | 1                           |
| Q9XWJ1     | Protein smg-9                                    | Biological Replicate 2 Only | 1                           |
| Q18685     | Protein unc-112                                  | Biological Replicate 1 Only | 1                           |
| Q01630     | Protein unc-33                                   | Biological Replicate 2 Only | 1                           |
| Q9XV66     | Protein unc-80                                   | Biological Replicate 1 Only | 1                           |
| P37806     | Protein unc-87                                   | Biological 1 and 2          | 4                           |
| Q7YZW5     | Protein vem-1                                    | Biological Replicate 2 Only | 1                           |
| P41846     | Protein WBSCR14 homolog                          | Biological Replicate 2 Only | 1                           |
| Q4TT88     | Puromycin-sensitive aminopeptidase               | Biological Replicate 2 Only | 2                           |
| Q93425     | Putative 28S ribosomal protein S5, mitochondrial | Biological Replicate 2 Only | 1                           |
| O01513     | Putative 40S ribosomal protein S4-like           | Biological Replicate 1 Only | 1                           |

| Uniprot ID | Protein Name                                                    | Biological Replicate        | Number of Modified Peptides |
|------------|-----------------------------------------------------------------|-----------------------------|-----------------------------|
| P46562     | Putative aldehyde dehydrogenase family 7 member A1 homolog      | Biological Replicate 2 Only | 1                           |
| P49713     | Putative alpha-L-fucosidase                                     | Biological Replicate 2 Only | 1                           |
| Q27245     | Putative aminopeptidase W07G4.4                                 | Biological Replicate 2 Only | 1                           |
| Q22021     | Putative ATP synthase subunit f, mitochondrial                  | Biological Replicate 2 Only | 2                           |
| P34305     | Putative ATP-dependent RNA helicase rha-2                       | Biological Replicate 2 Only | 2                           |
| P34580     | Putative ATP-dependent RNA helicase T26G10.1                    | Biological 1 and 2          | 3                           |
| Q20781     | Putative carbonic anhydrase-like protein 1                      | Biological Replicate 1 Only | 1                           |
| P55216     | Putative cystathionine gamma-lyase 2                            | Biological 1 and 2          | 2                           |
| Q27515     | Putative cytochrome P450 CYP13A6                                | Biological Replicate 2 Only | 1                           |
| Q19264     | Putative deoxyribose-phosphate aldolase                         | Biological 1 and 2          | 3                           |
| Q93650     | Putative glutaminase 3                                          | Biological Replicate 1 Only | 1                           |
| O17919     | Putative H/ACA ribonucleoprotein complex subunit 4              | Biological Replicate 2 Only | 1                           |
| Q19317     | Putative neurobeachin homolog                                   | Biological 1 and 2          | 3                           |
| C0HKD7     | Putative peroxisomal biogenesis factor 10                       | Biological Replicate 1 Only | 1                           |
| O62146     | Putative phospholipase B-like 2                                 | Biological 1 and 2          | 2                           |
| Q9BL07     | Putative phospholipase B-like 3                                 | Biological 1 and 2          | 2                           |
| P34344     | Putative protein tag-250                                        | Biological Replicate 2 Only | 1                           |
| Q18846     | Putative ribosomal protein S6 kinase alpha-2                    | Biological 1 and 2          | 2                           |
| P34528     | Putative serine protease K12H4.7                                | Biological 1 and 2          | 3                           |
| Q17703     | Putative steroid dehydrogenase 1                                | Biological Replicate 2 Only | 1                           |
| O17730     | Putative thiosulfate sulfurtransferase mpst-1                   | Biological Replicate 2 Only | 1                           |
| Q9U2G0     | Putative U5 small nuclear ribonucleoprotein 200 kDa helicase    | Biological Replicate 2 Only | 3                           |
| Q10941     | Putative UDP-glucuronosyltransferase ugt-46                     | Biological Replicate 2 Only | 1                           |
| Q18081     | Putative UDP-glucuronosyltransferase ugt-48                     | Biological 1 and 2          | 2                           |
| Q22181     | Putative UDP-glucuronosyltransferase ugt-56                     | Biological Replicate 2 Only | 1                           |
| P50581     | Putative uncharacterized protein T27A8.3                        | Biological Replicate 2 Only | 1                           |
| Q10040     | Putative zinc protease C28F5.4                                  | Biological Replicate 2 Only | 2                           |
| O17732     | Pyruvate carboxylase 1                                          | Biological 1 and 2          | 3                           |
| O44451     | Pyruvate dehydrogenase E1 component subunit beta, mitochondrial | Biological Replicate 1 Only | 1                           |



| Uniprot ID | Protein Name                                              | Biological Replicate        | Number of Modified Peptides |
|------------|-----------------------------------------------------------|-----------------------------|-----------------------------|
| Q22366     | Rab-3-interacting molecule unc-10                         | Biological Replicate 2 Only | 1                           |
| Q07292     | Raf homolog serine/threonine-protein kinase               | Biological 1 and 2          | 2                           |
| G5EDB9     | Rap guanine nucleotide exchange factor                    | Biological 1 and 2          | 2                           |
| P34578     | Rap guanine nucleotide exchange factor 1                  | Biological Replicate 1 Only | 1                           |
| Q22720     | Ras GTPase-activating protein gap-1                       | Biological Replicate 2 Only | 2                           |
| P22981     | Ras protein let-60                                        | Biological Replicate 2 Only | 1                           |
| Q03206     | Ras-related protein ced-10                                | Biological Replicate 2 Only | 1                           |
| O01803     | Ras-related protein rab-11.1                              | Biological Replicate 2 Only | 1                           |
| Q23310     | Receptor-type guanylate cyclase gcy-14                    | Biological Replicate 2 Only | 1                           |
| X5M8U1     | Receptor-type guanylate cyclase gcy-17                    | Biological Replicate 2 Only | 1                           |
| G5EEE9     | Receptor-type guanylate cyclase gcy-23                    | Biological 1 and 2          | 4                           |
| A0A078BQP2 | Receptor-type guanylate cyclase gcy-25                    | Biological Replicate 1 Only | 1                           |
| Q23681     | Receptor-type guanylate cyclase gcy-4                     | Biological Replicate 1 Only | 1                           |
| Q23682     | Receptor-type guanylate cyclase gcy-5                     | Biological Replicate 2 Only | 1                           |
| N1NVB7     | Receptor-type guanylate cyclase gcy-6                     | Biological Replicate 2 Only | 1                           |
| E7EAU8     | Receptor-type guanylate cyclase gcy-9                     | Biological Replicate 2 Only | 1                           |
| G5EFV3     | Regulator of spindle assembly protein 2                   | Biological Replicate 2 Only | 1                           |
| Q93575     | Regulator of telomere elongation helicase 1 homolog       | Biological 1 and 2          | 3                           |
| P53016     | Replication factor C subunit 4                            | Biological Replicate 2 Only | 1                           |
| P92199     | Rho-associated protein kinase let-502                     | Biological Replicate 1 Only | 1                           |
| P42170     | Ribonucleoside-diphosphate reductase small chain          | Biological Replicate 2 Only | 1                           |
| Q18674     | Ribosomal RNA processing protein 1 homolog                | Biological Replicate 2 Only | 1                           |
| Q9XX15     | Ribosomal RNA small subunit methyltransferase nep-1       | Biological Replicate 2 Only | 1                           |
| P34524     | Ribosome biogenesis protein BRX1 homolog                  | Biological 1 and 2          | 3                           |
| Q9N3F0     | Ribosome production factor 2 homolog                      | Biological Replicate 2 Only | 1                           |
| Q95QG8     | RNA polymerase II subunit A C-terminal domain phosphatase | Biological Replicate 2 Only | 1                           |
| Q03560     | RNA polymerase-associated protein CTR9                    | Biological 1 and 2          | 2                           |
| G5EBY0     | RNA polymerase-associated protein RTF1 homolog            | Biological 1 and 2          | 3                           |
| Q09EF7     | Rootletin                                                 | Biological 1 and 2          | 3                           |
| Q22053     | rRNA 2'-O-methyltransferase fibrillar                     | Biological 1 and 2          | 4                           |
| O62251     | rRNA methyltransferase 2, mitochondrial                   | Biological Replicate 2 Only | 1                           |

| Uniprot ID | Protein Name                                                      | Biological Replicate        | Number of Modified Peptides |
|------------|-------------------------------------------------------------------|-----------------------------|-----------------------------|
| Q10121     | RutC family protein C23G10.2                                      | Biological Replicate 1 Only | 1                           |
| Q9GZH2     | RuvB-like 2                                                       | Biological Replicate 1 Only | 1                           |
| Q19469     | Serine/threonine kinase SAD-1                                     | Biological Replicate 2 Only | 1                           |
| P84199     | Serine/threonine-protein kinase D1044.8                           | Biological Replicate 2 Only | 1                           |
| O01583     | Serine/threonine-protein kinase mrck-1                            | Biological Replicate 2 Only | 2                           |
| Q9TW45     | Serine/threonine-protein kinase par-1                             | Biological Replicate 2 Only | 1                           |
| Q9GN62     | Serine/threonine-protein kinase par-4                             | Biological Replicate 1 Only | 1                           |
| O01510     | Serine/threonine-protein kinase smg-1                             | Biological Replicate 2 Only | 1                           |
| P46549     | Serine/threonine-protein kinase SULU                              | Biological Replicate 2 Only | 1                           |
| Q09499     | Serine/threonine-protein kinase/endoribonuclease ire-1            | Biological Replicate 2 Only | 1                           |
| G5EGK8     | Serine/threonine-protein phosphatase 2A catalytic subunit         | Biological 1 and 2          | 3                           |
| O18178     | Serine/threonine-protein phosphatase 2A regulatory subunit pptr-1 | Biological 1 and 2          | 2                           |
| O02217     | Serine/threonine-protein phosphatase 2A regulatory subunit rsa-1  | Biological Replicate 2 Only | 1                           |
| Q09422     | Serine/threonine-protein phosphatase Pgam5, mitochondrial         | Biological Replicate 2 Only | 1                           |
| Q09206     | Serpentine receptor class alpha-4                                 | Biological Replicate 2 Only | 1                           |
| Q20249     | Serpentine receptor class epsilon-8                               | Biological Replicate 2 Only | 1                           |
| P91535     | Serpentine receptor class gamma-20                                | Biological Replicate 2 Only | 1                           |
| P54127     | Serpentine receptor class gamma-5                                 | Biological 1 and 2          | 2                           |
| Q966L5     | Serrate RNA effector molecule homolog                             | Biological Replicate 2 Only | 1                           |
| Q9N4D6     | Sestrin homolog                                                   | Biological Replicate 2 Only | 1                           |
| Q09415     | SET domain-containing protein 14                                  | Biological Replicate 2 Only | 1                           |
| G5EFZ3     | Set1/Ash2 histone methyltransferase complex subunit ash-2         | Biological Replicate 2 Only | 1                           |
| G5EBL3     | Sex determination and dosage compensation protein sdc-2           | Biological Replicate 2 Only | 1                           |
| P34709     | Sex-determining transformer protein 2                             | Biological Replicate 2 Only | 1                           |
| O16927     | Signal recognition particle 14 kDa protein                        | Biological Replicate 1 Only | 1                           |
| O01498     | Signal transducing adapter molecule 1                             | Biological Replicate 2 Only | 1                           |
| Q17348     | Small nuclear ribonucleoprotein Sm D3                             | Biological Replicate 2 Only | 1                           |
| P34714     | SPARC                                                             | Biological Replicate 2 Only | 1                           |
| Q10579     | Spermatocyte protein spe-26                                       | Biological Replicate 2 Only | 1                           |

| Uniprot ID | Protein Name                                                                                                         | Biological Replicate        | Number of Modified Peptides |
|------------|----------------------------------------------------------------------------------------------------------------------|-----------------------------|-----------------------------|
| Q9XWS0     | Spindle and kinetochore-associated protein 1                                                                         | Biological Replicate 2 Only | 1                           |
| Q20010     | Spindle assembly abnormal protein 5                                                                                  | Biological Replicate 2 Only | 1                           |
| O62479     | Spindle assembly abnormal protein 6                                                                                  | Biological Replicate 1 Only | 1                           |
| P91870     | Spindle-defective protein 2                                                                                          | Biological Replicate 2 Only | 1                           |
| Q18212     | Spliceosome RNA helicase DDX39B homolog                                                                              | Biological Replicate 2 Only | 2                           |
| P90978     | Splicing factor U2AF 65 kDa subunit                                                                                  | Biological Replicate 2 Only | 2                           |
| Q8WQG9     | Stress-activated protein kinase jnk-1                                                                                | Biological Replicate 2 Only | 2                           |
| O16259     | Stress-induced-phosphoprotein 1                                                                                      | Biological Replicate 2 Only | 3                           |
| O01789     | Structural maintenance of chromosomes protein 1                                                                      | Biological 1 and 2          | 2                           |
| B2FDA8     | Structural maintenance of chromosomes protein 3                                                                      | Biological Replicate 1 Only | 1                           |
| G5EG17     | Structural maintenance of chromosomes protein 6 homolog smc-6                                                        | Biological Replicate 1 Only | 1                           |
| Q09508     | Succinate dehydrogenase [ubiquinone] flavoprotein subunit, mitochondrial                                             | Biological Replicate 2 Only | 1                           |
| Q09545     | Succinate dehydrogenase [ubiquinone] iron-sulfur subunit, mitochondrial                                              | Biological Replicate 2 Only | 1                           |
| P53588     | Succinate--CoA ligase [ADP-forming] subunit beta, mitochondrial                                                      | Biological Replicate 2 Only | 1                           |
| P53589     | Succinate--CoA ligase [GDP-forming] subunit beta, mitochondrial                                                      | Biological 1 and 2          | 5                           |
| Q94225     | Sulfate permease family protein 3                                                                                    | Biological Replicate 2 Only | 1                           |
| P34697     | Superoxide dismutase [Cu-Zn]                                                                                         | Biological Replicate 2 Only | 1                           |
| Q93212     | Suppressor of lurcher protein 1                                                                                      | Biological 1 and 2          | 2                           |
| Q10122     | Suppressor of organelle fusion 2                                                                                     | Biological 1 and 2          | 2                           |
| O17582     | Suppressor of presenilin protein 4                                                                                   | Biological Replicate 1 Only | 1                           |
| G5EDG2     | SWI/SNF-related matrix-associated actin-dependent regulator of chromatin subfamily A containing DEAD/H box 1 homolog | Biological Replicate 2 Only | 1                           |
| G5ECL2     | Synaptojanin                                                                                                         | Biological Replicate 2 Only | 1                           |
| P34693     | Synaptotagmin-1                                                                                                      | Biological Replicate 2 Only | 1                           |
| Q9GSX9     | Synembryn                                                                                                            | Biological Replicate 2 Only | 1                           |
| Q93646     | Syntrophin-1                                                                                                         | Biological Replicate 2 Only | 1                           |
| Q9GZC8     | Systemic RNA interference defective protein 1                                                                        | Biological Replicate 2 Only | 1                           |

| Uniprot ID | Protein Name                                             | Biological Replicate        | Number of Modified Peptides |
|------------|----------------------------------------------------------|-----------------------------|-----------------------------|
| P41988     | T-complex protein 1 subunit alpha                        | Biological 1 and 2          | 4                           |
| P47207     | T-complex protein 1 subunit beta                         | Biological 1 and 2          | 4                           |
| P47208     | T-complex protein 1 subunit delta                        | Biological 1 and 2          | 3                           |
| P47209     | T-complex protein 1 subunit epsilon                      | Biological Replicate 2 Only | 3                           |
| Q9N4J8     | T-complex protein 1 subunit gamma                        | Biological Replicate 2 Only | 3                           |
| Q9N358     | T-complex protein 1 subunit theta                        | Biological 1 and 2          | 7                           |
| P46550     | T-complex protein 1 subunit zeta                         | Biological 1 and 2          | 7                           |
| Q95YE9     | Telomere length regulation protein clk-2                 | Biological 1 and 2          | 2                           |
| G5EGQ6     | Teneurin-1                                               | Biological 1 and 2          | 2                           |
| G5EEM6     | TGF-beta-activated kinase 1 and MAP3K7-binding protein 1 | Biological Replicate 2 Only | 1                           |
| Q18484     | Thioredoxin-related transmembrane protein 2 homolog      | Biological Replicate 2 Only | 1                           |
| P52709     | Threonine--tRNA ligase, cytoplasmic                      | Biological 1 and 2          | 5                           |
| O17389     | Thymosin beta                                            | Biological Replicate 2 Only | 1                           |
| G4SLH0     | Titin homolog                                            | Biological 1 and 2          | 4                           |
| Q18885     | Transcription factor BTF3 homolog                        | Biological Replicate 2 Only | 1                           |
| P28515     | Transcription factor elt-1                               | Biological Replicate 2 Only | 1                           |
| G5EGM3     | Transcription initiation factor TFIID subunit 1          | Biological Replicate 2 Only | 1                           |
| G5EEV2     | Transcription-associated protein 1                       | Biological Replicate 2 Only | 2                           |
| Q93971     | Transient receptor potential channel                     | Biological Replicate 2 Only | 1                           |
| P54811     | Transitional endoplasmic reticulum ATPase homolog 1      | Biological 1 and 2          | 10                          |
| P54812     | Transitional endoplasmic reticulum ATPase homolog 2      | Biological 1 and 2          | 13                          |
| Q93573     | Translationally-controlled tumor protein homolog         | Biological 1 and 2          | 5                           |
| Q11080     | Transmembrane BAX inhibitor motif-containing protein 4   | Biological Replicate 2 Only | 1                           |
| D3KZG3     | Transmembrane channel-like protein 1                     | Biological Replicate 2 Only | 1                           |
| Q20687     | Transmembrane protein 237 homolog                        | Biological Replicate 1 Only | 1                           |
| Q22288     | Transthyretin-like protein 15                            | Biological Replicate 2 Only | 1                           |
| Q10657     | Triosephosphate isomerase                                | Biological Replicate 2 Only | 1                           |
| Q09541     | Tripeptidyl-peptidase 2                                  | Biological Replicate 2 Only | 1                           |
| Q22866     | Tropomyosin isoforms a/b/d/f                             | Biological 1 and 2          | 9                           |
| Q27249     | Tropomyosin isoforms c/e                                 | Biological 1 and 2          | 5                           |
| Q9GYF1     | Troponin I 2                                             | Biological Replicate 2 Only | 1                           |

| Uniprot ID | Protein Name                                                     | Biological Replicate        | Number of Modified Peptides |
|------------|------------------------------------------------------------------|-----------------------------|-----------------------------|
| P34690     | Tubulin alpha-2 chain                                            | Biological 1 and 2          | 4                           |
| P91910     | Tubulin alpha-3 chain                                            | Biological 1 and 2          | 3                           |
| P52274     | Tubulin alpha-8 chain                                            | Biological Replicate 2 Only | 1                           |
| P12456     | Tubulin beta-1 chain                                             | Biological 1 and 2          | 7                           |
| P52275     | Tubulin beta-2 chain                                             | Biological 1 and 2          | 16                          |
| P41937     | Tubulin beta-4 chain                                             | Biological Replicate 2 Only | 7                           |
| Q09647     | Tubulin polyglutamylase ttl-4                                    | Biological Replicate 1 Only | 1                           |
| P91127     | Tubulin polymerization-promoting protein homolog                 | Biological Replicate 2 Only | 1                           |
| Q23551     | Twitchin                                                         | Biological 1 and 2          | 5                           |
| P28192     | Tyrosine-protein phosphatase 4                                   | Biological Replicate 2 Only | 1                           |
| Q9BMN8     | Tyrosine-protein phosphatase Lar-like                            | Biological Replicate 2 Only | 2                           |
| O01884     | Ubiquinone biosynthesis monooxygenase COQ6, mitochondrial        | Biological Replicate 1 Only | 1                           |
| Q17361     | Ubiquitin carboxyl-terminal hydrolase 14                         | Biological Replicate 2 Only | 1                           |
| Q7JKC3     | Ubiquitin carboxyl-terminal hydrolase 7                          | Biological Replicate 1 Only | 1                           |
| G5EES6     | Ubiquitin fusion degradation protein 3 homolog                   | Biological Replicate 2 Only | 1                           |
| Q95XX0     | Ubiquitin-conjugating enzyme E2 13                               | Biological Replicate 2 Only | 1                           |
| O45495     | Ubiquitin-conjugating enzyme E2 variant 1                        | Biological Replicate 2 Only | 1                           |
| P91430     | Ubiquitin-like modifier-activating enzyme 5                      | Biological Replicate 1 Only | 1                           |
| P37165     | Ubiquitin-like protein 1-40S ribosomal protein S27a              | Biological 1 and 2          | 2                           |
| Q564Q1     | UDP-glucose 4-epimerase                                          | Biological Replicate 2 Only | 1                           |
| Q19905     | UDP-glucose 6-dehydrogenase                                      | Biological Replicate 2 Only | 1                           |
| O18158     | UDP-N-acetylglucosamine--peptide N-acetylglucosaminyltransferase | Biological 1 and 2          | 2                           |
| Q18779     | UDP-sugar transporter sqv-7                                      | Biological Replicate 1 Only | 1                           |
| O17622     | UMP-CMP kinase 1                                                 | Biological Replicate 2 Only | 1                           |
| P34261     | Uncharacterized amino-acid permease B0303.11                     | Biological Replicate 2 Only | 1                           |
| Q11083     | Uncharacterized calcium-binding protein B0563.7                  | Biological 1 and 2          | 2                           |
| Q09475     | Uncharacterized helicase C28H8.3                                 | Biological 1 and 2          | 4                           |
| Q09461     | Uncharacterized mitochondrial carrier C16C10.1                   | Biological Replicate 2 Only | 1                           |
| Q11177     | Uncharacterized oxidoreductase dhs-27                            | Biological Replicate 2 Only | 1                           |

| Uniprot ID | Protein Name                     | Biological Replicate        | Number of Modified Peptides |
|------------|----------------------------------|-----------------------------|-----------------------------|
| Q10912     | Uncharacterized protein B0034.4  | Biological Replicate 2 Only | 1                           |
| P34255     | Uncharacterized protein B0303.3  | Biological Replicate 2 Only | 1                           |
| Q09214     | Uncharacterized protein B0495.5  | Biological Replicate 1 Only | 1                           |
| Q11109     | Uncharacterized protein C03B1.2  | Biological Replicate 1 Only | 1                           |
| Q11111     | Uncharacterized protein C03B1.4  | Biological Replicate 1 Only | 1                           |
| Q11124     | Uncharacterized protein C03F11.3 | Biological Replicate 2 Only | 1                           |
| Q11181     | Uncharacterized protein C05D10.4 | Biological 1 and 2          | 2                           |
| P48053     | Uncharacterized protein C05D11.1 | Biological 1 and 2          | 2                           |
| Q18232     | Uncharacterized protein C26F1.3  | Biological Replicate 1 Only | 1                           |
| Q10030     | Uncharacterized protein C27D6.1  | Biological Replicate 2 Only | 1                           |
| Q09259     | Uncharacterized protein C30G12.6 | Biological 1 and 2          | 2                           |
| Q18594     | Uncharacterized protein C44B7.5  | Biological Replicate 2 Only | 1                           |
| Q09280     | Uncharacterized protein C45G9.8  | Biological Replicate 2 Only | 1                           |
| P34367     | Uncharacterized protein C50C3.2  | Biological Replicate 2 Only | 1                           |
| Q09936     | Uncharacterized protein C53C9.2  | Biological 1 and 2          | 2                           |
| Q09287     | Uncharacterized protein C56G2.3  | Biological Replicate 2 Only | 1                           |
| P41954     | Uncharacterized protein D1044.6  | Biological 1 and 2          | 3                           |
| Q09531     | Uncharacterized protein F07F6.4  | Biological Replicate 2 Only | 1                           |
| P53015     | Uncharacterized protein F31E3.4  | Biological Replicate 2 Only | 1                           |
| Q09560     | Uncharacterized protein F36G3.1  | Biological Replicate 2 Only | 1                           |
| P34430     | Uncharacterized protein F44B9.9  | Biological Replicate 2 Only | 1                           |
| P34433     | Uncharacterized protein F44E2.3  | Biological Replicate 1 Only | 1                           |
| Q09389     | Uncharacterized protein F47D12.3 | Biological Replicate 2 Only | 1                           |
| P34445     | Uncharacterized protein F54C8.7  | Biological Replicate 2 Only | 1                           |
| P34504     | Uncharacterized protein K04H4.2  | Biological Replicate 1 Only | 1                           |
| P45967     | Uncharacterized protein mdmh-35  | Biological Replicate 2 Only | 1                           |
| P34542     | Uncharacterized protein R05D3.9  | Biological Replicate 2 Only | 1                           |
| Q09609     | Uncharacterized protein R07B1.9  | Biological 1 and 2          | 2                           |
| Q09350     | Uncharacterized protein T09B9.4  | Biological Replicate 2 Only | 1                           |
| Q09354     | Uncharacterized protein T15H9.4  | Biological Replicate 2 Only | 1                           |
| Q09355     | Uncharacterized protein T15H9.5  | Biological Replicate 2 Only | 1                           |

| Uniprot ID | Protein Name                                             | Biological Replicate        | Number of Modified Peptides |
|------------|----------------------------------------------------------|-----------------------------|-----------------------------|
| Q10012     | Uncharacterized protein T19C3.6                          | Biological Replicate 2 Only | 1                           |
| P46064     | Uncharacterized protein tag-51                           | Biological 1 and 2          | 2                           |
| O02485     | Uncharacterized protein ZK1073.1                         | Biological Replicate 2 Only | 1                           |
| P34603     | Uncharacterized protein ZK1098.3                         | Biological Replicate 1 Only | 1                           |
| Q09359     | Uncharacterized protein ZK1307.1                         | Biological 1 and 2          | 2                           |
| Q02333     | Uncharacterized protein ZK370.6                          | Biological 1 and 2          | 3                           |
| Q09663     | Uncharacterized protein ZK673.4                          | Biological Replicate 1 Only | 1                           |
| P34675     | Uncharacterized protein ZK688.5                          | Biological 1 and 2          | 2                           |
| P91443     | Unconventional myosin heavy chain 6                      | Biological Replicate 2 Only | 1                           |
| O17606     | UPF0160 protein C27H6.8                                  | Biological Replicate 2 Only | 1                           |
| Q09600     | Vacuolar protein sorting-associated protein 11 homolog   | Biological 1 and 2          | 2                           |
| Q11182     | Vacuolar protein sorting-associated protein 16 homolog   | Biological Replicate 1 Only | 1                           |
| Q23194     | Vacuolar protein sorting-associated protein 18 homolog   | Biological 1 and 2          | 2                           |
| Q19954     | Vacuolar protein sorting-associated protein 41 homolog   | Biological Replicate 1 Only | 1                           |
| G5EFV8     | Vacuolar protein sorting-associated protein 52 homolog   | Biological Replicate 1 Only | 1                           |
| Q9U1Q4     | Valine--tRNA ligase                                      | Biological Replicate 2 Only | 2                           |
| O17040     | Very-long-chain (3R)-3-hydroxyacyl-CoA dehydratase hpo-8 | Biological Replicate 2 Only | 1                           |
| Q09517     | Very-long-chain 3-oxoacyl-coA reductase let-767          | Biological 1 and 2          | 3                           |
| Q94392     | Vesicle-fusing ATPase                                    | Biological Replicate 1 Only | 1                           |
| P19826     | Vinculin                                                 | Biological Replicate 2 Only | 2                           |
| P18948     | Vitellogenin-6                                           | Biological Replicate 2 Only | 1                           |
| Q21898     | V-type proton ATPase 16 kDa proteolipid subunit 1        | Biological Replicate 2 Only | 1                           |
| Q9XW92     | V-type proton ATPase catalytic subunit A                 | Biological 1 and 2          | 16                          |
| Q9XXU9     | V-type proton ATPase subunit C                           | Biological 1 and 2          | 3                           |
| Q23229     | XO lethal protein 1                                      | Biological 1 and 2          | 2                           |
| Q95XU6     | Zinc finger CCCH domain-containing protein 14            | Biological Replicate 2 Only | 1                           |
| P34706     | Zinc finger protein sdc-3                                | Biological Replicate 2 Only | 2                           |
| Q21432     | Zinc metalloproteinase nas-11                            | Biological Replicate 1 Only | 1                           |
| Q21180     | Zinc metalloproteinase nas-16                            | Biological 1 and 2          | 2                           |
| Q21181     | Zinc metalloproteinase nas-19                            | Biological Replicate 2 Only | 1                           |
| Q9U3S9     | Zinc metalloproteinase nas-6                             | Biological Replicate 2 Only | 1                           |

| <b>Protein</b> | <b>100 mM H<sub>2</sub>O<sub>2</sub><br/>FLOW</b> | <b>100 mM H<sub>2</sub>O<sub>2</sub><br/>PIXY</b> | <b>200 mM H<sub>2</sub>O<sub>2</sub><br/>PIXY</b> |
|----------------|---------------------------------------------------|---------------------------------------------------|---------------------------------------------------|
| A6NNZ2         | 2                                                 | 2                                                 | 11                                                |
| O60361         | 1                                                 | 1                                                 | 1                                                 |
| P04350         | 6                                                 | 5                                                 | 66.5                                              |
| P04908         | 5.5                                               | 3                                                 | 13                                                |
| P07437         | 9.5                                               | 27.5                                              | 161.5                                             |
| P08238         | 13.5                                              | 2                                                 | 5                                                 |
| POC0S8         | 5.5                                               | 0.5                                               | 13.5                                              |
| P0DMV9         | 0.5                                               | 4                                                 | 4                                                 |
| P17066         | 0.5                                               | 4                                                 | 4                                                 |
| P20671         | 5.5                                               | 0.5                                               | 13                                                |
| P22392         | 1                                                 | 1                                                 | 7                                                 |
| P34931         | 21.5                                              | 21.5                                              | 5.5                                               |
| P60709         | 36.5                                              | 39                                                | 28                                                |
| P62736         | 34.5                                              | 36.5                                              | 72.5                                              |
| P63261         | 52                                                | 50.5                                              | 370.5                                             |
| P68032         | 43                                                | 39                                                | 72.5                                              |
| P68133         | 41.5                                              | 39                                                | 72.5                                              |
| P68371         | 11.5                                              | 29                                                | 160                                               |
| Q13509         | 5                                                 | 13.5                                              | 56                                                |
| Q3ZCM7         | 5                                                 | 5.5                                               | 14                                                |
| Q562R1         | 1.5                                               | 4.5                                               | 10                                                |
| Q6FI13         | 9                                                 | 4.5                                               | 28                                                |
| Q6S8J3         | 4.5                                               | 5                                                 | 75.5                                              |
| Q7L7L0         | 3.5                                               | 1                                                 | 4                                                 |
| Q93077         | 5.5                                               | 1                                                 | 13.5                                              |
| Q96KK5         | 5.5                                               | 1                                                 | 13.5                                              |
| Q99878         | 5.5                                               | 1                                                 | 13.5                                              |
| Q9BTM1         | 5.5                                               | 1                                                 | 13.5                                              |



|        |      |      |       |
|--------|------|------|-------|
| Q9BUF5 | 8    | 7.5  | 20.5  |
| Q9BVA1 | 10   | 28.5 | 164.5 |
| Q9BYX7 | 0.5  | 2.5  | 1     |
| Q9H4B7 | 1    | 1    | 2     |
| A5A3E0 | 0.5  | 3    | 1     |
| O75475 | 0.5  | 1.5  | 63    |
| P04350 | 17   | 20.5 | 121   |
| P04406 | 2.5  | 2    | 72.5  |
| P07197 | 21.5 | 5.5  | 33    |
| P07237 | 5.5  | 8    | 11    |
| P07900 | 2    | 1.5  | 49    |
| P07910 | 1.5  | 2.5  | 8.5   |
| P08238 | 15.5 | 4.5  | 35    |
| P08670 | 5    | 9    | 34    |
| P0DMV9 | 63.5 | 29   | 127.5 |
| P10809 | 30   | 67   | 61.5  |
| P11021 | 23.5 | 24.5 | 8     |
| P11142 | 16   | 16   | 39.5  |
| P12277 | 5    | 2    | 124.5 |
| P13667 | 4    | 13   | 8.5   |
| P13797 | 3    | 5    | 12    |
| P14314 | 3.5  | 8    | 2.5   |
| P14625 | 2    | 4    | 20.5  |
| P15531 | 3.5  | 2    | 14.5  |
| P18206 | 1    | 10   | 37    |
| P19338 | 4.5  | 14   | 7.5   |
| P20674 | 3.5  | 2.5  | 2     |
| P22314 | 9.5  | 2    | 11.5  |
| P22626 | 49.5 | 10   | 58.5  |
| P23246 | 1    | 11   | 64    |

|        |      |      |       |
|--------|------|------|-------|
| P27348 | 15.5 | 5    | 14    |
| P27797 | 36   | 24   | 60.5  |
| P30101 | 6.5  | 7.5  | 17.5  |
| P30153 | 0.5  | 2.5  | 5     |
| P31946 | 14.5 | 5    | 3     |
| P31948 | 6    | 33.5 | 45.5  |
| P34932 | 6    | 4.5  | 14    |
| P35579 | 16   | 11.5 | 83    |
| P35613 | 1.5  | 1.5  | 4.5   |
| P37802 | 12   | 10.5 | 2.5   |
| P38646 | 24   | 11.5 | 15.5  |
| P40926 | 1.5  | 0.5  | 2.5   |
| P48741 | 0.5  | 4    | 4     |
| P49321 | 3    | 9.5  | 8     |
| P50991 | 1    | 1    | 16.5  |
| P60660 | 7    | 9.5  | 2.5   |
| P60709 | 49.5 | 41   | 28    |
| P60842 | 2.5  | 4    | 34.5  |
| P61978 | 15.5 | 20.5 | 15.5  |
| P62805 | 4    | 0.5  | 5.5   |
| P63267 | 34.5 | 36.5 | 72.5  |
| P67809 | 39.5 | 39.5 | 5.5   |
| P68104 | 4    | 2    | 230.5 |
| Q00839 | 4.5  | 6    | 20    |
| Q04760 | 12   | 0.5  | 8     |
| Q06830 | 1    | 1    | 10    |
| Q07021 | 2    | 4    | 73.5  |
| Q13263 | 15   | 6    | 27    |
| Q13509 | 14   | 16   | 60    |
| Q13885 | 10   | 28.5 | 164.5 |

|                 |             |             |             |
|-----------------|-------------|-------------|-------------|
| Q15233          | 4           | 15.5        | 89.5        |
| Q15365          | 4.5         | 9           | 16          |
| Q15459          | 2           | 2.5         | 4           |
| Q15819          | 3           | 7.5         | 16.5        |
| Q16777          | 9           | 4.5         | 28          |
| Q5VTE0          | 4           | 2           | 227.5       |
| Q8NC51          | 7           | 12          | 2.5         |
| Q9NS69          | 2.5         | 3           | 3           |
|                 |             |             |             |
| <b>Average</b>  | 10.94791667 | 11.08333333 | 41.44270833 |
| <b>ST.DEV</b>   | 13.56048423 | 13.26682976 | 59.30389487 |
| <b>ST.DEV.P</b> | 13.48967181 | 13.1975508  | 58.99421184 |
| <b>ST.DEV.S</b> | 13.56048423 | 13.26682976 | 59.30389487 |

**Table S7.** Average number of modifications per system (Full list of raw data). The number of residues modified per protein have a large range which results in a standard deviation value greater than the average. Some values are averages of modifications found on each protein between the 2 biological replicates.
